# Supplementary material for: Theoretical study on the mechanism of the gas phase reaction of methoxybenzene with ozone
Source: Royal Society of Chemistry journal article supplement (doi:10.1039/c6ra22286b), 2016-01-01
Supplement: c6ra22286b1.pdf [file c6ra22286b1.pdf]

## Supplementary Information

Theoretical study on the mechanism of the gas phase  
reaction of methoxybenzene with ozone

Jianfei Sun, Haijie Cao, Shiqing Zhang, Xin Li, Maoxia He\*

Environment Research Institute, Shandong University,

Jinan 250100, P. R. China

### *Detailed parameters in the kinetic calculations*

The rate constants of unimolecular reactions in this paper are obtained by solving the energy-grained master-equation with the MultiWell program.

The energy-dependent specific unimolecular rate constant is given as follows:

$$k(E) = \left[ \frac{m^\ddagger \sigma_{ext}}{m \sigma_{ext}^\ddagger} \right] \frac{g^\ddagger \rho(E - E_0)}{g h \rho(E)}$$

where  $m^\ddagger$  and  $m$  are the number of optical isomers,  $\sigma_{ext}^\ddagger$  and  $\sigma_{ext}$  are the external rotation symmetry numbers,  $g^\ddagger$  and  $g$  represent the electronic state degeneracies of the transition state and corresponding reactant, respectively.  $h$  is the Plank's constant.  $\rho(E)$  is the density of states of the reactant and  $\rho(E - E_0)$  is the sum of states of the transition state. In this work, the transition states of the entrance channels are treated as tight transition states rather than variational transition states.

The collision rate constants were calculated by Klaus Luther's empirical function with kinetically controlled selective ionization parameters[2]. As the Lennard-Jones parameters for IM1 are not available from the literature, we try to estimate these parameters theoretically. The intermolecular interaction energy between the primary ozonide and argon bath gas has been estimated at the M06-2X/6-31+g(d,p) level as shown in Fig. S3 in Supplementary Information. So the Lennard-Jones parameter of IM1 was set as  $\sigma_{IM1} = 5.14 \text{ \AA}$  and  $\varepsilon_{IM1}/k_b = 5840.80 \text{ K}$  to confirm that the Lennard-Jones parameters for IM1 + Ar collisions are in confidence with Fig. S3. The Lennard-Jones parameters for other intermediates are also set as  $\sigma = 5.14 \text{ \AA}$  and  $\varepsilon/k_b = 5840.80 \text{ K}$  in the input files, for convenience.

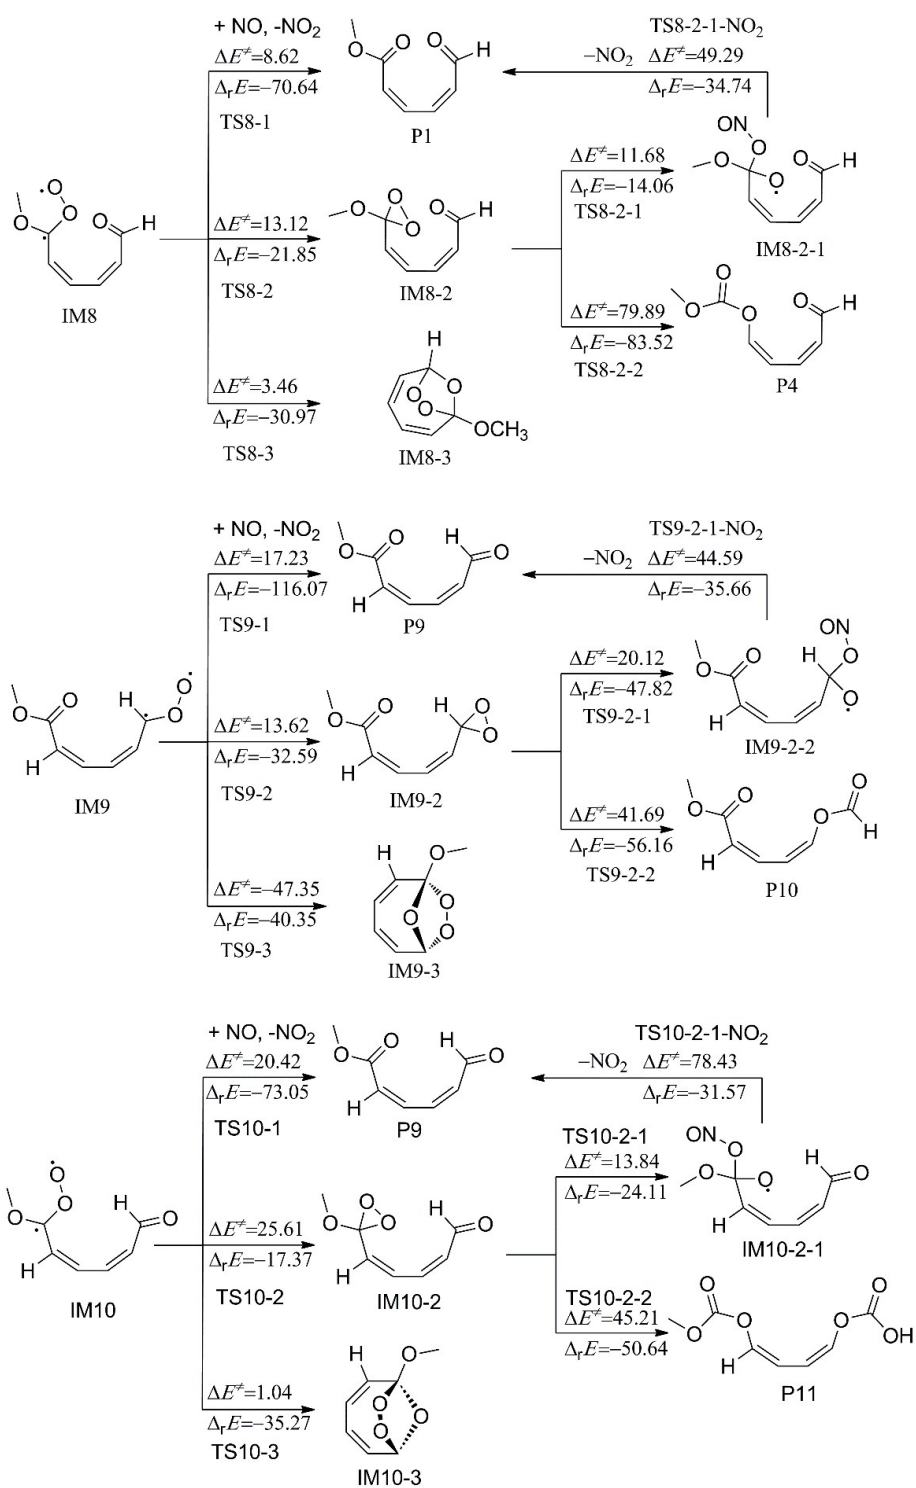

**Fig. S1.** The detailed mechanisms of the further reaction for the Criegee intermediates IM7, IM8, IM9, IM10, IM11, IM12, IM13, IM14, IM15, IM16, IM17 and IM18 respectively.

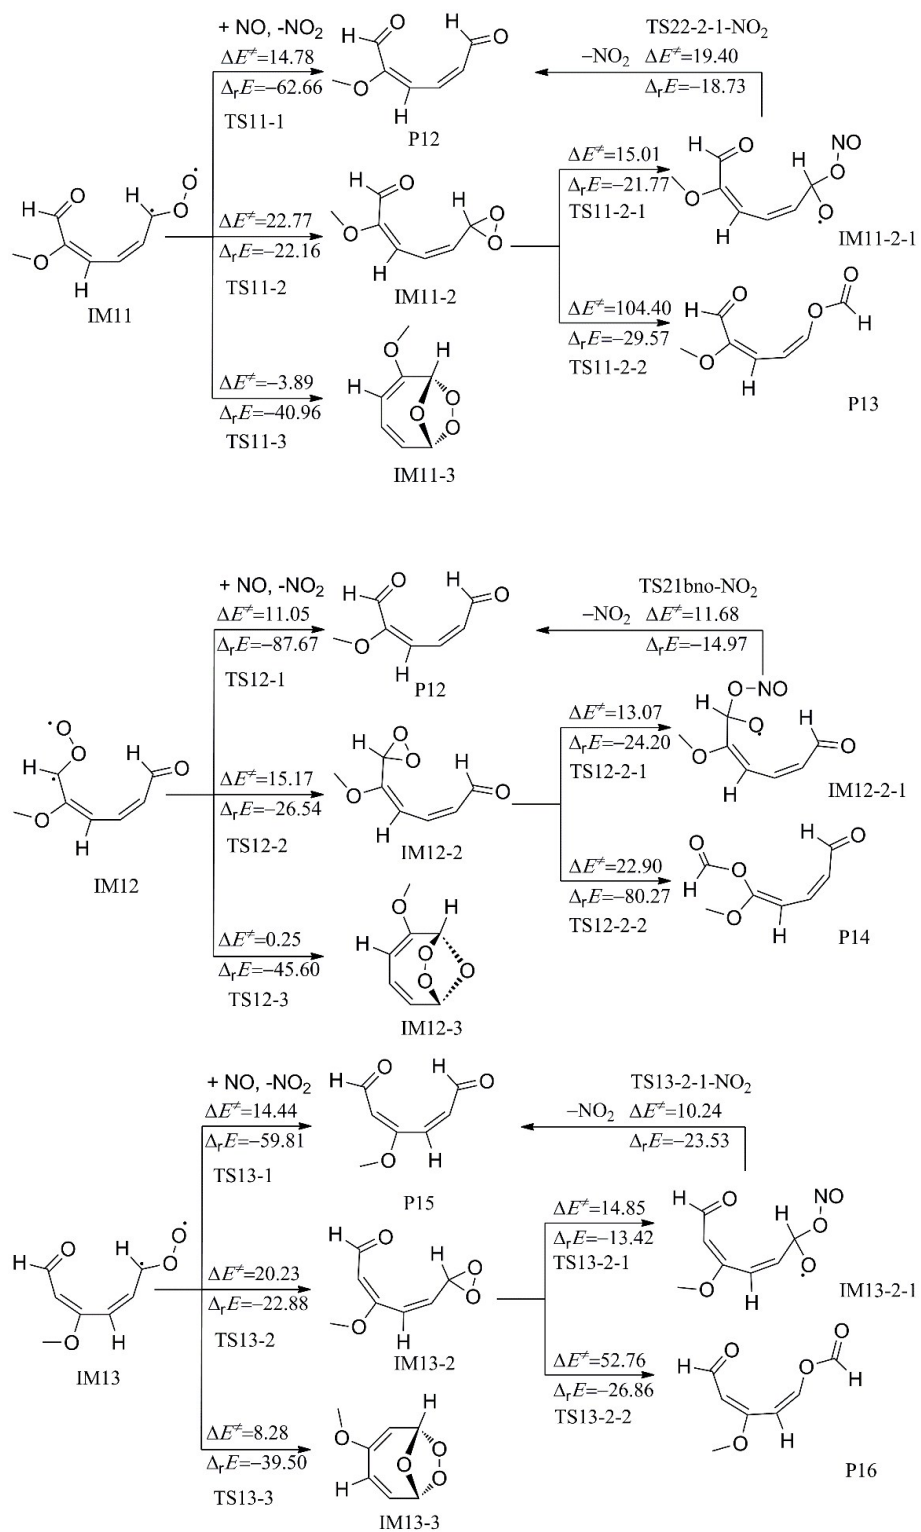

Fig. S1. Continued.

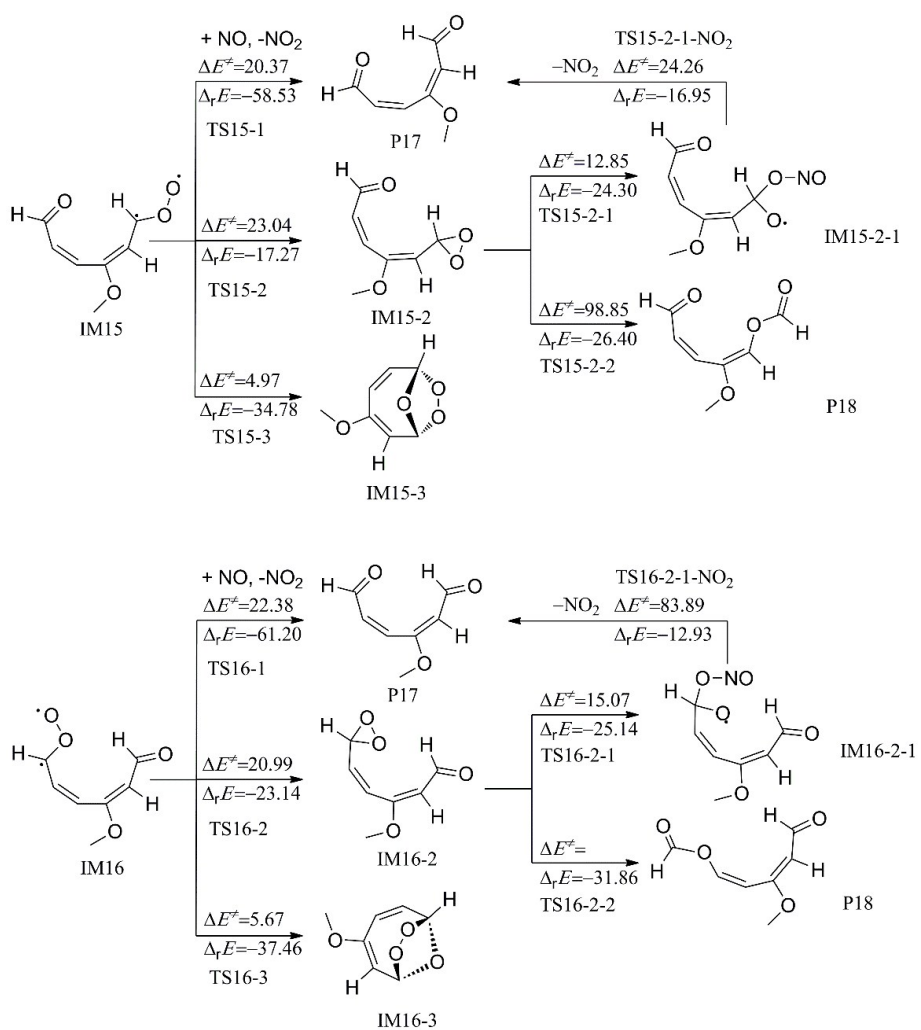

Fig. S1. Continued.

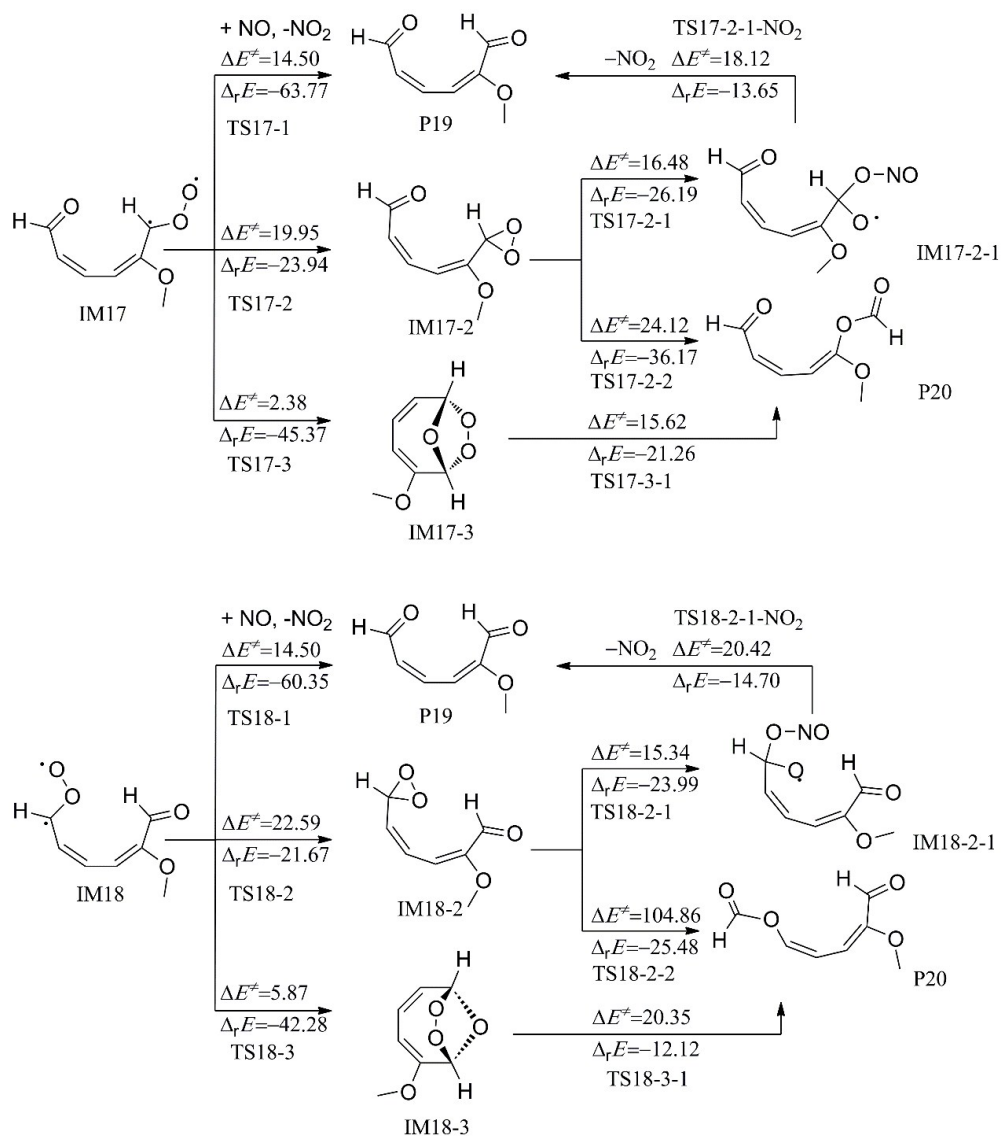

Fig. S1. Continued.

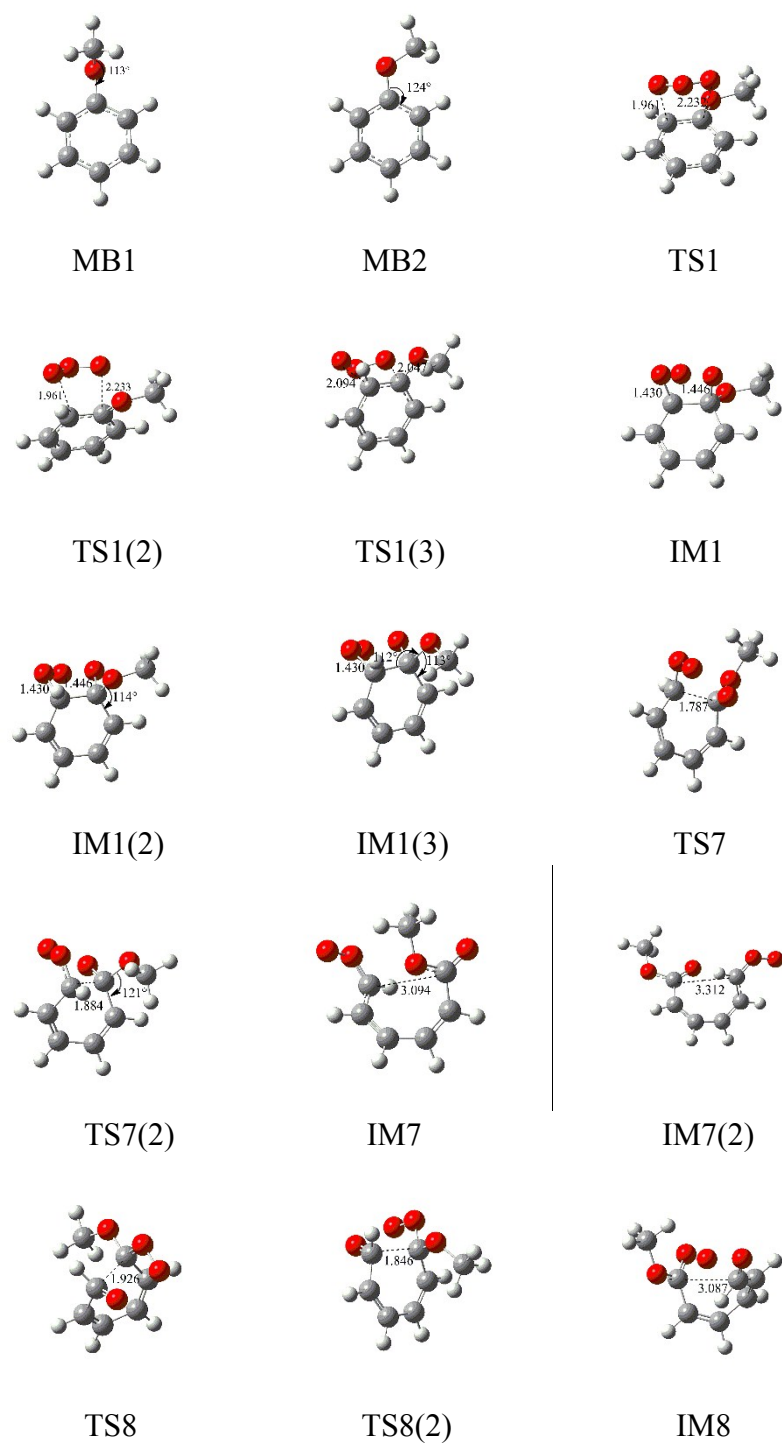

**Fig. S2.** M06-2X/6-31+g(d,p) optimized geometries for the reactants, transition states, intermediates involved in the initial reaction of MB + O<sub>3</sub> (bond length in Å and angle in degree).

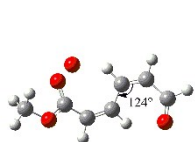

IM8(2)

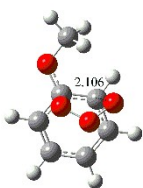

TS2

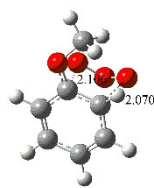

TS2(2)

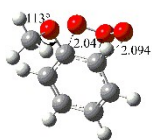

TS3(2)

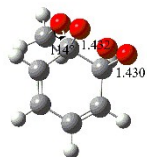

IM2

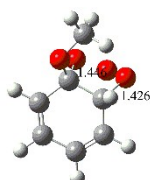

IM2(2)

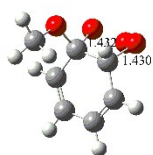

IM2(3)

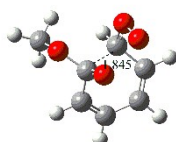

TS9

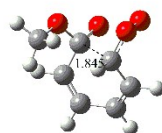

TS9(2)

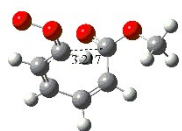

IM9

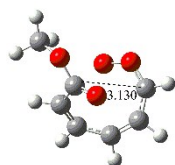

IM9(2)

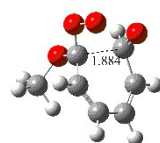

TS10

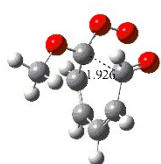

TS10(2)

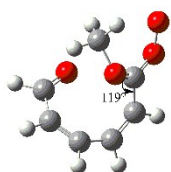

IM10

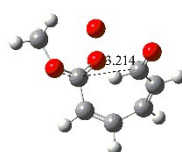

IM10(2)

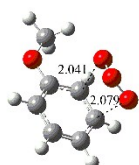

TS3

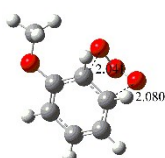

TS3(2)

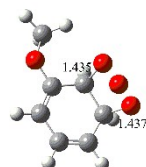

IM3

Fig. S2. Continued.



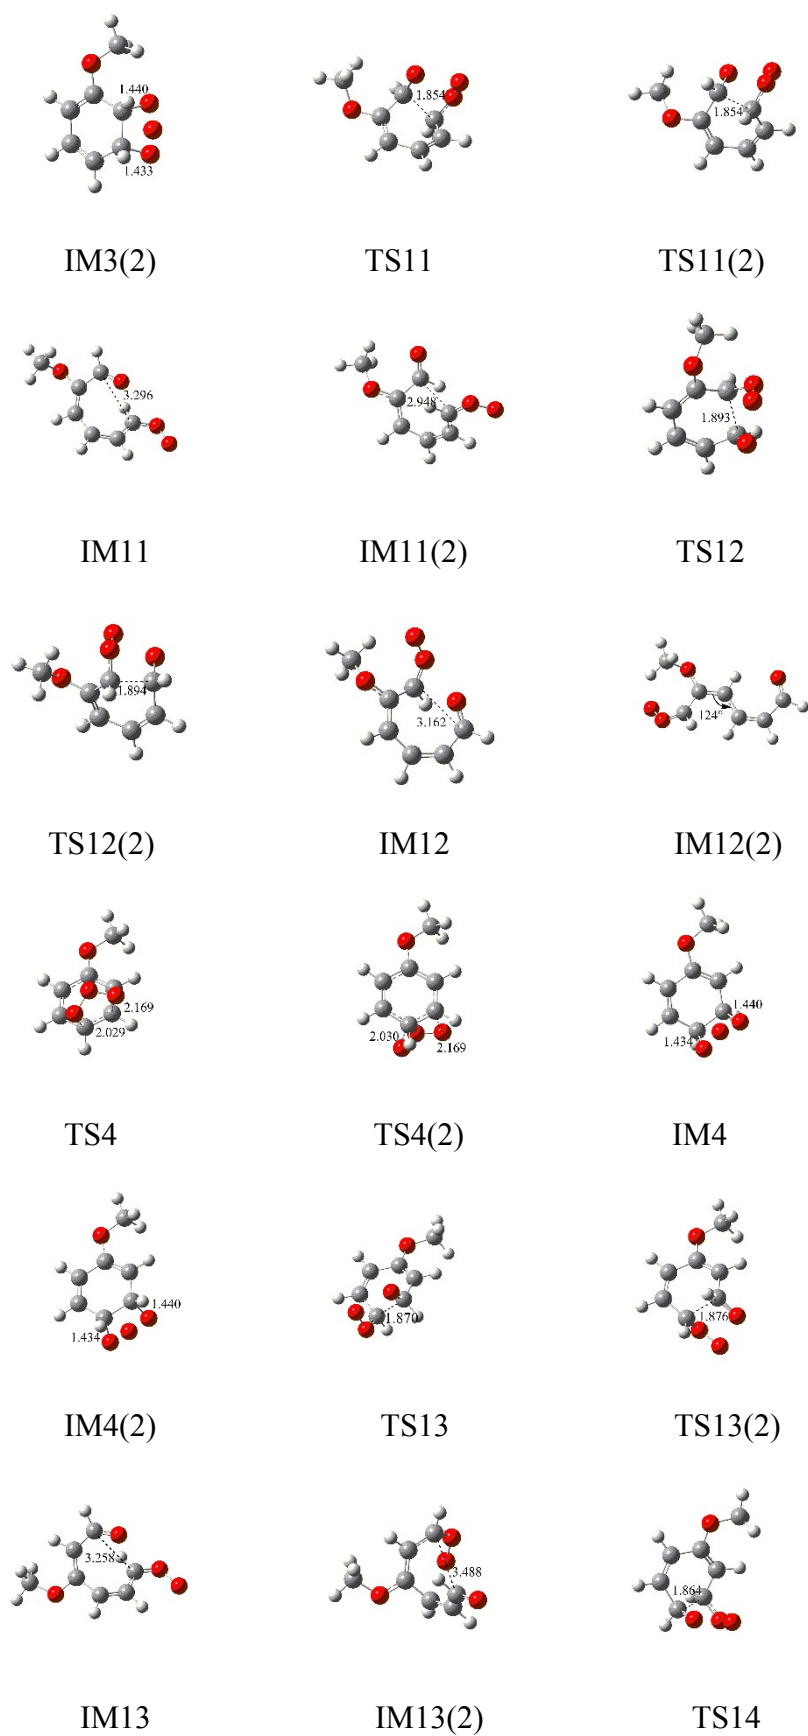

Fig. S2. Continued.

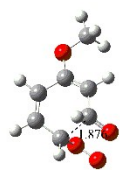

TS14(2)

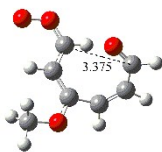

IM14

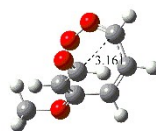

IM14(2)

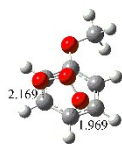

TS5

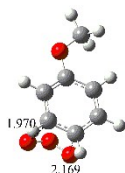

TS5(2)

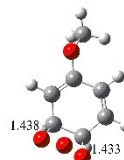

IM5

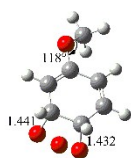

IM5(2)

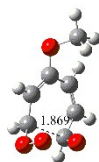

TS15

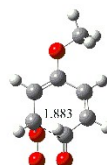

TS15(2)

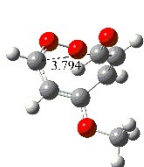

IM15

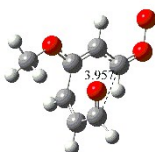

IM1(2)

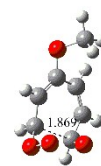

TS16

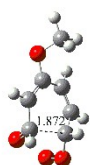

TS16(2)

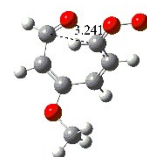

IM16

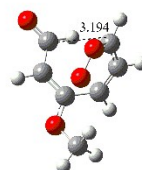

IM16(2)

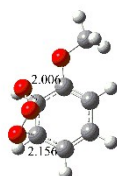

TS6

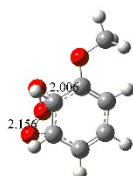

TS6(2)

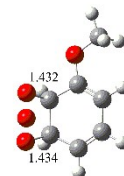

IM6

Fig. S2. Continued.

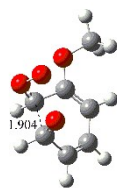

IM6(2)

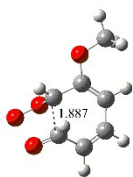

TS17

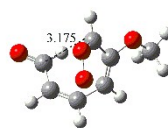

TS17(2)

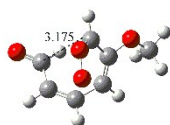

IM17

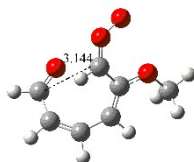

IM17(2)

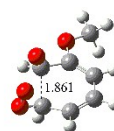

TS18

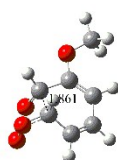

TS18(2)

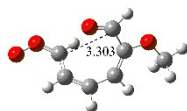

IM18

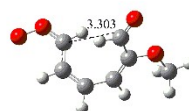

IM18(2)

**Fig. S2.** Continued.

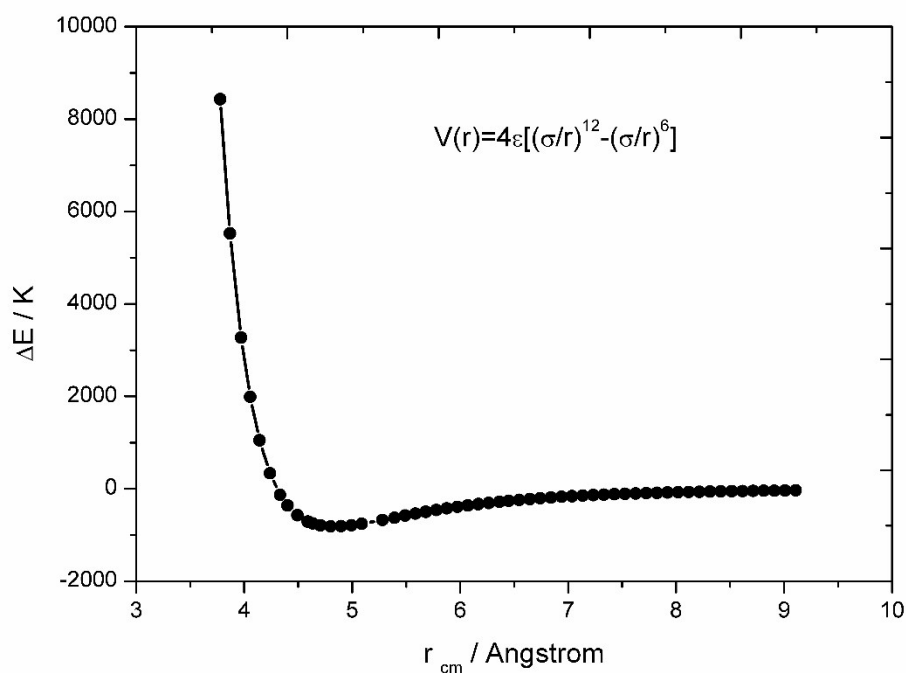

**Fig. S3.** The intermolecular interaction energy between the primary ozonide and argon bath gas has been estimated at the M06-2X/6-31+g(d,p).

**Table S1.** The energy barriers ( $\Delta E^\ddagger$ , kcal mol<sup>-1</sup>) and reaction heats ( $\Delta_r E$ , kcal mol<sup>-1</sup>) of MB + O<sub>3</sub> → IM1 at different levels.

| Functionals                                  | with dispersion corrections |              | without dispersion corrections |              |
|----------------------------------------------|-----------------------------|--------------|--------------------------------|--------------|
|                                              | $\Delta E^\ddagger$         | $\Delta_r E$ | $\Delta E^\ddagger$            | $\Delta_r E$ |
| B2PLYP/aug-cc-pVDZ//B2PLYP/aug-cc-pVDZ       | 9.80                        | -32.65       | 7.23                           | -34.80       |
| wB97X/aug-cc-pVDZ//wB97X/aug-cc-pVDZ         | 7.52                        | -28.13       | 8.74                           | -30.16       |
| CCSD(T)/6-31+g(d,p)//M06-2X/6-31+g(d,p)      | -                           | -            | 7.18                           | 32.04        |
| M06-2X/TZVP//M06-2X/TZVP                     | -                           | -            | 10.13                          | -41.23       |
| M06-2X/aug-cc-pVDZ//M06-2X/6-31+g(d,p)       | -                           | -            | 7.28                           | -31.50       |
| M06-2X/aug-cc-pVQZ//M06-2X/6-31+g(d,p)       | -                           | -            | 8.12                           | -33.94       |
| M06-2X/aug-cc-pVTZ//M06-2X/6-31+g(d,p)       | -                           | -            | 8.43                           | -38.97       |
| M06-2X/6-311++g(3df, 2p)//M06-2X/6-31+g(d,p) | -                           | -            | 5.80                           | -36.74       |

**Table S2.** The overall and individual rate constants ( $k_i/\text{cm}^{-3} \text{ molecule}^{-1} \text{ s}^{-1}$ ) at 1 atm and over the temperature range of 200-400 K.

| T/K | $k_1$     | $k_2$     | $k_3$     | $k_4$    | $k_5$     | $k_6$    | $k_{\text{tot}}$ |
|-----|-----------|-----------|-----------|----------|-----------|----------|------------------|
| 200 | 1.89E-24  | 2.79E-24  | 6.80E-28  | 3.79E-25 | 4.73 E-27 | 3.46E-26 | 5.10E-24         |
| 225 | 1.51E-23  | 2.07E-23  | 1.37 E-26 | 3.84E-24 | 7.94 E-26 | 4.71E-25 | 4.01E-23         |
| 250 | 8.11E-23  | 1.05E-22  | 1.55E-25  | 2.51E-23 | 7.77 E-25 | 3.86E-24 | 2.16E-22         |
| 275 | 3.20E-22  | 4.06E-22  | 1.15E-24  | 1.19E-22 | 5.14E-24  | 2.20E-23 | 8.82E-22         |
| 298 | 9.85E-22  | 1.17 E-21 | 5.48E-24  | 4.01E-22 | 2.24 E-23 | 8.63E-23 | 2.67E-21         |
| 325 | 2.98 E-21 | 3.41 E-21 | 2.63E-23  | 1.36E-21 | 9.83E-23  | 3.37E-22 | 8.22E-21         |
| 350 | 7.24E-21  | 8.06 E-21 | 9.19 E-23 | 3.63E-21 | 3.19 E-22 | 1.00E-21 | 2.03E-20         |
| 375 | 1.59E-20  | 1.72E-20  | 2.74E-22  | 8.60E-21 | 8.96E-22  | 2.63E-21 | 4.54E-20         |
| 400 | 3.19E-20  | 3.37E-20  | 7.25E-22  | 1.85E-20 | 2.25E-21  | 6.15E-21 | 9.32E-20         |

**Table S3.** The calculated TST rate constants ( $\text{cm}^{-3} \text{ molecule}^{-1} \text{ s}^{-1}$ ) for the entrance channels over the temperature range of 200-400 K.

| T/K | $k_1$    | $k_2$    | $k_3$    | $k_4$    | $k_5$    | $k_6$    | $k_{\text{tot}}$ |
|-----|----------|----------|----------|----------|----------|----------|------------------|
| 200 | 2.73E-24 | 4.08E-24 | 1.07E-27 | 1.38E-24 | 7.20E-27 | 5.11E-26 | 8.24E-24         |
| 225 | 1.99E-23 | 2.76E-23 | 1.93E-26 | 1.16E-23 | 1.10E-25 | 6.30E-25 | 5.99E-23         |
| 250 | 1.01E-22 | 1.32E-22 | 2.03E-25 | 6.58E-23 | 1.00E-24 | 4.87E-24 | 3.05E-22         |
| 275 | 3.93E-22 | 4.86E-22 | 1.43E-24 | 2.79E-22 | 6.29E-24 | 2.66E-23 | 1.19E-21         |
| 298 | 1.25E-21 | 1.48E-21 | 7.41E-24 | 9.52E-22 | 2.97E-23 | 1.12E-22 | 3.82E-21         |
| 325 | 3.37E-21 | 3.85E-21 | 3.04E-23 | 2.74E-21 | 1.13E-22 | 3.84E-22 | 1.05E-20         |
| 350 | 8.05E-21 | 8.91E-21 | 1.04E-22 | 6.87E-21 | 3.59E-22 | 1.12E-21 | 2.54E-20         |
| 375 | 1.74E-20 | 1.87E-20 | 3.05E-22 | 1.55E-20 | 9.93E-22 | 2.89E-21 | 5.57E-20         |
| 400 | 3.44E-20 | 3.63E-20 | 7.93E-22 | 3.19E-20 | 2.45E-21 | 6.67E-21 | 1.12E-19         |

**Table S4.** Relative energies (kcal/mol) with respect to the total energies of MB1 and O<sub>3</sub> for the intermediates, transition states involved in the initial reaction of MB + O<sub>3</sub>. ( $\Delta E$  values are from M06-2X/aug-cc-pVDZ//M06-2X/6-31+g(d,p) level of theory.)

| Compound | $\Delta E$ | Compound | $\Delta E$ |
|----------|------------|----------|------------|
| MB1+O3   | 0          | TS12(2)  | -1.08      |
| TS1      | 7.28       | IM12(2)  | -35.19     |
| IM1      | -34.60     | TS4      | 7.76       |
| TS1(2)   | 7.28       | IM4      | -36.51     |
| IM1(2)   | -34.60     | TS4(2)   | 7.75       |
| TS1(3)   | 12.93      | IM4(2)   | -36.51     |
| IM1(3)   | -33.37     | TS13     | -7.49      |
| TS7      | -14.67     | IM13     | -42.49     |
| IM7      | -59.80     | TS13(2)  | -8.41      |
| TS7(2)   | -12.16     | IM13(2)  | -43.47     |
| IM7(2)   | -59.47     | TS14     | -8.41      |
| TS8      | -7.47      | IM14     | -43.80     |
| IM8      | -49.10     | TS14(2)  | -10.70     |
| TS8(2)   | -7.47      | IM14(2)  | -42.35     |
| IM8(2)   | -50.30     | TS5      | 9.92       |
| TS2      | 7.04       | IM5      | -31.32     |
| IM2      | -33.37     | TS5(2)   | 9.92       |
| TS2(2)   | 7.04       | IM5(2)   | -31.69     |
| IM2(2)   | -36.19     | TS15     | -4.07      |
| TS2(3)   | 10.93      | IM15     | -42.55     |
| IM2(3)   | -33.37     | TS15(2)  | -8.83      |
| TS9      | -9.65      | IM15(5)  | -40.66     |
| IM9      | -50.35     | TS16     | -3.18      |
| TS9(2)   | -9.65      | IM16     | -39.88     |
| IM9(2)   | -54.42     | TS16(2)  | -3.18      |
| TS10     | -7.47      | IM16(2)  | -40.02     |
| IM10     | -46.68     | TS6      | 9.13       |
| TS10(2)  | -7.47      | IM6      | -35.96     |
| IM10(2)  | -45.35     | TS6(2)   | 9.41       |
| TS3      | 10.55      | IM6(2)   | -35.95     |
| IM3      | -32.18     | TS17     | -4.87      |
| TS3(2)   | 10.56      | IM17     | -36.28     |
| IM3(2)   | -35.13     | TS17(2)  | -9.52      |
| TS11     | -6.23      | IM17(2)  | -31.13     |
| IM11     | -35.11     | TS18     | -8.55      |
| TS11(2)  | -6.23      | IM18     | -39.70     |
| IM11(2)  | -39.26     | TS18(2)  | -8.55      |
| TS12     | -1.06      | IM18(2)  | -39.69     |

**Table S5.** Coordinates for various species involved in the MB + O<sub>3</sub> reaction (the M06-2X/6-31+g(d,p) optimized data, in Å)

| MB             |           |           |           |
|----------------|-----------|-----------|-----------|
| C              | -3.157087 | -1.690750 | -0.079768 |
| C              | -1.761927 | -1.690750 | -0.079768 |
| C              | -1.064389 | -0.482999 | -0.079768 |
| C              | -1.762043 | 0.725510  | -0.080967 |
| C              | -3.156868 | 0.725432  | -0.081446 |
| C              | -3.854469 | -0.482774 | -0.080450 |
| H              | -3.706846 | -2.643067 | -0.079318 |
| H              | -1.212419 | -2.643263 | -0.078453 |
| H              | 0.035291  | -0.482919 | -0.079134 |
| H              | -3.706990 | 1.677713  | -0.082399 |
| H              | -4.954073 | -0.482591 | -0.080630 |
| O              | -1.046575 | 1.963656  | -0.081043 |
| C              | 0.359250  | 1.701821  | -0.081027 |
| H              | 0.617454  | 1.140179  | -0.954405 |
| H              | 0.894600  | 2.628266  | -0.081561 |
| H              | 0.617606  | 1.141100  | 0.792897  |
| O <sub>3</sub> |           |           |           |
| O              | -0.284091 | 0.892857  | 0.000000  |
| O              | 1.035909  | 0.892857  | 0.000000  |
| O              | 1.476534  | -0.351430 | 0.000002  |

## TS1

|   |           |           |           |
|---|-----------|-----------|-----------|
| C | 1.112021  | 1.981218  | 0.134117  |
| C | -0.206244 | 1.620316  | 0.009029  |
| C | -0.521918 | 0.304374  | -0.403473 |
| C | 0.553623  | -0.595081 | -0.794248 |
| C | 1.891229  | -0.105763 | -0.825348 |
| C | 2.164150  | 1.123425  | -0.297619 |
| H | 1.358002  | 2.959783  | 0.533035  |
| H | -1.000158 | 2.299672  | 0.294811  |
| H | 2.658576  | -0.770065 | -1.205663 |
| H | 3.189890  | 1.469669  | -0.232696 |
| O | -1.730567 | -0.131237 | -0.797445 |
| C | -2.863506 | 0.564534  | -0.291082 |
| H | -2.937086 | 1.557577  | -0.745819 |
| H | -3.731655 | -0.030033 | -0.569728 |
| H | -2.791823 | 0.645611  | 0.797569  |
| O | 0.768081  | -1.566969 | 0.954751  |
| O | 0.413419  | -0.729378 | 1.868533  |
| O | -0.807942 | -0.346882 | 1.671228  |
| H | 0.342302  | -1.611104 | -1.054902 |

## IM1

|   |           |           |           |
|---|-----------|-----------|-----------|
| C | 1.082784  | 2.080307  | 0.182151  |
| C | -0.178705 | 1.652241  | 0.278868  |
| C | -0.540859 | 0.207205  | 0.078736  |
| C | 0.621350  | -0.719862 | -0.466059 |
| C | 1.984366  | -0.095183 | -0.494769 |
| C | 2.188770  | 1.187546  | -0.192296 |
| H | 1.314055  | 3.121728  | 0.385022  |
| H | -0.977200 | 2.321435  | 0.582694  |
| H | 2.785159  | -0.761881 | -0.798567 |
| H | 3.190511  | 1.603596  | -0.234150 |
| O | -1.624555 | 0.000531  | -0.768470 |
| C | -2.861585 | 0.583870  | -0.372009 |
| H | -2.845949 | 1.668891  | -0.513479 |
| H | -3.618966 | 0.150828  | -1.024560 |
| H | -3.092125 | 0.337476  | 0.668321  |
| O | 0.581641  | -1.795692 | 0.499226  |
| O | 0.298407  | -1.118957 | 1.692320  |
| O | -0.864986 | -0.375531 | 1.351315  |
| H | 0.422339  | -1.144240 | -1.427931 |



## TS2

---

|   |           |           |           |
|---|-----------|-----------|-----------|
| C | -1.248694 | -1.407145 | -1.121864 |
| C | 0.046156  | -0.859194 | -1.071987 |
| C | 0.224054  | 0.398267  | -0.396836 |
| C | -0.937085 | 1.131778  | 0.070685  |
| C | -2.164050 | 0.532903  | 0.060165  |
| C | -2.301705 | -0.754098 | -0.518147 |
| H | -1.399512 | -2.358824 | -1.617368 |
| H | 0.832884  | -1.227233 | -1.718285 |
| H | -3.013073 | 1.055833  | 0.484076  |
| H | -3.285683 | -1.213026 | -0.525794 |
| O | 1.315597  | 1.177601  | -0.543165 |
| C | 2.551452  | 0.528950  | -0.847307 |
| H | 2.581070  | 0.254610  | -1.906575 |
| H | 3.330065  | 1.261458  | -0.640544 |
| H | 2.674584  | -0.353405 | -0.215565 |
| O | 0.641354  | -0.174874 | 1.461595  |
| O | 0.362621  | -1.437799 | 1.445428  |
| O | 1.001453  | -2.012853 | 0.477902  |
| H | -0.785605 | 2.122694  | 0.472604  |

---

## IM2

---

|   |           |           |           |
|---|-----------|-----------|-----------|
| C | 1.338713  | 0.971970  | 1.036284  |
| C | 0.532576  | -0.285523 | 0.933806  |
| C | -0.492440 | -0.347211 | -0.244248 |
| C | -0.549520 | 0.878419  | -1.129285 |
| C | 0.227616  | 1.949486  | -0.934238 |
| C | 1.180892  | 1.985256  | 0.176105  |
| H | 2.060032  | 1.021474  | 1.845341  |
| H | 0.009704  | -0.512630 | 1.869185  |
| H | 0.158648  | 2.787693  | -1.618815 |
| H | 1.783448  | 2.881913  | 0.287456  |
| O | -1.774644 | -0.741590 | 0.142550  |
| C | -2.516395 | 0.270698  | 0.814165  |
| H | -2.749834 | 1.104668  | 0.143303  |
| H | -3.437192 | -0.205280 | 1.148682  |
| H | -1.968016 | 0.651389  | 1.685020  |
| O | -0.033072 | -1.458980 | -1.015468 |
| O | 1.348746  | -1.493838 | -0.728403 |
| O | 1.343065  | -1.441979 | 0.682991  |
| H | -1.258199 | 0.823301  | -1.929058 |

---

## TS3

---

|   |           |           |           |
|---|-----------|-----------|-----------|
| C | 1.411509  | 0.038612  | 1.106627  |
| C | 0.107712  | -0.565160 | 0.976818  |
| C | -0.897618 | 0.146679  | 0.325696  |
| C | -0.630761 | 1.405300  | -0.200792 |
| C | 0.608852  | 2.055729  | 0.034837  |
| C | 1.588231  | 1.415789  | 0.732744  |
| H | 2.081345  | -0.390428 | 1.842825  |
| H | -0.105491 | -1.482689 | 1.508030  |
| H | 0.731831  | 3.062714  | -0.348754 |
| H | 2.540790  | 1.894663  | 0.926926  |
| O | -2.162384 | -0.309579 | 0.081156  |
| C | -2.449106 | -1.662459 | 0.407418  |
| H | -2.443899 | -1.806927 | 1.493666  |
| H | -3.450590 | -1.855406 | 0.024908  |
| H | -1.729751 | -2.334374 | -0.069398 |
| O | 0.679033  | -1.947274 | -0.726579 |
| O | 1.467213  | -1.032336 | -1.207069 |
| O | 2.374205  | -0.723454 | -0.335826 |
| H | -1.312255 | 1.882750  | -0.706459 |

---

## IM3

---

|   |           |           |           |
|---|-----------|-----------|-----------|
| C | 1.596620  | 0.143711  | 0.772624  |
| C | 0.321123  | -0.738529 | 0.561533  |
| C | -0.895983 | 0.005591  | 0.113268  |
| C | -0.902844 | 1.330733  | -0.095139 |
| C | 0.292375  | 2.148585  | 0.096663  |
| C | 1.450122  | 1.610023  | 0.484873  |
| H | 2.012070  | -0.011958 | 1.772561  |
| H | 0.121143  | -1.344115 | 1.450696  |
| H | 0.191820  | 3.209894  | -0.108734 |
| H | 2.344986  | 2.212548  | 0.602258  |
| O | -2.032386 | -0.687215 | -0.224873 |
| C | -2.299833 | -1.885238 | 0.487678  |
| H | -2.371517 | -1.694682 | 1.565586  |
| H | -3.259066 | -2.247447 | 0.119582  |
| H | -1.531532 | -2.640456 | 0.289481  |
| O | 0.752098  | -1.689896 | -0.425149 |
| O | 1.718791  | -0.957290 | -1.153119 |
| O | 2.542030  | -0.477935 | -0.108915 |
| H | -1.769448 | 1.856115  | -0.438464 |

---

## TS4

---

|   |           |           |           |
|---|-----------|-----------|-----------|
| C | 0.93611   | -0.70422  | 1.17528   |
| C | -0.405753 | -1.006667 | 0.810152  |
| C | -1.158047 | -0.046390 | 0.192209  |
| C | -0.665883 | 1.297109  | 0.045037  |
| C | 0.566987  | 1.641508  | 0.528863  |
| C | 1.419349  | 0.639367  | 1.046514  |
| H | 1.473762  | -1.390528 | 1.817551  |
| H | -0.781405 | -2.011031 | 0.959556  |
| H | 0.896917  | 2.670749  | 0.451286  |
| H | 2.317778  | 0.923815  | 1.579456  |
| O | -2.416109 | -0.202635 | -0.297595 |
| C | -2.991421 | -1.496012 | -0.221243 |
| H | -3.104387 | -1.805922 | 0.823386  |
| H | -3.970974 | -1.420096 | -0.690424 |
| H | -2.373465 | -2.222175 | -0.760015 |
| O | 1.888841  | -1.599673 | -0.437283 |
| O | 1.992597  | -0.570724 | -1.201971 |
| O | 2.701493  | 0.341322  | -0.638258 |
| H | -1.298081 | 2.029188  | -0.412440 |

---

## IM4

---

|   |           |           |           |
|---|-----------|-----------|-----------|
| C | 1.094100  | -0.871841 | 0.776479  |
| C | -0.357088 | -1.104550 | 0.483750  |
| C | -1.171966 | -0.103169 | 0.133859  |
| C | -0.707114 | 1.301917  | 0.055597  |
| C | 0.559726  | 1.628012  | 0.325143  |
| C | 1.591593  | 0.608168  | 0.682058  |
| H | 1.372390  | -1.317997 | 1.735514  |
| H | -0.697232 | -2.132007 | 0.533392  |
| H | 0.874387  | 2.663336  | 0.254641  |
| H | 2.132006  | 0.896014  | 1.588182  |
| O | -2.488214 | -0.203343 | -0.177878 |
| C | -3.062036 | -1.499545 | -0.170071 |
| H | -2.996096 | -1.939033 | 0.831120  |
| H | -4.105769 | -1.372034 | -0.452179 |
| H | -2.553087 | -2.145573 | -0.893109 |
| O | 1.925867  | -1.544135 | -0.181215 |
| O | 2.161633  | -0.532208 | -1.141721 |
| O | 2.620558  | 0.520498  | -0.320886 |
| H | -1.433420 | 2.039534  | -0.215143 |

---

## TS5

---

|   |          |          |          |
|---|----------|----------|----------|
| C | -0.45344 | -1.75213 | -0.77232 |
| C | 0.77378  | -1.43806 | -0.25473 |
| C | 1.18074  | -0.07979 | -0.13665 |
| C | 0.35405  | 0.94125  | -0.55563 |
| C | -0.96262 | 0.65682  | -0.97054 |
| C | -1.38758 | -0.71474 | -1.06568 |
| H | -0.7513  | -2.78658 | -0.89533 |
| H | 1.45325  | -2.23012 | 0.03881  |
| H | -1.52448 | 1.43974  | -1.4653  |
| H | -2.26067 | -0.9366  | -1.66735 |
| O | 2.3976   | 0.32721  | 0.33105  |
| C | 3.34397  | -0.66087 | 0.69522  |
| H | 3.59584  | -1.29769 | -0.15996 |
| H | 4.23201  | -0.12004 | 1.01947  |
| H | 2.97053  | -1.27644 | 1.52083  |
| O | -2.52553 | -0.85286 | 0.57876  |
| O | -1.94355 | 0.01107  | 1.3374   |
| O | -1.98524 | 1.17953  | 0.79488  |
| H | 0.66636  | 1.96436  | -0.53128 |

---

## IM5

---

|   |           |           |           |
|---|-----------|-----------|-----------|
| C | 0.534496  | -1.841482 | 0.201186  |
| C | -0.696663 | -1.544839 | -0.225291 |
| C | -1.213930 | -0.177996 | -0.184574 |
| C | -0.453863 | 0.849265  | 0.219458  |
| C | 0.959567  | 0.679849  | 0.681316  |
| C | 1.470736  | -0.797086 | 0.741832  |
| H | 0.927288  | -2.851334 | 0.143016  |
| H | -1.344528 | -2.311895 | -0.640944 |
| H | 1.093618  | 1.198761  | 1.635045  |
| H | 1.811626  | -1.055003 | 1.748888  |
| O | -2.485830 | 0.095818  | -0.641138 |
| C | -3.518583 | -0.453563 | 0.171463  |
| H | -3.477512 | -0.031270 | 1.182290  |
| H | -4.463813 | -0.191508 | -0.304318 |
| H | -3.434037 | -1.544155 | 0.233334  |
| O | 2.669882  | -0.725398 | -0.039151 |
| O | 2.324327  | 0.229696  | -1.019432 |
| O | 1.884577  | 1.308202  | -0.214328 |
| H | -0.787315 | 1.865912  | 0.231237  |

---

## TS6

---

|   |           |           |           |
|---|-----------|-----------|-----------|
| C | -0.357339 | 2.246888  | -0.115926 |
| C | 0.877630  | 1.556344  | -0.287622 |
| C | 0.999521  | 0.283190  | 0.193442  |
| C | -0.143018 | -0.384010 | 0.770930  |
| C | -1.361702 | 0.336409  | 0.967498  |
| C | -1.419931 | 1.686837  | 0.545640  |
| H | -0.431257 | 3.263722  | -0.488339 |
| H | 1.703649  | 2.048479  | -0.786026 |
| H | -2.065121 | -0.071439 | 1.683439  |
| H | -2.328815 | 2.252110  | 0.714892  |
| O | 2.095972  | -0.510460 | 0.160824  |
| C | 3.225304  | -0.025375 | -0.545545 |
| H | 3.606201  | 0.890321  | -0.080427 |
| H | 3.979237  | -0.808624 | -0.486932 |
| H | 2.964840  | 0.167009  | -1.591715 |
| O | -2.462134 | -0.679676 | -0.479497 |
| O | -1.587302 | -0.630403 | -1.422086 |
| O | -0.523131 | -1.274576 | -1.080334 |
| H | -0.077717 | -1.414657 | 1.050932  |

---

## IM6

---

|   |           |           |           |
|---|-----------|-----------|-----------|
| C | 1.094100  | -0.871841 | 0.776479  |
| C | -0.357088 | -1.104550 | 0.483750  |
| C | -1.171966 | -0.103169 | 0.133859  |
| C | -0.707114 | 1.301917  | 0.055597  |
| C | 0.559726  | 1.628012  | 0.325143  |
| C | 1.591593  | 0.608168  | 0.682058  |
| H | 1.372390  | -1.317997 | 1.735514  |
| H | -0.697232 | -2.132007 | 0.533392  |
| H | 0.874387  | 2.663336  | 0.254641  |
| H | 2.132006  | 0.896014  | 1.588182  |
| O | -2.488214 | -0.203343 | -0.177878 |
| C | -3.062036 | -1.499545 | -0.170071 |
| H | -2.996096 | -1.939033 | 0.831120  |
| H | -4.105769 | -1.372034 | -0.452179 |
| H | -2.553087 | -2.145573 | -0.893109 |
| O | 1.925867  | -1.544135 | -0.181215 |
| O | 2.161633  | -0.532208 | -1.141721 |
| O | 2.620558  | 0.520498  | -0.320886 |
| H | -1.433420 | 2.039534  | -0.215143 |

---

## TS7

---

|   |           |           |           |
|---|-----------|-----------|-----------|
| C | -2.022363 | 1.432569  | -0.164844 |
| C | -0.722470 | 1.725427  | -0.153665 |
| C | 0.372240  | 0.681077  | -0.290006 |
| C | -0.332642 | -0.772264 | 0.573935  |
| C | -1.724859 | -0.984487 | 0.075272  |
| C | -2.511217 | 0.046749  | -0.229164 |
| H | -2.753788 | 2.234167  | -0.130518 |
| H | -0.355263 | 2.744575  | -0.084160 |
| H | -2.049578 | -2.018861 | 0.006031  |
| H | -3.538297 | -0.127162 | -0.534311 |
| O | 1.436613  | 1.023316  | 0.569701  |
| C | 2.732089  | 0.647488  | 0.102059  |
| H | 2.956633  | 1.146035  | -0.843972 |
| H | 3.428526  | 0.972669  | 0.874872  |
| H | 2.803103  | -0.435011 | -0.040814 |
| O | 0.607261  | -1.639853 | 0.096097  |
| O | 0.546029  | -1.667965 | -1.212916 |
| O | 0.648070  | 0.243517  | -1.451359 |
| H | -0.345424 | -0.849214 | 1.641088  |

---

## IM7

---

|   |           |           |           |
|---|-----------|-----------|-----------|
| C | 1.159137  | 2.001643  | -0.298398 |
| C | 1.989813  | 1.017494  | 0.077951  |
| C | 1.810247  | -0.459221 | 0.016788  |
| C | -1.366536 | 0.392616  | 0.572749  |
| C | -1.270689 | 1.273706  | -0.580186 |
| C | -0.176602 | 1.969098  | -0.916706 |
| H | 1.558509  | 3.011481  | -0.206560 |
| H | 2.964723  | 1.286294  | 0.471971  |
| H | -2.166875 | 1.278581  | -1.190737 |
| H | -0.275485 | 2.634673  | -1.773336 |
| O | 0.627922  | -0.846906 | -0.469901 |
| C | 0.392257  | -2.262408 | -0.558670 |
| H | 0.555376  | -2.725719 | 0.416895  |
| H | -0.647506 | -2.349873 | -0.874138 |
| H | 1.079341  | -2.701949 | -1.284146 |
| O | -2.088726 | -0.633745 | 0.585604  |
| O | -2.645807 | -1.001796 | -0.664209 |
| O | 2.671195  | -1.226297 | 0.384011  |
| H | -0.904274 | 0.622717  | 1.398254  |

---

## TS8

---

|   |           |           |           |
|---|-----------|-----------|-----------|
| C | -1.459053 | -1.080410 | -1.272134 |
| C | -0.554350 | -0.149489 | -1.579198 |
| C | 0.211823  | 0.622062  | -0.545182 |
| C | 0.441501  | -0.531542 | 0.912717  |
| C | -0.921819 | -1.158253 | 1.118489  |
| C | -1.745572 | -1.467401 | 0.116451  |
| H | -2.020918 | -1.560245 | -2.067882 |
| H | -0.344536 | 0.145407  | -2.604805 |
| H | -1.146990 | -1.398646 | 2.153786  |
| H | -2.667321 | -2.003734 | 0.319417  |
| O | -0.253568 | 1.841258  | -0.198577 |
| C | -1.538070 | 1.913000  | 0.415436  |
| H | -1.481198 | 1.523783  | 1.435702  |
| H | -1.791797 | 2.971708  | 0.430940  |
| H | -2.282980 | 1.359643  | -0.163757 |
| O | 1.363436  | -1.307646 | 0.492024  |
| O | 2.050962  | -0.416441 | -1.054450 |
| O | 1.537194  | 0.756510  | -0.767718 |
| H | 0.664790  | 0.128882  | 1.724432  |

---

## IM8

---

|   |           |           |           |
|---|-----------|-----------|-----------|
| C | 1.139745  | -1.413876 | 1.055354  |
| C | -0.097244 | -1.049151 | 1.407498  |
| C | -1.037420 | -0.473165 | 0.442589  |
| C | 1.267553  | 1.251362  | -0.374451 |
| C | 1.728174  | -0.045172 | -0.935887 |
| C | 1.672230  | -1.223347 | -0.303202 |
| H | 1.794527  | -1.854009 | 1.804425  |
| H | -0.445386 | -1.095493 | 2.434028  |
| H | 2.016845  | -0.001016 | -1.980649 |
| H | 1.998876  | -2.118554 | -0.825692 |
| O | -1.661155 | 0.616495  | 0.833773  |
| C | -2.537962 | 1.251454  | -0.118658 |
| H | -3.336163 | 0.563888  | -0.403602 |
| H | -2.934589 | 2.120020  | 0.401509  |
| H | -1.956556 | 1.548642  | -0.993477 |
| O | 0.554492  | 2.024248  | -0.976921 |
| O | -0.701776 | -2.128254 | -1.106533 |
| O | -1.321607 | -0.938384 | -0.691755 |
| H | 1.627914  | 1.458984  | 0.611416  |

---

## TS9

---

|   |           |           |           |
|---|-----------|-----------|-----------|
| C | -1.539275 | 1.243643  | -0.634797 |
| C | -1.014399 | -0.133080 | -0.811853 |
| C | 0.287471  | -0.370028 | 0.451972  |
| C | 1.173553  | 0.874042  | 0.239308  |
| C | 0.708827  | 2.074313  | -0.130279 |
| C | -0.714112 | 2.267624  | -0.396527 |
| H | -2.616623 | 1.356918  | -0.718352 |
| H | -0.605878 | -0.381248 | -1.793678 |
| H | 1.390885  | 2.916786  | -0.147778 |
| H | -1.108911 | 3.277662  | -0.348895 |
| O | 1.006245  | -1.544597 | 0.155781  |
| C | 1.479772  | -1.732141 | -1.169502 |
| H | 1.858333  | -0.799291 | -1.606825 |
| H | 2.296244  | -2.452656 | -1.107670 |
| H | 0.692974  | -2.149595 | -1.807278 |
| O | -0.375024 | -0.440143 | 1.525495  |
| O | -2.186470 | -0.880666 | 0.838723  |
| O | -1.765441 | -1.151294 | -0.364525 |
| H | 2.206055  | 0.702814  | 0.461841  |

---

## IM9

---

|   |           |           |           |
|---|-----------|-----------|-----------|
| C | -1.622779 | 1.240131  | 0.051709  |
| C | -1.588115 | 0.016332  | -0.694870 |
| C | 1.141538  | -0.276605 | 0.871224  |
| C | 1.478316  | 0.728919  | -0.214048 |
| C | 0.748597  | 1.821585  | -0.492053 |
| C | -0.576821 | 2.096820  | 0.053505  |
| H | -2.555067 | 1.459998  | 0.559887  |
| H | -0.847620 | -0.178237 | -1.466874 |
| H | 1.210343  | 2.570070  | -1.132789 |
| H | -0.722147 | 3.084727  | 0.485989  |
| O | 1.466203  | -1.560225 | 0.591638  |
| C | 1.146135  | -2.111938 | -0.692108 |
| H | 1.342989  | -1.402103 | -1.501091 |
| H | 1.784427  | -2.986240 | -0.811602 |
| H | 0.097836  | -2.421108 | -0.697882 |
| O | 0.772795  | 0.051374  | 1.961457  |
| O | -3.430196 | -0.763023 | 0.339767  |
| O | -2.459580 | -0.893160 | -0.598385 |
| H | 2.414362  | 0.570764  | -0.707712 |

---



## TS10

---

|   |           |           |           |
|---|-----------|-----------|-----------|
| C | -0.885778 | 1.944222  | -0.369845 |
| C | -1.335429 | 0.559856  | -0.801928 |
| C | 0.188330  | -0.446880 | -0.454280 |
| C | 0.560424  | -0.128221 | 0.982366  |
| C | 0.485821  | 1.106645  | 1.474744  |
| C | -0.080761 | 2.190523  | 0.667501  |
| H | -1.285461 | 2.757298  | -0.970351 |
| H | -1.350644 | 0.430216  | -1.896362 |
| H | 0.825305  | 1.288745  | 2.488909  |
| H | 0.150096  | 3.215022  | 0.944594  |
| O | 1.065341  | -0.231025 | -1.445495 |
| C | 2.404417  | 0.154386  | -1.104338 |
| H | 2.831803  | -0.539495 | -0.376458 |
| H | 2.957451  | 0.105236  | -2.040616 |
| H | 2.418221  | 1.174045  | -0.712698 |
| O | -0.420080 | -1.640397 | -0.602119 |
| O | -1.354247 | -1.748295 | 0.329150  |
| O | -2.242954 | -0.047648 | -0.131291 |
| H | 0.965575  | -0.957028 | 1.524428  |

---

## IM10

---

|   |           |           |           |
|---|-----------|-----------|-----------|
| C | 2.429957  | 0.084369  | -0.652597 |
| C | 1.878054  | 1.452889  | -0.517720 |
| C | -0.885235 | -0.159417 | 0.349125  |
| C | -0.040197 | -0.688974 | 1.404991  |
| C | 1.246653  | -1.057805 | 1.282914  |
| C | 2.164603  | -0.963550 | 0.145852  |
| H | 3.187069  | -0.044146 | -1.422974 |
| H | 2.393512  | 2.222214  | -1.123294 |
| H | 1.693640  | -1.545910 | 2.149273  |
| H | 2.769738  | -1.857861 | -0.011444 |
| O | -0.580379 | -0.204274 | -0.930099 |
| C | -0.733633 | -1.476478 | -1.579197 |
| H | -0.172401 | -2.253162 | -1.042653 |
| H | -1.794168 | -1.732124 | -1.651474 |
| H | -0.309456 | -1.333627 | -2.568315 |
| O | -2.182419 | 0.404905  | 0.784158  |
| O | -3.061035 | 0.793856  | -0.172855 |
| O | 0.971090  | 1.770544  | 0.219443  |
| H | -0.549893 | -0.814178 | 2.357450  |

---

## TS11

---

|   |           |           |           |
|---|-----------|-----------|-----------|
| C | 1.532406  | 0.344674  | 0.818603  |
| C | 0.278513  | -0.932681 | 0.304734  |
| C | -0.986253 | -0.091890 | 0.238218  |
| C | -1.053215 | 1.213948  | -0.062709 |
| C | 0.143602  | 1.982412  | -0.389360 |
| C | 1.353201  | 1.525374  | -0.063572 |
| H | 1.402681  | 0.487329  | 1.893074  |
| H | 0.291960  | -1.559156 | 1.214295  |
| H | 0.009000  | 2.892145  | -0.965634 |
| H | 2.271848  | 1.983792  | -0.420957 |
| O | -2.150928 | -0.748529 | 0.545751  |
| C | -2.397000 | -1.907897 | -0.255396 |
| H | -1.604714 | -2.651436 | -0.123486 |
| H | -3.347527 | -2.316504 | 0.086087  |
| H | -2.455574 | -1.632316 | -1.313199 |
| O | 0.776782  | -1.441235 | -0.755660 |
| O | 2.658363  | -0.677585 | -0.711635 |
| O | 2.587667  | -0.430420 | 0.569906  |
| H | -1.979589 | 1.745316  | -0.128883 |

---

## IM11

---

|   |           |           |           |
|---|-----------|-----------|-----------|
| C | -1.957757 | -0.007575 | -0.569912 |
| C | 0.756365  | -1.573046 | 0.228916  |
| C | 1.338296  | -0.274776 | -0.134709 |
| C | 0.843137  | 0.978145  | 0.070040  |
| C | -0.410245 | 1.389574  | 0.714309  |
| C | -1.652583 | 0.938508  | 0.473101  |
| H | -1.235748 | -0.338473 | -1.310324 |
| H | 1.447646  | -2.417478 | 0.035606  |
| H | -0.274388 | 2.199834  | 1.427194  |
| H | -2.505749 | 1.313489  | 1.027287  |
| O | 2.590191  | -0.330675 | -0.728820 |
| C | 3.652403  | -0.609234 | 0.188740  |
| H | 3.514552  | -1.586018 | 0.662907  |
| H | 4.572521  | -0.616568 | -0.395413 |
| H | 3.704138  | 0.163787  | 0.964504  |
| O | -0.352023 | -1.769853 | 0.682360  |
| O | -4.098502 | -0.151112 | 0.119500  |
| O | -3.113616 | -0.477177 | -0.745695 |
| H | 1.440734  | 1.824501  | -0.197279 |

---

## TS12

---

|   |           |           |           |
|---|-----------|-----------|-----------|
| C | 1.934174  | -0.428305 | 0.310210  |
| C | 0.145151  | -0.746781 | 0.819821  |
| C | -0.689673 | 0.283922  | 0.141664  |
| C | -0.268404 | 1.540608  | -0.061645 |
| C | 1.084496  | 1.962354  | 0.295696  |
| C | 2.063257  | 1.076705  | 0.488711  |
| H | 2.422269  | -0.997921 | 1.119334  |
| H | 0.135976  | -0.803865 | 1.910129  |
| H | 1.259717  | 3.031037  | 0.375643  |
| H | 3.059495  | 1.413084  | 0.765047  |
| O | -1.904289 | -0.090391 | -0.371112 |
| C | -2.775098 | -0.769754 | 0.528492  |
| H | -2.901497 | -0.193215 | 1.452421  |
| H | -3.731912 | -0.862868 | 0.015595  |
| H | -2.395232 | -1.770341 | 0.760189  |
| O | 0.099002  | -1.972161 | 0.296629  |
| O | 0.236915  | -1.912850 | -0.999650 |
| O | 1.995799  | -0.930507 | -0.861894 |
| H | -0.883024 | 2.286243  | -0.521179 |

---

## IM12

---

|   |           |           |           |
|---|-----------|-----------|-----------|
| C | 2.613888  | -1.134913 | -0.408348 |
| C | -0.428991 | -0.852397 | 0.696301  |
| C | -0.519243 | 0.419423  | 0.028330  |
| C | 0.550130  | 1.274017  | 0.032702  |
| C | 1.879948  | 1.074028  | 0.605729  |
| C | 2.737869  | 0.041848  | 0.486598  |
| H | 3.583261  | -1.590475 | -0.687139 |
| H | 0.374175  | -1.009478 | 1.410860  |
| H | 2.224195  | 1.954640  | 1.147114  |
| H | 3.704371  | 0.141316  | 0.974693  |
| O | -1.639829 | 0.912232  | -0.564434 |
| C | -2.826965 | 0.885405  | 0.242400  |
| H | -2.664880 | 1.467755  | 1.156980  |
| H | -3.604506 | 1.351308  | -0.362140 |
| H | -3.098143 | -0.151137 | 0.456550  |
| O | -1.175953 | -1.858100 | 0.572977  |
| O | -2.169288 | -1.856982 | -0.360918 |
| O | 1.579821  | -1.582724 | -0.850911 |
| H | 0.430438  | 2.258747  | -0.368397 |

---

## TS13

---

|   |           |           |           |
|---|-----------|-----------|-----------|
| C | 0.919146  | -1.366064 | 0.142837  |
| C | -0.592636 | -1.237521 | 0.198290  |
| C | -1.251931 | -0.078281 | 0.109703  |
| C | -0.555544 | 1.224868  | 0.009795  |
| C | 0.736839  | 1.338925  | 0.322033  |
| C | 1.504402  | 0.233446  | 0.934327  |
| H | 1.307818  | -2.067481 | 0.899515  |
| H | -1.121282 | -2.183330 | 0.251156  |
| H | 1.278607  | 2.260349  | 0.127957  |
| H | 1.441580  | 0.084086  | 2.014227  |
| O | -2.599456 | 0.086676  | 0.045847  |
| C | -3.397508 | -1.084791 | 0.014697  |
| H | -3.272351 | -1.655918 | 0.940997  |
| H | -4.428815 | -0.747574 | -0.074250 |
| H | -3.127630 | -1.707020 | -0.845125 |
| O | 1.509636  | -1.361759 | -0.989702 |
| O | 2.832529  | 0.145832  | -0.770021 |
| O | 2.768209  | 0.090343  | 0.531623  |
| H | -1.122269 | 2.054034  | -0.359266 |

---

## IM13

---

|   |           |           |           |
|---|-----------|-----------|-----------|
| C | -0.520827 | 2.153136  | 0.108993  |
| C | -1.428770 | 1.032813  | -0.209670 |
| C | -1.326516 | -0.253916 | 0.199680  |
| C | -0.210182 | -0.911965 | 0.936211  |
| C | 1.099525  | -0.880960 | 0.611700  |
| C | 1.598076  | -0.214880 | -0.546900 |
| H | -0.986226 | 3.143567  | -0.058930 |
| H | -2.340874 | 1.336603  | -0.711015 |
| H | 1.819757  | -1.427122 | 1.209924  |
| H | 0.968165  | 0.288454  | -1.273589 |
| O | -2.323776 | -1.159139 | 0.073649  |
| C | -3.541339 | -0.771867 | -0.550097 |
| H | -3.360222 | -0.468347 | -1.585557 |
| H | -4.175571 | -1.655938 | -0.530143 |
| H | -4.014139 | 0.045003  | 0.004669  |
| O | 0.612881  | 2.080406  | 0.527952  |
| O | 3.712291  | -0.802846 | -0.014387 |
| O | 2.822003  | -0.202154 | -0.852938 |
| H | -0.517877 | -1.506515 | 1.770917  |

---

## TS14

---

|   |           |           |           |
|---|-----------|-----------|-----------|
| C | 0.916550  | -0.450889 | 0.972430  |
| C | -0.459395 | -0.688215 | 0.475999  |
| C | -1.265616 | 0.330406  | 0.161781  |
| C | -0.777179 | 1.727030  | 0.152217  |
| C | 0.527898  | 2.001558  | 0.095762  |
| C | 1.627680  | 0.961634  | -0.009805 |
| H | 1.055926  | -0.194541 | 2.024303  |
| H | -0.739087 | -1.730281 | 0.359355  |
| H | 0.850092  | 3.038185  | 0.070798  |
| H | 2.490449  | 1.197528  | 0.635040  |
| O | -2.563332 | 0.251876  | -0.209403 |
| C | -3.136761 | -1.044193 | -0.288093 |
| H | -3.092469 | -1.539514 | 0.687941  |
| H | -4.173086 | -0.900524 | -0.588361 |
| H | -2.610329 | -1.645355 | -1.036288 |
| O | 1.835562  | -1.337346 | 0.585105  |
| O | 1.726435  | -1.548414 | -0.700721 |
| O | 1.893465  | 0.415313  | -1.136378 |
| H | -1.517598 | 2.499094  | 0.176655  |

---

## IM14

---

|   |           |           |           |
|---|-----------|-----------|-----------|
| C | 1.491703  | -0.411321 | -0.623133 |
| C | 0.732937  | 0.654794  | -0.047183 |
| C | -0.616450 | 0.646019  | 0.010511  |
| C | -1.529778 | -0.434629 | -0.458023 |
| C | -1.480221 | -1.755676 | -0.175971 |
| C | -0.605917 | -2.441152 | 0.786173  |
| H | 1.057406  | -1.295243 | -1.078223 |
| H | 1.327275  | 1.493486  | 0.293080  |
| H | -2.284713 | -2.351272 | -0.597866 |
| H | -0.978881 | -3.441321 | 1.078137  |
| O | -1.363198 | 1.699645  | 0.400062  |
| C | -0.689808 | 2.883311  | 0.822455  |
| H | -0.072475 | 3.280224  | 0.010719  |
| H | -1.474965 | 3.590055  | 1.083258  |
| H | -0.067952 | 2.671427  | 1.696567  |
| O | 2.749815  | -0.368749 | -0.691719 |
| O | 3.398112  | 0.706199  | -0.156283 |
| O | 0.423667  | -2.016244 | 1.271133  |
| H | -2.338826 | -0.083457 | -1.063845 |

---

## TS15

---

|   |           |           |           |
|---|-----------|-----------|-----------|
| C | -0.337854 | 2.101623  | 0.225127  |
| C | 0.897007  | 1.629736  | 0.036875  |
| C | 1.174780  | 0.201756  | -0.094643 |
| C | 0.282321  | -0.735082 | 0.250738  |
| C | -1.007222 | -0.427288 | 0.932335  |
| C | -1.603948 | 1.264028  | 0.224838  |
| H | -0.507207 | 3.169876  | 0.334629  |
| H | 1.738099  | 2.313435  | -0.041127 |
| H | -1.004606 | -0.350867 | 2.019659  |
| H | -2.298094 | 1.510092  | 1.046333  |
| O | 2.347892  | -0.223705 | -0.678978 |
| C | 3.499219  | -0.037898 | 0.139649  |
| H | 3.398512  | -0.596774 | 1.077205  |
| H | 4.349871  | -0.413610 | -0.429206 |
| H | 3.656867  | 1.022567  | 0.364698  |
| O | -2.122967 | 0.927493  | -0.887317 |
| O | -2.128682 | -1.104115 | -0.787262 |
| O | -2.070958 | -1.095946 | 0.510606  |
| H | 0.434007  | -1.784922 | 0.110287  |

---

## IM15

---

|   |           |           |           |
|---|-----------|-----------|-----------|
| C | 1.471682  | -1.204603 | 0.543316  |
| C | 0.462237  | -0.476449 | 1.047244  |
| C | -0.138554 | 0.658094  | 0.301760  |
| C | -1.258502 | 0.653727  | -0.479782 |
| C | -2.165770 | -0.423707 | -0.712111 |
| C | 1.988787  | -1.020799 | -0.824678 |
| H | 1.948119  | -1.977956 | 1.138955  |
| H | 0.105788  | -0.649871 | 2.056453  |
| H | -2.749519 | -0.425315 | -1.629095 |
| H | 1.443289  | -0.295268 | -1.463620 |
| O | 0.555210  | 1.821856  | 0.209599  |
| C | 1.723756  | 2.026059  | 1.005025  |
| H | 2.550663  | 1.403943  | 0.653995  |
| H | 1.970149  | 3.079531  | 0.883807  |
| H | 1.516984  | 1.807641  | 2.055712  |
| O | 2.956283  | -1.609575 | -1.255708 |
| O | -1.838322 | -1.381666 | 1.288874  |
| O | -2.436199 | -1.379645 | 0.068579  |
| H | -1.482437 | 1.491617  | -1.106435 |

---

## TS16

---

|   |          |          |          |
|---|----------|----------|----------|
| C | 0.67938  | -1.59725 | -0.05134 |
| C | -0.56854 | -1.40564 | -0.48759 |
| C | -1.25478 | -0.14428 | -0.24218 |
| C | -0.58    | 0.97486  | 0.0704   |
| C | 0.92629  | 1.0861   | 0.22491  |
| C | 1.34785  | -0.62436 | 0.84937  |
| H | 1.28765  | -2.44404 | -0.35774 |
| H | -1.06541 | -2.14667 | -1.10765 |
| H | 1.19163  | 1.68521  | 1.11104  |
| H | 1.09098  | -0.63947 | 1.91051  |
| O | -2.61017 | -0.02655 | -0.47175 |
| C | -3.40932 | -0.87113 | 0.34966  |
| H | -3.23913 | -0.65011 | 1.40978  |
| H | -4.44812 | -0.66877 | 0.08856  |
| H | -3.18703 | -1.92721 | 0.1608   |
| O | 2.6625   | -0.47241 | 0.68371  |
| O | 2.92642  | -0.3452  | -0.59128 |
| O | 1.66398  | 1.20609  | -0.80956 |
| H | -1.06059 | 1.92082  | 0.20855  |

---

## IM16

---

|   |           |           |           |
|---|-----------|-----------|-----------|
| C | -1.232805 | -0.868229 | 0.637103  |
| C | 0.073912  | -0.913993 | 0.962468  |
| C | 1.195921  | -0.258926 | 0.292999  |
| C | 1.345775  | 1.046229  | -0.050766 |
| C | 0.408643  | 2.167196  | 0.213125  |
| C | -1.710722 | -0.236869 | -0.564109 |
| H | -1.987385 | -1.356359 | 1.243459  |
| H | 0.373223  | -1.529536 | 1.810554  |
| H | 0.911053  | 3.151495  | 0.180289  |
| H | -1.051246 | 0.148354  | -1.336537 |
| O | 2.346237  | -1.004776 | 0.165131  |
| C | 2.190790  | -2.289929 | -0.439295 |
| H | 1.756827  | -2.189530 | -1.439578 |
| H | 3.191369  | -2.714815 | -0.507693 |
| H | 1.557389  | -2.938896 | 0.171717  |
| O | -2.934231 | -0.142800 | -0.849515 |
| O | -3.855422 | -0.568481 | 0.047346  |
| O | -0.774228 | 2.063530  | 0.443112  |
| H | 2.276572  | 1.405351  | -0.437482 |

---

## TS17

---

|   |           |           |           |
|---|-----------|-----------|-----------|
| C | -0.697051 | 2.206072  | -0.133288 |
| C | 0.643496  | 1.616367  | -0.179749 |
| C | 0.845031  | 0.335077  | 0.157557  |
| C | -0.247270 | -0.540940 | 0.719654  |
| C | -1.869787 | -0.033521 | -0.181941 |
| C | -1.814753 | 1.476378  | -0.101277 |
| H | -0.762054 | 3.290329  | -0.130093 |
| H | 1.473333  | 2.234902  | -0.500886 |
| H | -2.544325 | -0.492732 | 0.560878  |
| H | -2.785813 | 1.961461  | -0.039136 |
| O | 2.000156  | -0.355716 | 0.146686  |
| C | 3.107272  | 0.261680  | -0.488814 |
| H | 3.424942  | 1.153226  | 0.064199  |
| H | 3.905510  | -0.478466 | -0.484495 |
| H | 2.847668  | 0.532622  | -1.517658 |
| O | -1.762759 | -0.603301 | -1.314287 |
| O | -0.178633 | -1.799815 | -1.042319 |
| O | -0.272087 | -1.791528 | 0.266903  |
| H | -0.419949 | -0.502396 | 1.774925  |

---

## IM17

---

|   |           |           |           |
|---|-----------|-----------|-----------|
| C | 1.063977  | -0.275794 | -1.516499 |
| C | -0.307218 | -0.692655 | -1.172802 |
| C | -1.025618 | -0.120133 | -0.197775 |
| C | -0.591506 | 1.057704  | 0.581890  |
| C | 2.088855  | -1.083707 | 0.611079  |
| C | 2.130849  | -0.447380 | -0.715405 |
| H | 1.203221  | 0.141847  | -2.509792 |
| H | -0.730436 | -1.527454 | -1.726184 |
| H | 1.115232  | -1.503493 | 0.935014  |
| H | 3.112893  | -0.119190 | -1.043159 |
| O | -2.218707 | -0.548627 | 0.310467  |
| C | -2.767225 | -1.734873 | -0.243718 |
| H | -2.067352 | -2.570244 | -0.128029 |
| H | -3.682295 | -1.931542 | 0.311792  |
| H | -3.002005 | -1.587402 | -1.302712 |
| O | 3.061194  | -1.183140 | 1.329405  |
| O | 0.325744  | 2.105687  | -1.217388 |
| O | 0.031610  | 2.050652  | 0.142087  |
| H | -0.833321 | 1.062465  | 1.624196  |

---



## TS18

---

|   |           |           |           |
|---|-----------|-----------|-----------|
| C | 0.057042  | 2.212917  | 0.072556  |
| C | -1.176456 | 1.430435  | 0.051773  |
| C | -1.145383 | 0.085388  | 0.023644  |
| C | 0.152768  | -0.737383 | 0.066052  |
| C | 1.321165  | 0.319014  | -0.824258 |
| C | 1.238384  | 1.690920  | -0.267844 |
| H | -0.002107 | 3.241851  | 0.413709  |
| H | -2.120605 | 1.954209  | 0.133026  |
| H | 1.102403  | 0.177202  | -1.885313 |
| H | 2.176502  | 2.228541  | -0.161387 |
| O | -2.198515 | -0.739911 | 0.043146  |
| C | -3.486510 | -0.149997 | 0.040610  |
| H | -3.619216 | 0.477550  | -0.847897 |
| H | -4.194044 | -0.977037 | 0.022241  |
| H | -3.637813 | 0.450888  | 0.944507  |
| O | 2.397777  | -0.414962 | -0.483965 |
| O | 2.555690  | -0.361351 | 0.811859  |
| O | 0.706093  | -0.881301 | 1.207349  |
| H | 0.065096  | -1.604467 | -0.554737 |

---

## IM18

---

|   |           |           |           |
|---|-----------|-----------|-----------|
| C | -0.587695 | -1.401338 | 1.027269  |
| C | 0.735318  | -1.242346 | 0.409809  |
| C | 1.410832  | -0.128155 | 0.070690  |
| C | 0.947085  | 1.291802  | 0.306567  |
| C | -1.950713 | -0.174075 | -0.589402 |
| C | -1.782809 | -0.934660 | 0.619241  |
| H | -0.587458 | -2.062944 | 1.892262  |
| H | 1.268667  | -2.183962 | 0.300412  |
| H | -1.140949 | 0.035824  | -1.281099 |
| H | -2.691180 | -1.157343 | 1.166226  |
| O | 2.670015  | -0.121442 | -0.448362 |
| C | 3.323451  | -1.357533 | -0.687699 |
| H | 2.742938  | -1.968866 | -1.386551 |
| H | 4.286810  | -1.106113 | -1.127622 |
| H | 3.473372  | -1.901238 | 0.251223  |
| O | -3.065421 | 0.269565  | -0.975345 |
| O | -4.158759 | 0.079840  | -0.197874 |
| O | -0.258050 | 1.521838  | 0.586394  |
| H | 1.643674  | 2.100886  | 0.235527  |

---

## TS7-1

|   |           |           |           |
|---|-----------|-----------|-----------|
| C | 0.000000  | 0.000000  | 0.000000  |
| C | 0.000000  | 0.000000  | 1.343092  |
| C | 1.144425  | 0.000000  | 2.298018  |
| C | 2.426043  | -1.855415 | -0.112943 |
| C | 2.177020  | -0.770572 | -1.061825 |
| C | 1.098743  | 0.021593  | -0.979844 |
| H | -0.982573 | 0.076433  | -0.466014 |
| H | -0.953770 | 0.042747  | 1.859449  |
| H | 2.931115  | -0.627783 | -1.826299 |
| H | 0.980045  | 0.774101  | -1.758325 |
| O | 2.337297  | -0.117394 | 1.709883  |
| C | 3.490793  | -0.152875 | 2.567205  |
| H | 3.370817  | -0.942773 | 3.311301  |
| H | 4.326636  | -0.357405 | 1.898035  |
| H | 3.599446  | 0.808565  | 3.072614  |
| O | 3.541554  | -2.283516 | 0.189617  |
| O | 4.746224  | -1.257029 | -0.276853 |
| O | 0.984550  | 0.089798  | 3.492921  |
| N | 5.521993  | -0.085103 | -1.592251 |
| O | 5.188722  | 0.378476  | -2.598092 |
| H | 1.600608  | -2.329218 | 0.296402  |

## P1

|   |           |           |           |
|---|-----------|-----------|-----------|
| C | -0.146304 | 2.180331  | -0.099677 |
| C | 1.051186  | 1.675065  | 0.224468  |
| C | 1.535192  | 0.277573  | 0.081492  |
| C | -1.517357 | -0.697287 | 0.399795  |
| C | -1.921713 | 0.383948  | -0.530511 |
| C | -1.323048 | 1.564533  | -0.734385 |
| H | -0.277367 | 3.244601  | 0.093655  |
| H | 1.781429  | 2.319144  | 0.703842  |
| H | -2.782110 | 0.114075  | -1.133967 |
| H | -1.797600 | 2.213389  | -1.470010 |
| O | 0.903415  | -0.428629 | -0.865235 |
| C | 1.304386  | -1.797045 | -0.986342 |
| H | 1.175381  | -2.314101 | -0.032544 |
| H | 0.648731  | -2.226557 | -1.741153 |
| H | 2.351294  | -1.857017 | -1.290546 |
| O | -1.802827 | -1.858750 | 0.217774  |
| O | 2.431329  | -0.170595 | 0.760002  |
| H | -0.968978 | -0.369513 | 1.258133  |

## TS7-2

---

|   |           |           |           |
|---|-----------|-----------|-----------|
| C | -0.573297 | 2.122981  | -0.043863 |
| C | -1.622882 | 1.444928  | -0.523154 |
| C | -1.960304 | 0.019026  | -0.276661 |
| C | 1.502253  | -0.311818 | -0.216485 |
| C | 1.396570  | 0.712293  | 0.809471  |
| C | 0.494088  | 1.705187  | 0.879763  |
| H | -0.507880 | 3.174716  | -0.323551 |
| H | -2.308376 | 1.933759  | -1.207824 |
| H | 2.176468  | 0.623015  | 1.554398  |
| H | 0.618525  | 2.383773  | 1.723417  |
| O | -1.484172 | -0.455096 | 0.881857  |
| C | -1.716796 | -1.846069 | 1.113611  |
| H | -1.237642 | -2.442146 | 0.332197  |
| H | -1.276149 | -2.059600 | 2.085642  |
| H | -2.787594 | -2.058597 | 1.115866  |
| O | 2.412898  | -1.210117 | -0.211450 |
| O | 3.530910  | -0.229445 | -0.228584 |
| O | -2.610812 | -0.642650 | -1.052684 |
| H | 0.812307  | -0.379982 | -0.900166 |

---

## IM7-2

---

|   |           |           |           |
|---|-----------|-----------|-----------|
| C | 0.804742  | 2.169285  | -0.077447 |
| C | 1.743088  | 1.307007  | 0.332511  |
| C | 1.776962  | -0.169077 | 0.174082  |
| C | -1.532566 | -0.029622 | 0.297956  |
| C | -1.421924 | 1.067844  | -0.696152 |
| C | -0.437374 | 1.958925  | -0.839791 |
| H | 0.998438  | 3.219224  | 0.140333  |
| H | 2.591439  | 1.680142  | 0.897302  |
| H | -2.268893 | 1.090483  | -1.374201 |
| H | -0.589573 | 2.702061  | -1.621658 |
| O | 1.016671  | -0.635999 | -0.826008 |
| C | 1.023106  | -2.057901 | -0.983130 |
| H | 0.681701  | -2.540067 | -0.064209 |
| H | 0.334919  | -2.264498 | -1.800883 |
| H | 2.030859  | -2.405718 | -1.219896 |
| O | -1.752212 | -1.303801 | -0.212725 |
| O | -2.806969 | -0.542286 | 0.503305  |
| O | 2.456694  | -0.880317 | 0.879402  |
| H | -0.903561 | 0.054956  | 1.159408  |

---

## TS7-2-1

---

|   |           |           |           |
|---|-----------|-----------|-----------|
| C | -1.110995 | 2.219308  | 0.177990  |
| C | -2.052706 | 1.565791  | -0.512789 |
| C | -2.361063 | 0.113388  | -0.496628 |
| C | 0.888394  | -0.358549 | 0.156296  |
| C | 0.691706  | 0.704626  | 1.190816  |
| C | -0.146400 | 1.745040  | 1.185476  |
| H | -1.065811 | 3.296300  | 0.016624  |
| H | -2.661694 | 2.112938  | -1.225350 |
| H | 1.325917  | 0.544253  | 2.058158  |
| H | -0.084077 | 2.401095  | 2.053681  |
| O | -1.997908 | -0.512962 | 0.629476  |
| C | -2.261339 | -1.918336 | 0.660629  |
| H | -1.744978 | -2.416723 | -0.162700 |
| H | -1.872116 | -2.266828 | 1.615494  |
| H | -3.335187 | -2.101196 | 0.580528  |
| O | 0.694673  | -1.646187 | 0.569245  |
| O | 2.179338  | -0.890272 | 0.125968  |
| O | -2.917064 | -0.442372 | -1.418168 |
| N | 3.496409  | 0.475209  | -0.468315 |
| O | 4.488016  | -0.047793 | -0.612584 |
| H | 0.491337  | -0.097293 | -0.802344 |

---

## IM7-2-1

---

|   |           |           |           |
|---|-----------|-----------|-----------|
| C | -0.827673 | 2.172155  | 0.297453  |
| C | -1.807978 | 1.690315  | -0.473645 |
| C | -2.278828 | 0.282921  | -0.550802 |
| C | 1.003594  | -0.546222 | 0.116909  |
| C | 0.795341  | 0.420383  | 1.262809  |
| C | 0.020401  | 1.513152  | 1.303229  |
| H | -0.632917 | 3.241637  | 0.220834  |
| H | -2.306501 | 2.350679  | -1.175926 |
| H | 1.383268  | 0.151393  | 2.133985  |
| H | 0.108508  | 2.090272  | 2.224535  |
| O | -2.149700 | -0.401990 | 0.628658  |
| C | -2.564851 | -1.769692 | 0.591572  |
| H | -2.033072 | -2.303036 | -0.197638 |
| H | -2.307595 | -2.180217 | 1.566205  |
| H | -3.640914 | -1.827497 | 0.412663  |
| O | 0.460186  | -1.689885 | 0.597204  |
| O | 2.405002  | -0.834370 | -0.070807 |
| O | -2.751965 | -0.192137 | -1.558716 |
| N | 3.098712  | 0.332516  | -0.419664 |
| O | 4.219432  | 0.082183  | -0.645112 |
| H | 0.579671  | -0.191148 | -0.799121 |

---

TS 7-2-1-NO<sub>2</sub>

|   |           |           |           |
|---|-----------|-----------|-----------|
| C | -1.512574 | 2.111903  | -0.231226 |
| C | -2.277688 | 1.177278  | -0.809124 |
| C | -2.347222 | -0.277349 | -0.517854 |
| C | 0.849545  | 0.008313  | 0.309976  |
| C | 0.453259  | 1.187418  | 1.122815  |
| C | -0.553981 | 2.031794  | 0.884064  |
| H | -1.642673 | 3.127088  | -0.605215 |
| H | -2.923662 | 1.462530  | -1.632985 |
| H | 1.053255  | 1.296779  | 2.020034  |
| H | -0.669280 | 2.838270  | 1.607520  |
| O | -1.849023 | -0.627232 | 0.676182  |
| C | -1.889661 | -2.027554 | 0.972537  |
| H | -1.336671 | -2.589740 | 0.216634  |
| H | -1.416748 | -2.133264 | 1.947039  |
| H | -2.924252 | -2.375479 | 0.995764  |
| O | 1.025481  | -1.107633 | 0.864306  |
| O | 2.646835  | 0.207270  | 0.389619  |
| O | -2.823803 | -1.071528 | -1.297128 |
| N | 3.164994  | -0.506679 | -0.643904 |
| O | 4.309429  | -0.249518 | -0.794692 |
| H | 0.985307  | 0.108137  | -0.746671 |

## TS7-2-2

|   |           |           |           |
|---|-----------|-----------|-----------|
| C | -0.015836 | 1.972336  | 0.375711  |
| C | -1.004379 | 1.611865  | -0.453785 |
| C | -1.741168 | 0.315022  | -0.482479 |
| C | 1.840804  | -0.464825 | -0.188121 |
| C | 1.406713  | 0.051674  | 1.194850  |
| C | 0.640842  | 1.153910  | 1.392336  |
| H | 0.327994  | 3.006327  | 0.331849  |
| H | -1.357542 | 2.317406  | -1.199200 |
| H | 1.718570  | -0.592599 | 2.010850  |
| H | 0.569252  | 1.524079  | 2.416804  |
| O | -1.796485 | -0.293636 | 0.707997  |
| C | -2.391852 | -1.595062 | 0.688821  |
| H | -1.801318 | -2.256788 | 0.051182  |
| H | -2.378423 | -1.938967 | 1.721262  |
| H | -3.414006 | -1.537372 | 0.310072  |
| O | 0.668173  | -1.079606 | -0.329318 |
| O | 2.672484  | -1.499062 | -0.252681 |
| O | -2.279053 | -0.097187 | -1.481831 |
| H | 2.081554  | 0.354694  | -0.832580 |

## P2

---

|   |           |           |           |
|---|-----------|-----------|-----------|
| C | -1.894624 | 1.636573  | -0.352607 |
| C | -2.112290 | 0.377961  | -0.763898 |
| C | -1.328264 | -0.814398 | -0.346089 |
| C | 2.032099  | 0.121633  | -0.240473 |
| C | 0.439867  | 1.700464  | 0.520344  |
| C | -0.816991 | 2.153454  | 0.500248  |
| H | -2.576194 | 2.395811  | -0.731963 |
| H | -2.888383 | 0.173719  | -1.494976 |
| H | 1.258231  | 2.122717  | 1.092956  |
| H | -1.025916 | 3.037512  | 1.092989  |
| O | -1.248501 | -0.938557 | 0.977674  |
| C | -0.463015 | -2.035509 | 1.454802  |
| H | 0.579799  | -1.916944 | 1.147974  |
| H | -0.546148 | -2.004631 | 2.539051  |
| H | -0.847744 | -2.976922 | 1.058704  |
| O | 0.762215  | 0.620194  | -0.256610 |
| O | 2.957370  | 0.626222  | 0.324152  |
| O | -0.822325 | -1.605755 | -1.120786 |
| H | 2.058434  | -0.706477 | -0.751973 |

---

CO<sub>2</sub>

---

|   |          |          |           |
|---|----------|----------|-----------|
| O | 0.000000 | 0.000000 | 1.162895  |
| C | 0.000000 | 0.000000 | 0.000000  |
| O | 0.000000 | 0.000000 | -1.162895 |

---

## TS7-3

|   |           |           |           |
|---|-----------|-----------|-----------|
| C | 0.835266  | 2.238803  | -0.036859 |
| C | -0.465104 | 1.930273  | -0.131473 |
| C | -0.973279 | 0.547260  | -0.324086 |
| C | 1.160212  | -1.077267 | 0.040697  |
| C | 2.131424  | 0.009550  | -0.106794 |
| C | 1.990969  | 1.347477  | -0.088850 |
| H | 1.089400  | 3.289450  | 0.072422  |
| H | -1.218358 | 2.709547  | -0.063228 |
| H | 3.126858  | -0.393831 | -0.274461 |
| H | 2.935831  | 1.881348  | -0.174703 |
| O | -2.293770 | 0.484675  | -0.071516 |
| C | -2.860997 | -0.819418 | -0.133464 |
| H | -2.743359 | -1.245029 | -1.132302 |
| H | -2.374907 | -1.460234 | 0.608282  |
| H | -3.915508 | -0.696497 | 0.108833  |
| O | 0.337057  | -1.249654 | 1.018447  |
| O | -0.202243 | -0.043923 | 1.452871  |
| O | -0.411190 | -0.294015 | -1.059794 |
| H | 1.405376  | -1.894596 | -0.428301 |

## IM7-3

|   |           |           |           |
|---|-----------|-----------|-----------|
| C | 0.689995  | 2.243545  | -0.098131 |
| C | -0.540676 | 1.768067  | -0.326567 |
| C | -0.819938 | 0.288389  | -0.245731 |
| C | 1.077916  | -0.899629 | -0.115844 |
| C | 2.093512  | 0.145872  | 0.262006  |
| C | 1.891691  | 1.471865  | 0.264151  |
| H | 0.840789  | 3.317083  | -0.175224 |
| H | -1.365950 | 2.414592  | -0.604532 |
| H | 3.053402  | -0.257180 | 0.569823  |
| H | 2.738105  | 2.081359  | 0.571216  |
| O | -2.085974 | -0.035588 | -0.682547 |
| C | -3.033238 | -0.426940 | 0.306237  |
| H | -2.730049 | -1.353616 | 0.799937  |
| H | -3.169854 | 0.355305  | 1.060156  |
| H | -3.965598 | -0.580320 | -0.235991 |
| O | 0.267979  | -1.271015 | 1.008216  |
| O | -0.553510 | -0.113502 | 1.113579  |
| O | 0.103565  | -0.434983 | -1.014788 |
| H | 1.566106  | -1.773773 | -0.493261 |



## TS7-3-1

---

|   |           |           |           |
|---|-----------|-----------|-----------|
| C | -1.339763 | 2.023854  | -0.182359 |
| C | -2.036079 | 0.946464  | -0.610206 |
| C | -1.827035 | -0.478558 | -0.279519 |
| C | 1.335847  | 0.246535  | 0.009989  |
| C | 0.973196  | 1.372108  | 0.755003  |
| C | -0.157652 | 2.155523  | 0.640814  |
| H | -1.760318 | 2.984949  | -0.479042 |
| H | -2.874915 | 1.100844  | -1.281176 |
| H | 1.705593  | 1.642599  | 1.508734  |
| H | -0.137574 | 3.066856  | 1.234114  |
| O | -1.192570 | -0.670342 | 0.889183  |
| C | -0.893220 | -2.028465 | 1.203939  |
| H | -0.235552 | -2.456042 | 0.441245  |
| H | -0.389960 | -2.003922 | 2.169412  |
| H | -1.808683 | -2.621355 | 1.255762  |
| O | 2.342069  | -0.502732 | 0.415076  |
| O | 3.368330  | -0.599687 | -0.751569 |
| O | -2.229013 | -1.389318 | -0.971248 |
| H | 4.072572  | -0.055934 | -0.365541 |
| H | 0.871622  | -0.019672 | -0.803473 |

---

## P3

---

|   |          |           |           |
|---|----------|-----------|-----------|
| C | 3.525333 | 0.166626  | -5.001053 |
| C | 2.241974 | 0.599822  | -5.196135 |
| C | 1.350986 | 1.294025  | -4.250266 |
| C | 2.660103 | -0.484580 | -2.080922 |
| C | 3.923138 | -0.181063 | -2.482656 |
| C | 4.316563 | 0.022932  | -3.828759 |
| H | 4.038185 | -0.140499 | -5.912793 |
| H | 1.793770 | 0.472050  | -6.176028 |
| H | 4.698471 | -0.167868 | -1.725291 |
| H | 5.387595 | -0.029386 | -4.004140 |
| O | 2.006944 | 2.035678  | -3.342771 |
| C | 1.189102 | 2.655643  | -2.350931 |
| H | 0.650414 | 1.897160  | -1.775777 |
| H | 1.874400 | 3.206164  | -1.708577 |
| H | 0.466536 | 3.328625  | -2.817272 |
| O | 2.247716 | -0.715661 | -0.812052 |
| O | 3.310672 | -0.530660 | 0.095692  |
| O | 0.138403 | 1.227930  | -4.293892 |
| H | 3.138804 | 0.382103  | 0.371176  |
| H | 1.807457 | -0.615158 | -2.740329 |

---

TS7-H<sub>2</sub>O

---

|   |           |           |           |
|---|-----------|-----------|-----------|
| C | -1.939310 | -1.672954 | -0.565173 |
| C | -2.401642 | -0.429740 | -0.165970 |
| C | -1.839648 | 0.890089  | 0.001808  |
| C | 0.881225  | -1.076211 | 0.569991  |
| C | 0.598660  | -1.685375 | -0.641093 |
| C | -0.672955 | -2.147186 | -0.966654 |
| H | -2.747881 | -2.368036 | -0.781689 |
| H | -3.485104 | -0.344086 | -0.144029 |
| H | 1.438675  | -1.872669 | -1.297269 |
| H | -0.708762 | -2.949411 | -1.702583 |
| O | -0.562029 | 0.944644  | 0.511174  |
| C | -0.017853 | 2.165332  | 0.699916  |
| H | 0.700153  | 2.178216  | 1.512435  |
| H | 1.223300  | 2.075375  | -0.757330 |
| H | -0.649963 | 3.014869  | 0.472936  |
| O | 1.978809  | -0.375991 | 0.848468  |
| O | 2.877990  | -0.337509 | -0.244557 |
| O | -2.445045 | 1.926042  | -0.221217 |
| H | 2.596211  | 0.516226  | -0.708017 |
| O | 1.940440  | 1.775363  | -1.382691 |
| H | 2.475974  | 2.551282  | -1.580524 |
| H | 0.317202  | -1.204701 | 1.353228  |

---

IM7-H<sub>2</sub>O

---

|   |           |           |           |
|---|-----------|-----------|-----------|
| C | -2.451532 | 0.961031  | -1.299275 |
| C | -2.589412 | 1.182434  | 0.142897  |
| C | -1.697243 | 1.361120  | 1.101779  |
| C | 0.140983  | -1.109704 | -1.197215 |
| C | -0.071571 | 0.100264  | -1.720708 |
| C | -1.432686 | 0.557446  | -2.075861 |
| H | -3.375170 | 1.197595  | -1.822599 |
| H | -3.595545 | 1.311994  | 0.534199  |
| H | 0.779066  | 0.685828  | -2.057595 |
| H | -1.641967 | 0.569824  | -3.145608 |
| O | 1.335572  | -1.715634 | -0.946263 |
| O | 2.419244  | -0.927946 | -1.411718 |
| O | -1.015085 | 1.595012  | 2.018422  |
| H | 2.729408  | -0.527255 | -0.575798 |
| H | -0.654890 | -1.781430 | -0.890532 |

---

## IM8-2

---

|   |           |           |           |
|---|-----------|-----------|-----------|
| C | 0.592675  | -1.997377 | 0.594901  |
| C | -0.560070 | -1.441079 | 0.966132  |
| C | -1.250892 | -0.373989 | 0.182473  |
| C | 1.692997  | 0.816851  | -0.120481 |
| C | 1.819502  | -0.419581 | -0.938274 |
| C | 1.358764  | -1.633038 | -0.611726 |
| H | 0.991231  | -2.814932 | 1.192665  |
| H | -1.068543 | -1.750401 | 1.874184  |
| H | 2.286746  | -0.257418 | -1.904293 |
| H | 1.542512  | -2.445094 | -1.314158 |
| O | -1.118740 | 0.840133  | 0.762781  |
| C | -1.667325 | 1.952000  | 0.039320  |
| H | -2.686694 | 1.730818  | -0.282374 |
| H | -1.664039 | 2.782538  | 0.743412  |
| H | -1.030829 | 2.183719  | -0.816561 |
| O | 1.479967  | 1.923073  | -0.681250 |
| O | -2.475890 | -0.701539 | -0.384697 |
| O | -1.252971 | -0.457204 | -1.196768 |
| H | 1.783153  | 0.765465  | 0.944475  |

---

## IM8-2-1

---

|   |           |           |           |
|---|-----------|-----------|-----------|
| C | 0.746144  | -2.038839 | 0.483851  |
| C | -0.358315 | -1.316415 | 0.651638  |
| C | -0.749791 | -0.131065 | -0.212825 |
| C | 2.393588  | 0.540826  | 0.143228  |
| C | 2.468235  | -0.670146 | -0.722485 |
| C | 1.760653  | -1.797711 | -0.558778 |
| H | 0.914972  | -2.886799 | 1.145013  |
| H | -1.047615 | -1.517442 | 1.465622  |
| H | 3.115995  | -0.552796 | -1.585460 |
| H | 1.924264  | -2.606927 | -1.268968 |
| O | -0.532251 | 1.012581  | 0.529960  |
| C | -0.707221 | 2.240407  | -0.184991 |
| H | -1.713377 | 2.302010  | -0.610863 |
| H | -0.569510 | 3.030180  | 0.552062  |
| H | 0.048517  | 2.329912  | -0.968690 |
| O | 2.466635  | 1.687165  | -0.370720 |
| O | -2.137643 | -0.215305 | -0.616487 |
| O | -0.127201 | -0.139912 | -1.438934 |
| N | -2.984633 | -0.201778 | 0.497927  |
| O | -4.102486 | -0.182823 | 0.152213  |
| H | 2.277889  | 0.435463  | 1.201723  |

---

## P4

---

|   |           |           |           |
|---|-----------|-----------|-----------|
| C | 2.368406  | -1.102293 | -0.706958 |
| C | 2.523100  | 0.229833  | -0.673398 |
| C | 1.848655  | 1.214975  | 0.204847  |
| C | -1.765416 | -0.400198 | -0.013536 |
| C | 0.125832  | -1.727922 | 0.206020  |
| C | 1.425793  | -1.958568 | 0.017975  |
| H | 3.024836  | -1.641726 | -1.389365 |
| H | 3.221995  | 0.699171  | -1.358048 |
| H | -0.554086 | -2.416720 | 0.693419  |
| H | 1.789069  | -2.926440 | 0.349056  |
| O | -2.115982 | 0.774796  | -0.515802 |
| O | -0.450309 | -0.570929 | -0.253300 |
| O | -2.485006 | -1.178848 | 0.557881  |
| O | 1.770407  | 2.391525  | -0.066500 |
| C | -3.499622 | 1.105352  | -0.352745 |
| H | -3.615756 | 2.086853  | -0.806970 |
| H | -4.124016 | 0.366709  | -0.858838 |
| H | -3.757263 | 1.134489  | 0.707466  |
| H | 1.482582  | 0.819184  | 1.129098  |

---

## TS8-2

---

|   |           |           |           |
|---|-----------|-----------|-----------|
| C | 0.878541  | -1.688271 | 0.891865  |
| C | -0.298198 | -1.142509 | 1.217169  |
| C | -1.067817 | -0.272771 | 0.304988  |
| C | 1.560721  | 0.978127  | -0.316472 |
| C | 1.854815  | -0.334772 | -0.957461 |
| C | 1.555898  | -1.513163 | -0.403453 |
| H | 1.361320  | -2.334690 | 1.621269  |
| H | -0.727689 | -1.274190 | 2.204464  |
| H | 2.253206  | -0.273681 | -1.964964 |
| H | 1.792764  | -2.423316 | -0.950498 |
| O | -1.506524 | 0.820700  | 0.855538  |
| C | -2.229323 | 1.744724  | 0.006113  |
| H | -3.020294 | 1.206661  | -0.515964 |
| H | -2.631439 | 2.491513  | 0.685976  |
| H | -1.527393 | 2.185792  | -0.702504 |
| O | 0.900671  | 1.850509  | -0.836309 |
| O | -1.852011 | -1.837464 | -0.746208 |
| O | -1.255736 | -0.474433 | -0.935265 |
| H | 1.955926  | 1.078730  | 0.567713  |

---

TS8-2-1-NO<sub>2</sub>

|   |           |           |           |
|---|-----------|-----------|-----------|
| C | 1.117000  | -1.887644 | 0.788948  |
| C | 0.038579  | -1.117006 | 0.922351  |
| C | -0.345124 | 0.066785  | 0.049992  |
| C | 2.873497  | 0.586663  | 0.418039  |
| C | 2.967407  | -0.656900 | -0.382540 |
| C | 2.201387  | -1.747184 | -0.197525 |
| H | 1.202863  | -2.738145 | 1.464382  |
| H | -0.679280 | -1.288418 | 1.719325  |
| H | 3.736478  | -0.651122 | -1.150869 |
| H | 2.413996  | -2.634905 | -0.791582 |
| O | -0.409071 | 1.165823  | 0.884416  |
| C | -0.550168 | 2.420383  | 0.211837  |
| H | -1.419854 | 2.408534  | -0.452514 |
| H | -0.694307 | 3.161787  | 0.995896  |
| H | 0.355033  | 2.649741  | -0.356793 |
| O | 3.545461  | 1.562430  | 0.163120  |
| O | -2.135575 | -0.237553 | -0.435874 |
| O | -0.285140 | 0.081768  | -1.314197 |
| N | -3.378937 | -0.445507 | -0.374398 |
| O | -4.092106 | -0.494468 | -1.301413 |
| H | 2.173301  | 0.585679  | 1.272753  |

## TS8-3

|   |           |           |           |
|---|-----------|-----------|-----------|
| C | 0.113548  | 2.098070  | 0.056293  |
| C | -0.960023 | 1.322959  | 0.308721  |
| C | -1.127307 | -0.122712 | 0.508470  |
| C | 1.348180  | -0.647190 | -0.463516 |
| C | 2.097807  | 0.636727  | -0.470830 |
| C | 1.512243  | 1.823057  | -0.255813 |
| H | -0.119015 | 3.161964  | 0.049946  |
| H | -1.913249 | 1.835574  | 0.422130  |
| H | 3.163145  | 0.577417  | -0.673439 |
| H | 2.135330  | 2.710163  | -0.325111 |
| O | -2.263985 | -0.690154 | 0.178334  |
| C | -2.933329 | -0.192147 | -0.989053 |
| H | -2.197532 | 0.002502  | -1.771990 |
| H | -3.609878 | -0.989495 | -1.290403 |
| H | -3.504975 | 0.707888  | -0.751494 |
| O | 0.217760  | -0.718910 | -1.011766 |
| O | 0.844835  | -0.368679 | 1.435914  |
| O | -0.461614 | -0.832229 | 1.349417  |
| H | 1.769862  | -1.510228 | 0.007917  |

## TS8-1

|   |           |           |           |
|---|-----------|-----------|-----------|
| C | -0.159986 | -1.247582 | 1.481675  |
| C | 0.092561  | 0.043374  | 1.707158  |
| C | 0.240136  | 1.022771  | 0.609196  |
| C | 1.930813  | -1.099393 | -0.709544 |
| C | 0.605623  | -1.761416 | -0.834483 |
| C | -0.311637 | -1.827272 | 0.136364  |
| H | -0.258625 | -1.917963 | 2.333109  |
| H | 0.278419  | 0.425899  | 2.705380  |
| H | 0.370467  | -2.104623 | -1.836286 |
| H | -1.266969 | -2.301582 | -0.074207 |
| O | 1.345940  | 1.739709  | 0.701788  |
| C | 1.602347  | 2.667020  | -0.371267 |
| H | 0.774984  | 3.372919  | -0.457344 |
| H | 2.523741  | 3.173519  | -0.093215 |
| H | 1.725539  | 2.108613  | -1.301341 |
| O | 2.328487  | -0.312988 | -1.607872 |
| O | -0.544530 | 1.218299  | -0.324327 |
| O | -1.955056 | 0.360670  | -0.257041 |
| N | -3.690205 | -0.442750 | -0.245054 |
| O | -4.554806 | 0.257783  | -0.495907 |
| H | 2.546492  | -1.291566 | 0.144217  |

## TS8-2-2

|   |           |           |           |
|---|-----------|-----------|-----------|
| C | 0.813318  | 0.743026  | 1.569078  |
| C | 1.590525  | -0.274240 | 1.171575  |
| C | 2.128158  | -0.525538 | -0.195028 |
| C | -1.488254 | 0.255848  | -0.419471 |
| C | -0.751649 | 1.593564  | -0.210811 |
| C | 0.208470  | 1.774882  | 0.728910  |
| H | 0.628267  | 0.851544  | 2.638217  |
| H | 1.926602  | -1.007098 | 1.898219  |
| H | -1.031002 | 2.363444  | -0.923380 |
| H | 0.510790  | 2.802399  | 0.938940  |
| O | -1.760806 | -0.307559 | 0.812804  |
| O | -0.560614 | -0.228866 | -1.131237 |
| O | -2.463284 | 0.211199  | -1.318875 |
| O | 2.489383  | -1.684729 | -0.525729 |
| C | -2.198265 | -1.664360 | 0.721527  |
| H | -2.289260 | -2.016972 | 1.748476  |
| H | -3.162096 | -1.728738 | 0.213359  |
| H | -1.452933 | -2.262845 | 0.186401  |
| H | 2.311077  | 0.298730  | -0.886428 |

## P4

---

|   |           |           |           |
|---|-----------|-----------|-----------|
| C | -0.456754 | 2.046891  | -0.048852 |
| C | -1.465171 | 1.275437  | -0.485307 |
| C | -1.741767 | -0.164022 | -0.231441 |
| C | 1.618793  | 0.765341  | 0.605510  |
| C | 0.719405  | 1.738292  | 0.782570  |
| H | -0.527704 | 3.100940  | -0.319067 |
| H | 2.450905  | 0.678118  | 1.272504  |
| H | 0.895977  | 2.450500  | 1.586986  |
| O | -0.884396 | -0.753095 | 0.610585  |
| C | -1.104835 | -2.149690 | 0.842829  |
| H | -1.060474 | -2.696779 | -0.100927 |
| H | -0.299770 | -2.462777 | 1.505092  |
| H | -2.080820 | -2.302591 | 1.307468  |
| O | -2.672756 | -0.739203 | -0.748253 |
| H | -2.239150 | 1.727624  | -1.097437 |
| O | 1.468850  | -0.158918 | -0.475306 |
| C | 2.533401  | -1.021136 | -0.489870 |
| O | 2.345487  | -2.206163 | -0.509888 |
| H | 3.532394  | -0.637899 | -0.483397 |

---

## IM9-2

---

|   |           |           |           |
|---|-----------|-----------|-----------|
| C | 0.806416  | -1.840897 | 0.311653  |
| C | 1.578107  | -0.835190 | -0.140059 |
| C | 1.382547  | 0.646178  | 0.005342  |
| C | -1.741706 | -0.341512 | -0.546555 |
| C | -1.613838 | -1.193358 | 0.651582  |
| C | -0.489827 | -1.832407 | 0.999726  |
| H | 1.251022  | -2.826135 | 0.176856  |
| H | -2.517349 | -1.289088 | 1.247248  |
| H | -0.538712 | -2.492395 | 1.864496  |
| O | 0.297444  | 1.011267  | 0.666246  |
| C | 0.074109  | 2.425906  | 0.776240  |
| H | -0.005212 | 2.864550  | -0.219954 |
| H | -0.866209 | 2.523864  | 1.314411  |
| H | 0.897148  | 2.890096  | 1.322122  |
| O | -2.265173 | 0.937631  | -0.376740 |
| O | -3.026361 | -0.133139 | -1.037659 |
| O | 2.200470  | 1.416198  | -0.456913 |
| H | -0.964323 | -0.425361 | -1.307477 |
| H | 2.499245  | -1.063464 | -0.634322 |

---

## IM9-2-1

---

|   |           |           |           |
|---|-----------|-----------|-----------|
| C | -0.387146 | 2.133587  | -0.074669 |
| C | -1.395563 | 1.362133  | -0.511124 |
| C | -1.672159 | -0.077326 | -0.257258 |
| C | 1.637114  | -0.143038 | -0.511840 |
| C | 1.688401  | 0.852037  | 0.579693  |
| C | 0.789013  | 1.824988  | 0.756753  |
| H | -0.458096 | 3.187636  | -0.344884 |
| H | 2.538351  | 0.751353  | 1.249139  |
| H | 0.965585  | 2.537196  | 1.561169  |
| O | -0.814788 | -0.666399 | 0.584768  |
| C | -1.035227 | -2.062994 | 0.817012  |
| H | -0.990866 | -2.610083 | -0.126744 |
| H | -0.230162 | -2.376081 | 1.479275  |
| H | -2.011212 | -2.215895 | 1.281651  |
| O | 1.798920  | -1.476601 | -0.154719 |
| O | 2.844777  | -0.731345 | -0.872590 |
| O | -2.603148 | -0.652507 | -0.774070 |
| H | 0.945954  | 0.038550  | -1.335298 |
| H | -2.169542 | 1.814320  | -1.123254 |
| N | 3.889690  | 0.037104  | -0.401376 |
| O | 4.905530  | -0.457757 | -0.704826 |

---

## IM9-3

---

|   |           |           |           |
|---|-----------|-----------|-----------|
| C | 1.507058  | 1.542254  | 0.022983  |
| C | 0.164395  | 1.492932  | 0.030462  |
| C | -0.562463 | 0.157970  | -0.024707 |
| C | 0.824650  | -1.530684 | -0.456039 |
| C | 2.166356  | -0.914288 | -0.186708 |
| C | 2.411752  | 0.396231  | -0.001823 |
| H | 1.957644  | 2.528183  | 0.069870  |
| H | 2.993307  | -1.615031 | -0.123719 |
| H | 3.452695  | 0.659527  | 0.173281  |
| O | -1.904116 | 0.398008  | -0.164623 |
| C | -2.735466 | -0.766012 | -0.147812 |
| H | -2.484852 | -1.415544 | -0.988985 |
| H | -2.607720 | -1.300852 | 0.796085  |
| H | -3.756718 | -0.401081 | -0.242555 |
| O | 0.128514  | -1.877381 | 0.732022  |
| O | -0.248358 | -0.563222 | 1.174027  |
| O | -0.078816 | -0.639724 | -1.066894 |
| H | 0.880008  | -2.438128 | -1.061422 |
| H | -0.438249 | 2.376611  | 0.059298  |

---



## TS9-2

|   |           |           |           |
|---|-----------|-----------|-----------|
| C | 0.677114  | -1.848952 | 0.296442  |
| C | 1.562656  | -0.942425 | -0.164271 |
| C | 1.563825  | 0.555283  | -0.014667 |
| C | -1.675435 | -0.126104 | -0.494723 |
| C | -1.658976 | -0.925923 | 0.704027  |
| C | -0.585859 | -1.686211 | 1.014130  |
| H | 1.014392  | -2.878672 | 0.183392  |
| H | -2.535484 | -0.902723 | 1.336664  |
| H | -0.671595 | -2.317776 | 1.897625  |
| O | 0.490150  | 1.075119  | 0.558562  |
| C | 0.480781  | 2.506315  | 0.697083  |
| H | 0.583527  | 2.972604  | -0.284000 |
| H | -0.483428 | 2.742569  | 1.141687  |
| H | 1.302650  | 2.820101  | 1.342378  |
| O | -2.497347 | 0.822280  | -0.754187 |
| O | -3.663577 | -0.063375 | -0.583546 |
| O | 2.516758  | 1.199258  | -0.400820 |
| H | -0.860373 | -0.263889 | -1.214116 |
| H | 2.450234  | -1.287823 | -0.651924 |

TS9-2-1-NO<sub>2</sub>

|   |           |           |           |
|---|-----------|-----------|-----------|
| C | -0.768495 | 2.015734  | -0.146936 |
| C | -1.776912 | 1.244280  | -0.583391 |
| C | -2.053508 | -0.195179 | -0.329525 |
| C | 1.255765  | -0.260891 | -0.584107 |
| C | 1.307052  | 0.734184  | 0.507426  |
| C | 0.407664  | 1.707135  | 0.684486  |
| H | -0.839445 | 3.069783  | -0.417151 |
| H | 2.157002  | 0.633500  | 1.176872  |
| H | 0.584236  | 2.419343  | 1.488902  |
| O | -1.196137 | -0.784252 | 0.512501  |
| C | -1.416576 | -2.180847 | 0.744745  |
| H | -1.372215 | -2.727936 | -0.199011 |
| H | -0.611511 | -2.493934 | 1.407008  |
| H | -2.392561 | -2.333748 | 1.209384  |
| O | 1.417571  | -1.594454 | -0.226986 |
| O | 3.048188  | -0.744350 | -0.880565 |
| O | -2.984497 | -0.770360 | -0.846337 |
| H | 0.564605  | -0.079303 | -1.407565 |
| H | -2.550891 | 1.696467  | -1.195521 |
| N | 4.009811  | -0.037154 | -0.446912 |
| O | 5.025651  | -0.532016 | -0.750361 |

## TS9-3

---

|   |           |           |           |
|---|-----------|-----------|-----------|
| C | -1.382972 | -1.615386 | 0.179950  |
| C | 0.645612  | 0.068154  | 0.192276  |
| C | 0.083076  | 1.469304  | -0.020601 |
| C | -1.255877 | 1.726257  | -0.069838 |
| C | -2.302119 | 0.777306  | 0.073764  |
| C | -2.358155 | -0.586363 | 0.254990  |
| H | -1.588307 | -2.547474 | 0.704599  |
| H | -3.283132 | 1.246818  | 0.137537  |
| H | -3.311554 | -0.971206 | 0.607054  |
| O | 0.241515  | -0.592566 | 1.197235  |
| O | 0.029491  | -0.603438 | -1.171114 |
| O | -0.460845 | -1.820321 | -0.714644 |
| O | 2.012962  | 0.149786  | -0.058737 |
| C | 2.725759  | -1.054351 | 0.205142  |
| H | 2.619457  | -1.336158 | 1.254359  |
| H | 2.346491  | -1.856610 | -0.435409 |
| H | 3.767939  | -0.848067 | -0.036151 |
| H | -1.543258 | 2.768210  | -0.159782 |
| H | 0.766507  | 2.284460  | -0.136107 |

---

## TS9-1

---

|   |           |           |           |
|---|-----------|-----------|-----------|
| C | 2.205965  | 1.896208  | -0.226324 |
| C | 2.926847  | 0.800685  | 0.101554  |
| C | 2.609676  | -0.650858 | 0.003620  |
| C | -0.375248 | 0.752289  | 0.961441  |
| C | -0.312568 | 1.534360  | -0.248378 |
| C | 0.839020  | 2.061099  | -0.725324 |
| H | 2.757544  | 2.836858  | -0.183059 |
| H | -1.262321 | 1.698321  | -0.746117 |
| H | 0.756941  | 2.744175  | -1.570904 |
| O | 1.334330  | -0.928010 | -0.320024 |
| C | 0.982608  | -2.325177 | -0.454451 |
| H | 1.226566  | -2.863094 | 0.463666  |
| H | -0.090882 | -2.328144 | -0.637317 |
| H | 1.527805  | -2.766108 | -1.291816 |
| O | -1.357680 | 0.061214  | 1.308549  |
| O | -2.488471 | -0.104176 | 0.175271  |
| O | 3.459896  | -1.500589 | 0.198745  |
| N | -4.174761 | -0.683646 | -0.557684 |
| O | -5.117406 | -0.113526 | -0.200185 |
| H | 0.449923  | 0.781532  | 1.679798  |
| H | 3.954586  | 0.951052  | 0.417863  |

---

## IM10-2

---

|   |           |           |           |
|---|-----------|-----------|-----------|
| C | 2.507417  | -0.078196 | 0.238366  |
| C | 2.210970  | -0.439705 | -1.157422 |
| C | -0.971693 | -0.329386 | -0.138411 |
| C | -0.576097 | 1.098139  | 0.166702  |
| C | 0.581396  | 1.523378  | 0.704978  |
| C | 1.814535  | 0.803570  | 0.990956  |
| H | 3.454238  | -0.447530 | 0.623812  |
| H | 3.069741  | -0.867338 | -1.711523 |
| H | 0.574021  | 2.569576  | 1.005103  |
| H | 2.288219  | 1.105631  | 1.925923  |
| O | -0.251566 | -1.330839 | 0.402937  |
| C | -0.470939 | -1.520880 | 1.800350  |
| H | -0.154893 | -0.641365 | 2.370888  |
| H | -1.526805 | -1.737376 | 1.990456  |
| H | 0.136840  | -2.379231 | 2.080995  |
| O | -1.490952 | -0.565498 | -1.381130 |
| O | -2.361267 | -0.516757 | -0.180827 |
| O | 1.154874  | -0.263979 | -1.730106 |
| H | -1.355400 | 1.808942  | -0.013148 |

---

## IM10-2-1

---

|   |           |           |           |
|---|-----------|-----------|-----------|
| C | -2.732759 | 0.775869  | 0.669458  |
| C | -3.072809 | 0.025466  | -0.561394 |
| C | 0.516713  | -0.189899 | -0.693627 |
| C | 0.155588  | -0.941127 | 0.605406  |
| C | -0.775599 | -0.617487 | 1.512574  |
| C | -1.768060 | 0.458415  | 1.551280  |
| H | -3.407431 | 1.591203  | 0.919618  |
| H | -4.026471 | 0.332232  | -1.035912 |
| H | -0.721024 | -1.221141 | 2.418729  |
| H | -1.763090 | 1.021976  | 2.485616  |
| O | -0.144601 | 0.990810  | -0.919287 |
| C | 0.291074  | 2.138874  | -0.202348 |
| H | 0.384175  | 1.937842  | 0.870382  |
| H | 1.244437  | 2.502686  | -0.597600 |
| H | -0.479804 | 2.892707  | -0.360330 |
| O | 0.235910  | -1.094411 | -1.660841 |
| O | 1.948647  | -0.002030 | -0.760533 |
| O | -2.427768 | -0.884046 | -1.030474 |
| N | 2.515531  | 0.384518  | 0.474222  |
| O | 3.663206  | 0.554585  | 0.346812  |
| H | 0.808076  | -1.765753 | 0.803271  |

---

## P13

---

|   |           |           |           |
|---|-----------|-----------|-----------|
| C | -2.518085 | -0.916078 | 0.633394  |
| C | -2.645726 | 0.415668  | 0.512682  |
| C | -1.955178 | 1.225003  | -0.511103 |
| C | 1.654860  | -0.349798 | -0.039582 |
| C | -0.292933 | -1.590367 | -0.306445 |
| C | -1.596466 | -1.794192 | -0.099973 |
| H | -3.159325 | -1.426323 | 1.351083  |
| H | -3.331500 | 0.964431  | 1.152684  |
| H | 0.364863  | -2.297914 | -0.797913 |
| H | -1.979614 | -2.754967 | -0.430898 |
| O | 2.044347  | 0.813248  | 0.454733  |
| O | 0.317494  | -0.442537 | 0.136877  |
| O | 2.352126  | -1.183143 | -0.557868 |
| O | -2.013995 | 2.435743  | -0.536101 |
| C | 3.447315  | 1.077002  | 0.330764  |
| H | 3.595001  | 2.056092  | 0.780576  |
| H | 4.020252  | 0.313915  | 0.860500  |
| H | 3.734951  | 1.085575  | -0.721946 |
| H | -1.407131 | 0.669277  | -1.293634 |

---

## TS10-2

---

|   |           |           |           |
|---|-----------|-----------|-----------|
| C | 2.538202  | -0.380496 | 0.145820  |
| C | 2.144578  | -0.665878 | -1.243999 |
| C | -0.845346 | -0.147829 | -0.194214 |
| C | -0.308044 | 1.202456  | 0.138485  |
| C | 0.887182  | 1.469712  | 0.706296  |
| C | 2.011346  | 0.578275  | 0.940383  |
| H | 3.446190  | -0.875594 | 0.479807  |
| H | 2.950969  | -1.096037 | -1.867350 |
| H | 1.016365  | 2.496618  | 1.041981  |
| H | 2.561265  | 0.795714  | 1.855976  |
| O | -0.441104 | -1.224152 | 0.408706  |
| C | -0.536481 | -1.352558 | 1.837235  |
| H | -0.251681 | -0.421748 | 2.332319  |
| H | -1.571654 | -1.617451 | 2.059382  |
| H | 0.147795  | -2.154189 | 2.107309  |
| O | -1.769927 | -0.171938 | -1.060389 |
| O | -2.866931 | -0.762705 | -0.222366 |
| O | 1.062631  | -0.432040 | -1.746188 |
| H | -0.930083 | 2.041045  | -0.095474 |

---

TS10-2-1-NO<sub>2</sub>

---

|   |           |           |           |
|---|-----------|-----------|-----------|
| C | 3.340073  | -0.833627 | 0.059973  |
| C | 4.295109  | 0.281099  | 0.261743  |
| C | -0.981432 | -0.521510 | -0.580223 |
| C | -0.011088 | 0.655124  | -0.622038 |
| C | 1.322828  | 0.531233  | -0.458543 |
| C | 2.028833  | -0.725984 | -0.242810 |
| H | 3.768488  | -1.828092 | 0.155973  |
| H | 5.351024  | -0.030587 | 0.377096  |
| H | 1.922486  | 1.435425  | -0.489489 |
| H | 1.452843  | -1.638477 | -0.366951 |
| O | -0.740333 | -1.484703 | 0.383685  |
| C | -0.905189 | -1.084325 | 1.737890  |
| H | -0.348910 | -0.164333 | 1.951222  |
| H | -1.963056 | -0.942142 | 1.979682  |
| H | -0.505809 | -1.901151 | 2.338489  |
| O | -0.742460 | -1.004638 | -1.802478 |
| O | -2.724168 | 0.029114  | -0.487553 |
| O | 4.005547  | 1.458789  | 0.307367  |
| N | -2.910573 | 1.092618  | 0.386498  |
| O | -4.046142 | 1.379383  | 0.449211  |
| H | -0.445410 | 1.611643  | -0.889773 |

---

## TS10-1

|   |           |           |           |
|---|-----------|-----------|-----------|
| C | -2.857179 | 0.821634  | 0.373990  |
| C | -3.030931 | -0.263341 | -0.609167 |
| C | 0.362462  | -0.327688 | -0.574822 |
| C | 0.034592  | -0.661954 | 0.876921  |
| C | -0.885230 | -0.101904 | 1.680854  |
| C | -1.954197 | 0.840747  | 1.377110  |
| H | -3.630048 | 1.586414  | 0.362902  |
| H | -4.021942 | -0.271468 | -1.105975 |
| H | -0.803325 | -0.390142 | 2.727825  |
| H | -2.095119 | 1.613077  | 2.134476  |
| O | -0.247175 | 0.777643  | -1.093976 |
| C | 0.279038  | 2.027413  | -0.677583 |
| H | 0.349753  | 2.093186  | 0.414689  |
| H | 1.264009  | 2.197701  | -1.126695 |
| H | -0.418162 | 2.782559  | -1.039642 |
| O | 0.421505  | -1.386577 | -1.414433 |
| O | 1.741048  | -0.424074 | -0.811144 |
| O | -2.226583 | -1.135762 | -0.862305 |
| N | 2.870373  | 0.705292  | 0.402140  |
| O | 3.944282  | 0.414526  | 0.206067  |
| H | 0.707996  | -1.380516 | 1.295366  |

## TS10-3

|   |           |           |           |
|---|-----------|-----------|-----------|
| C | -2.490426 | 0.084531  | -0.549511 |
| C | -1.672754 | -1.153481 | -0.497161 |
| C | 0.807248  | -0.333556 | 0.480804  |
| C | 0.509351  | 1.091267  | 0.212217  |
| C | -0.629758 | 1.737983  | -0.109326 |
| C | -1.988631 | 1.322682  | -0.415284 |
| H | -3.559358 | -0.038164 | -0.709768 |
| H | -2.195423 | -2.075868 | -0.206007 |
| H | -0.465251 | 2.812226  | -0.172607 |
| H | -2.679136 | 2.154871  | -0.523236 |
| O | 2.004453  | -0.800790 | 0.194266  |
| C | 2.460033  | -0.597817 | -1.166469 |
| H | 2.622341  | 0.463718  | -1.356631 |
| H | 3.395116  | -1.149799 | -1.229299 |
| H | 1.710631  | -1.012239 | -1.841619 |
| O | 0.171118  | -1.078375 | 1.300348  |
| O | -1.140836 | -0.711101 | 1.464201  |
| O | -0.568270 | -1.228719 | -1.060811 |
| H | 1.395506  | 1.689435  | 0.254933  |

## TS10-1

---

|   |           |           |           |
|---|-----------|-----------|-----------|
| C | -2.557237 | -0.392496 | -0.362206 |
| C | -1.969328 | -1.050348 | 0.823947  |
| C | 0.743311  | 0.834117  | -0.079214 |
| C | -0.211177 | 1.903412  | 0.205507  |
| C | -1.510189 | 1.912058  | -0.128693 |
| C | -2.344083 | 0.877263  | -0.753165 |
| H | -3.310612 | -0.972425 | -0.889594 |
| H | -2.550354 | -1.911059 | 1.208406  |
| H | -2.043496 | 2.844651  | 0.054147  |
| H | -2.959427 | 1.243781  | -1.574982 |
| O | 0.441796  | -0.054703 | -0.978235 |
| C | 0.934415  | -1.417607 | -0.904598 |
| H | 1.859589  | -1.496979 | -1.467903 |
| H | 1.098659  | -1.699900 | 0.132630  |
| H | 0.127980  | -2.003951 | -1.350162 |
| O | 1.853788  | 0.930101  | 0.511842  |
| O | 3.062201  | -0.098254 | 0.059375  |
| O | -0.945867 | -0.715593 | 1.383322  |
| H | 0.225905  | 2.768106  | 0.693118  |
| N | 4.431732  | -1.263720 | -0.453434 |
| O | 4.719940  | -1.057974 | -1.537041 |

---

## IM11-1

---

|   |           |           |           |
|---|-----------|-----------|-----------|
| C | -2.119616 | 0.008574  | -0.394565 |
| C | 0.688098  | -1.569645 | 0.227900  |
| C | 1.255609  | -0.268396 | -0.138435 |
| C | 0.769528  | 0.973674  | 0.131723  |
| C | -0.436979 | 1.347552  | 0.885282  |
| C | -1.685273 | 0.919924  | 0.688118  |
| H | -1.380092 | -0.314191 | -1.125708 |
| H | 1.360282  | -2.415196 | -0.022112 |
| H | -0.248242 | 2.102553  | 1.645347  |
| H | -2.494766 | 1.283460  | 1.315498  |
| O | 2.465105  | -0.310980 | -0.819216 |
| C | 3.584758  | -0.580786 | 0.027656  |
| H | 3.484176  | -1.558984 | 0.509133  |
| H | 4.467434  | -0.581078 | -0.612089 |
| H | 3.679741  | 0.191344  | 0.800407  |
| O | -0.394998 | -1.769075 | 0.739438  |
| O | -3.390247 | 0.262980  | -0.903976 |
| O | -3.097692 | -0.915548 | -0.072458 |
| H | 1.339404  | 1.831499  | -0.158584 |

---

## IM11-1-1

|   |           |           |           |
|---|-----------|-----------|-----------|
| C | 1.678370  | 0.637299  | 0.179893  |
| C | -1.495564 | 1.343809  | -0.879746 |
| C | -1.706368 | 0.025977  | -0.271492 |
| C | -1.147813 | -0.474647 | 0.863421  |
| C | -0.204597 | 0.164458  | 1.796790  |
| C | 1.008928  | 0.645753  | 1.534890  |
| H | 0.953577  | 0.450746  | -0.628299 |
| H | -2.127275 | 1.513380  | -1.775060 |
| H | -0.538760 | 0.132508  | 2.831876  |
| H | 1.618474  | 1.039861  | 2.342519  |
| O | -2.596058 | -0.811879 | -0.927537 |
| C | -3.966616 | -0.449075 | -0.742684 |
| H | -4.165219 | 0.549125  | -1.146217 |
| H | -4.559051 | -1.184199 | -1.287713 |
| H | -4.229952 | -0.466469 | 0.321397  |
| O | -0.716127 | 2.191567  | -0.496485 |
| O | 2.627349  | -0.442894 | 0.208153  |
| O | 2.253620  | 1.829750  | -0.058024 |
| N | 2.875405  | -0.886115 | -1.087105 |
| O | 3.705136  | -1.713199 | -1.095251 |
| H | -1.444376 | -1.442625 | 1.209786  |

## IM11-2-2

|   |           |           |           |
|---|-----------|-----------|-----------|
| C | 1.696818  | -1.555621 | -0.495793 |
| C | 2.549057  | -0.505339 | -0.463393 |
| C | 2.428244  | 0.706055  | 0.356985  |
| C | -0.841424 | 1.535265  | 0.005530  |
| C | -0.608859 | -0.793869 | 0.063703  |
| C | 0.373094  | -1.710475 | 0.076428  |
| H | 2.063947  | -2.448216 | -1.002921 |
| O | -0.913211 | 2.558009  | -0.599686 |
| O | -0.521785 | 0.363721  | -0.645404 |
| O | 1.474424  | 1.019896  | 1.046206  |
| H | -1.027270 | 1.400620  | 1.078445  |
| H | 3.331567  | 1.345889  | 0.360467  |
| H | 0.096482  | -2.685415 | 0.463427  |
| H | -1.494556 | -0.981755 | 0.633913  |
| O | 3.793778  | -0.636147 | -1.155100 |
| C | 4.872391  | -0.461689 | -0.232572 |
| H | 5.748336  | -0.944659 | -0.612522 |
| H | 5.067645  | 0.582642  | -0.105490 |
| H | 4.608267  | -0.892510 | 0.710578  |



## P12

|   |           |           |           |
|---|-----------|-----------|-----------|
| C | 2.650568  | -0.752032 | -0.480007 |
| C | -0.481822 | -1.236603 | 0.594596  |
| C | -0.726867 | 0.095073  | 0.025800  |
| C | 0.155887  | 1.122957  | 0.111756  |
| C | 1.482270  | 1.132986  | 0.737167  |
| C | 2.534710  | 0.319333  | 0.538062  |
| H | 3.691968  | -0.969043 | -0.787619 |
| H | 0.438848  | -1.326827 | 1.194326  |
| H | 1.624687  | 1.993290  | 1.390616  |
| H | 3.454954  | 0.546922  | 1.070366  |
| O | -1.895216 | 0.384486  | -0.622761 |
| C | -3.116947 | -0.009850 | 0.014651  |
| H | -3.102545 | 0.279472  | 1.071194  |
| H | -3.907147 | 0.533358  | -0.503743 |
| H | -3.265529 | -1.085182 | -0.075055 |
| O | -1.247641 | -2.168482 | 0.461875  |
| O | 1.729134  | -1.350611 | -0.988997 |
| H | -0.118248 | 2.093787  | -0.244949 |

TS11-2-2-NO<sub>2</sub>

|   |           |           |           |
|---|-----------|-----------|-----------|
| C | 0.000000  | 0.000000  | 0.000000  |
| C | 0.000000  | 0.000000  | 3.325461  |
| C | 1.449029  | 0.000000  | 3.099030  |
| C | 2.145069  | 0.640335  | 2.122487  |
| C | 1.645646  | 1.548663  | 1.076584  |
| C | 0.716625  | 1.312688  | 0.152558  |
| H | 0.350874  | -0.798738 | 0.715857  |
| H | -0.291416 | -0.520265 | 4.259467  |
| H | 2.180830  | 2.495700  | 1.037567  |
| H | 0.446660  | 2.057384  | -0.588404 |
| O | 2.201098  | -0.748963 | 3.988836  |
| C | 2.401381  | -0.106829 | 5.250987  |
| H | 1.445123  | 0.081791  | 5.749918  |
| H | 2.997509  | -0.790087 | 5.855986  |
| H | 2.932649  | 0.843229  | 5.120041  |
| O | -0.839485 | 0.484642  | 2.594199  |
| O | 1.123822  | -0.705704 | -1.301146 |
| O | -1.155340 | -0.029613 | -0.411625 |
| N | 1.755427  | -1.528357 | -0.579505 |
| O | 2.612079  | -2.219322 | -1.037948 |
| H | 3.199658  | 0.459660  | 2.112496  |

## TS11-2

---

|   |           |           |           |
|---|-----------|-----------|-----------|
| C | 2.025757  | 0.284624  | -0.328917 |
| C | -0.934752 | 1.608034  | 0.217690  |
| C | -1.340455 | 0.249080  | -0.150840 |
| C | -0.720276 | -0.929965 | 0.135235  |
| C | 0.495202  | -1.155948 | 0.931597  |
| C | 1.717191  | -0.627440 | 0.755392  |
| H | 1.227824  | 0.620238  | -0.995290 |
| H | -1.720195 | 2.361164  | 0.010010  |
| H | 0.351696  | -1.892446 | 1.719298  |
| H | 2.539240  | -0.890437 | 1.408678  |
| O | -2.540548 | 0.148396  | -0.839120 |
| C | -3.693982 | 0.284091  | -0.003890 |
| H | -3.716251 | 1.267549  | 0.476689  |
| H | -4.562582 | 0.179098  | -0.654116 |
| H | -3.704533 | -0.493931 | 0.768704  |
| O | 0.134786  | 1.946003  | 0.687113  |
| O | 3.829083  | -0.508415 | -0.526805 |
| O | 3.179500  | 0.804916  | -0.509484 |
| H | -1.186333 | -1.849538 | -0.151254 |

---

## TS11-1

---

|   |           |           |           |
|---|-----------|-----------|-----------|
| C | -1.038789 | 1.111920  | 0.084227  |
| C | 1.062354  | -1.083645 | 1.109413  |
| C | 1.856722  | -0.519006 | 0.008542  |
| C | 1.938603  | 0.774605  | -0.404887 |
| C | 1.274027  | 1.961207  | 0.154115  |
| C | -0.029281 | 2.117020  | 0.419474  |
| H | -0.786983 | 0.225378  | -0.506129 |
| H | 1.298605  | -2.147440 | 1.307670  |
| H | 1.955294  | 2.793763  | 0.318138  |
| H | -0.397954 | 3.041574  | 0.852611  |
| O | 2.665150  | -1.415884 | -0.670509 |
| C | 3.841671  | -1.793041 | 0.051272  |
| H | 3.582299  | -2.307637 | 0.981960  |
| H | 4.397723  | -2.472152 | -0.594988 |
| H | 4.449435  | -0.910891 | 0.284068  |
| O | 0.219734  | -0.504082 | 1.762153  |
| O | -2.209938 | 1.285178  | 0.401788  |
| O | -3.141995 | 0.068339  | -0.198291 |
| N | -4.347662 | -1.269579 | -0.788601 |
| O | -5.413501 | -1.166290 | -0.395959 |
| H | 2.620746  | 1.036374  | -1.186589 |

---

## TS11-2-1

|   |           |           |           |
|---|-----------|-----------|-----------|
| C | 1.481190  | 0.813423  | -0.026809 |
| C | -1.734708 | 1.488417  | -0.385549 |
| C | -1.839851 | 0.034280  | -0.230672 |
| C | -1.117930 | -0.783092 | 0.582085  |
| C | -0.058162 | -0.429064 | 1.539076  |
| C | 1.047318  | 0.277946  | 1.298209  |
| H | 0.803792  | 0.599946  | -0.859941 |
| H | -2.516442 | 1.904053  | -1.053944 |
| H | -0.212587 | -0.862344 | 2.525237  |
| H | 1.760871  | 0.460145  | 2.098687  |
| O | -2.817342 | -0.584202 | -1.000663 |
| C | -4.141400 | -0.404566 | -0.494370 |
| H | -4.411701 | 0.656167  | -0.470050 |
| H | -4.810188 | -0.933082 | -1.174459 |
| H | -4.228294 | -0.819787 | 0.516933  |
| O | -0.904632 | 2.214105  | 0.121861  |
| O | 2.823597  | 0.536157  | -0.307845 |
| O | 2.046258  | 2.058097  | -0.016628 |
| N | 3.146137  | -1.379713 | -0.602461 |
| O | 4.253142  | -1.510423 | -0.798369 |
| H | -1.356108 | -1.825659 | 0.617099  |

## TS11-3

|   |           |           |           |
|---|-----------|-----------|-----------|
| C | 2.434986  | -0.159655 | -0.322064 |
| C | -0.030437 | -1.226254 | -0.124992 |
| C | -0.963432 | -0.078428 | 0.093258  |
| C | -0.594185 | 1.221797  | 0.041807  |
| C | 0.711924  | 1.741938  | -0.283880 |
| C | 1.923164  | 1.172565  | -0.509651 |
| H | 3.302515  | -0.466714 | -0.901881 |
| H | -0.359015 | -2.166848 | 0.344083  |
| H | 0.669544  | 2.816128  | -0.458187 |
| H | 2.674506  | 1.823189  | -0.951173 |
| O | -2.256630 | -0.339624 | 0.450972  |
| C | -2.971027 | -1.201043 | -0.439388 |
| H | -2.470606 | -2.167666 | -0.542582 |
| H | -3.956016 | -1.346038 | 0.002973  |
| H | -3.063527 | -0.731274 | -1.423844 |
| O | 0.722941  | -1.265417 | -1.129846 |
| O | 1.079549  | -0.722857 | 1.309933  |
| O | 2.274914  | -0.930676 | 0.693069  |
| H | -1.311328 | 1.996752  | 0.215159  |

## TS11-2-2

---

|   |           |           |           |
|---|-----------|-----------|-----------|
| C | -0.275776 | -1.352399 | -0.516047 |
| C | 0.902332  | -1.995171 | -0.335841 |
| C | 1.922792  | -1.702246 | 0.675107  |
| C | 1.125002  | 1.395382  | -0.436639 |
| C | -0.018471 | 0.999884  | 0.444668  |
| C | -0.752358 | -0.139680 | 0.189815  |
| H | -0.413821 | 1.809409  | 1.046647  |
| O | 1.726144  | 2.573644  | -0.282695 |
| O | 0.134273  | 1.888076  | -1.244717 |
| O | 1.978460  | -0.714420 | 1.381876  |
| H | 1.739343  | 0.580925  | -0.837109 |
| H | 2.687364  | -2.495276 | 0.777663  |
| H | -1.764906 | -0.149064 | 0.535587  |
| H | -0.935900 | -1.766046 | -1.249554 |
| O | 1.091199  | -3.178932 | -1.115545 |
| C | 2.490561  | -3.424813 | -1.277499 |
| H | 2.895447  | -3.798882 | -0.360416 |
| H | 2.638406  | -4.146679 | -2.053353 |
| H | 2.984907  | -2.512856 | -1.539908 |

---

## IM12-2

---

|   |           |           |           |
|---|-----------|-----------|-----------|
| C | 2.617369  | -0.980232 | -0.575593 |
| C | -0.551115 | -0.993725 | 0.501543  |
| C | -0.550065 | 0.401369  | 0.010058  |
| C | 0.497959  | 1.238165  | 0.183421  |
| C | 1.792240  | 0.960012  | 0.811464  |
| C | 2.688497  | -0.006932 | 0.536784  |
| H | 3.603682  | -1.347959 | -0.918732 |
| H | 0.378583  | -1.323034 | 0.956008  |
| H | 2.079283  | 1.724446  | 1.533243  |
| H | 3.629505  | 0.004973  | 1.080790  |
| O | -1.610344 | 0.935402  | -0.662002 |
| C | -2.951111 | 0.583196  | -0.304093 |
| H | -3.117120 | 0.730232  | 0.766322  |
| H | -3.582544 | 1.260624  | -0.878868 |
| H | -3.163696 | -0.451346 | -0.574419 |
| O | -1.704001 | -1.484348 | 1.118048  |
| O | -1.255530 | -1.949232 | -0.209321 |
| O | 1.604471  | -1.358014 | -1.124924 |
| H | 0.414169  | 2.267261  | -0.097366 |

---

## IM12-2-1

---

|   |           |           |           |
|---|-----------|-----------|-----------|
| C | -2.568573 | -1.453351 | 0.861001  |
| C | 0.704392  | -0.257364 | 0.578573  |
| C | -0.036291 | 0.954564  | 0.059966  |
| C | -1.127316 | 0.898897  | -0.728922 |
| C | -1.811300 | -0.289319 | -1.247499 |
| C | -2.383206 | -1.322647 | -0.600997 |
| H | -3.430854 | -2.081308 | 1.156346  |
| H | 0.008040  | -1.110782 | 0.594886  |
| H | -1.928560 | -0.250509 | -2.330437 |
| H | -2.890389 | -2.074841 | -1.199803 |
| O | 0.437707  | 2.199409  | 0.350117  |
| C | 1.856425  | 2.358999  | 0.386014  |
| H | 2.301147  | 2.079185  | -0.573291 |
| H | 2.032459  | 3.412695  | 0.597229  |
| H | 2.290575  | 1.747914  | 1.185868  |
| O | 1.774184  | -0.558046 | -0.345023 |
| O | 1.144653  | -0.091632 | 1.831891  |
| O | -1.884329 | -0.920159 | 1.708393  |
| N | 1.922458  | -1.935575 | -0.460751 |
| O | 2.832083  | -2.204793 | -1.148474 |
| H | -1.518336 | 1.794975  | -1.163718 |

---

## IM15

---

|   |           |           |           |
|---|-----------|-----------|-----------|
| C | 1.461291  | -1.488778 | -0.617415 |
| C | 2.472896  | -0.597900 | -0.600584 |
| C | 2.590335  | 0.601765  | 0.244122  |
| C | -0.537884 | 1.920916  | 0.166579  |
| C | -0.700876 | -0.392872 | -0.002969 |
| C | 0.142898  | -1.439603 | -0.005082 |
| H | 1.625985  | -2.425184 | -1.150189 |
| H | 3.362048  | -0.837644 | -1.177318 |
| O | -0.487975 | 3.003180  | -0.326763 |
| O | -0.438230 | 0.792375  | -0.618440 |
| O | 1.741690  | 1.028253  | 1.002706  |
| H | -0.687751 | 1.696263  | 1.230520  |
| O | -1.933241 | -0.532364 | 0.554990  |
| H | 3.574952  | 1.103731  | 0.189722  |
| C | -3.028389 | -0.206421 | -0.314789 |
| H | -3.016248 | 0.854638  | -0.575892 |
| H | -2.976470 | -0.809533 | -1.226578 |
| H | -3.932764 | -0.440590 | 0.244283  |
| H | -0.186940 | -2.394867 | 0.346454  |

---

## TS12-2-2

|   |           |           |           |
|---|-----------|-----------|-----------|
| C | 1.778865  | 0.846788  | 0.710810  |
| C | 2.659662  | -0.116971 | 0.368856  |
| C | 2.518415  | -1.049425 | -0.767092 |
| C | -0.634872 | -0.991798 | 0.715537  |
| C | -0.540220 | 0.221228  | -0.193372 |
| C | 0.474840  | 1.134370  | 0.134019  |
| H | 2.090618  | 1.592744  | 1.439716  |
| H | 3.617773  | -0.135433 | 0.880400  |
| O | -1.711926 | -1.778855 | 0.715201  |
| O | -1.043560 | -0.243380 | 1.778246  |
| O | 1.474220  | -1.314873 | -1.326658 |
| H | 0.331482  | -1.498335 | 0.824618  |
| O | -1.555134 | 0.759823  | -0.839820 |
| H | 3.467202  | -1.493939 | -1.121561 |
| C | -2.782908 | 0.029846  | -1.033227 |
| H | -2.567968 | -0.951778 | -1.457821 |
| H | -3.281505 | -0.097351 | -0.072746 |
| H | -3.361184 | 0.646700  | -1.718606 |
| H | 0.264062  | 2.164469  | -0.064395 |

## TS12-1

|   |           |           |           |
|---|-----------|-----------|-----------|
| C | 2.986292  | -1.157163 | -0.442302 |
| C | -0.348907 | -0.721609 | -0.553609 |
| C | 0.014355  | 0.686408  | -0.211918 |
| C | 0.976579  | 1.015415  | 0.678951  |
| C | 1.873147  | 0.128987  | 1.422457  |
| C | 2.698785  | -0.836343 | 0.972393  |
| H | 3.976269  | -1.626389 | -0.605396 |
| H | 0.320571  | -1.444275 | -0.083842 |
| H | 1.926968  | 0.382877  | 2.481131  |
| H | 3.335915  | -1.336739 | 1.697294  |
| O | -0.625960 | 1.752425  | -0.776326 |
| C | -2.004508 | 1.664948  | -1.142659 |
| H | -2.622815 | 1.445504  | -0.266465 |
| H | -2.255103 | 2.651322  | -1.533139 |
| H | -2.158176 | 0.901231  | -1.904312 |
| O | -1.704847 | -1.055477 | -0.410378 |
| O | -0.722934 | -0.991825 | -1.840415 |
| O | 2.263160  | -0.922979 | -1.387093 |
| N | -2.274002 | -1.063303 | 1.473144  |
| O | -3.393475 | -1.230765 | 1.489666  |
| H | 1.098857  | 2.061983  | 0.865078  |

## TS12-2-1

|   |           |           |           |
|---|-----------|-----------|-----------|
| C | 2.717587  | -0.254162 | -1.158546 |
| C | -0.489406 | 0.069670  | -1.080999 |
| C | -0.115158 | 0.569595  | 0.327750  |
| C | 0.822847  | -0.034310 | 1.194623  |
| C | 1.633064  | -1.206300 | 0.884026  |
| C | 2.422514  | -1.351593 | -0.192387 |
| H | 3.230854  | -0.553183 | -2.089425 |
| H | 0.093194  | -0.840369 | -1.322301 |
| H | 1.579937  | -1.996915 | 1.630147  |
| H | 2.933278  | -2.297171 | -0.351773 |
| O | -0.689579 | 1.618094  | 0.850644  |
| C | -1.779353 | 2.310667  | 0.180562  |
| H | -2.530053 | 1.589162  | -0.139109 |
| H | -2.160078 | 2.994110  | 0.936442  |
| H | -1.366886 | 2.821976  | -0.687627 |
| O | -1.924283 | -0.579488 | -0.765643 |
| O | -0.567655 | 1.013200  | -1.911947 |
| O | 2.454190  | 0.906119  | -0.941449 |
| N | -1.757160 | -1.712862 | -0.083822 |
| O | -2.785816 | -2.246475 | 0.192433  |
| H | 0.949569  | 0.405858  | 2.161625  |

## TS12-2

|   |           |           |           |
|---|-----------|-----------|-----------|
| C | -3.514737 | -0.048709 | 0.387366  |
| C | 1.428589  | -1.164715 | -0.271115 |
| C | 0.785783  | 0.096388  | -0.259572 |
| C | -0.575727 | 0.188035  | -0.500510 |
| C | -1.470486 | -0.930267 | -0.812873 |
| C | -2.774520 | -0.988125 | -0.503404 |
| H | -4.585144 | 0.091651  | 0.143269  |
| H | 0.843750  | -2.016475 | -0.628190 |
| H | -1.049931 | -1.743736 | -1.394667 |
| H | -3.360969 | -1.817395 | -0.893870 |
| O | 1.363671  | 1.284620  | 0.024832  |
| C | 2.745994  | 1.481043  | -0.309262 |
| H | 2.916855  | 1.206833  | -1.355298 |
| H | 2.920444  | 2.547629  | -0.173672 |
| H | 3.370270  | 0.889753  | 0.361451  |
| O | 2.674858  | -1.394109 | -0.033567 |
| O | 2.586910  | -0.888551 | 1.357031  |
| O | -3.022627 | 0.489888  | 1.348518  |
| H | -1.013512 | 1.163287  | -0.454377 |

## TS12-1

|   |           |           |           |
|---|-----------|-----------|-----------|
| C | 0.172753  | 2.591919  | 0.887784  |
| C | -0.226880 | -0.536052 | -0.077647 |
| C | 1.212801  | -0.624732 | -0.001971 |
| C | 2.021660  | 0.385209  | -0.426402 |
| C | 1.624718  | 1.685765  | -0.979830 |
| C | 0.799562  | 2.610504  | -0.460736 |
| H | -0.034551 | 3.597682  | 1.299987  |
| H | -0.689575 | 0.309005  | -0.593943 |
| H | 2.156619  | 1.929236  | -1.898575 |
| H | 0.679468  | 3.542531  | -1.007546 |
| O | 1.850911  | -1.725155 | 0.493576  |
| C | 1.430480  | -3.005907 | -0.002190 |
| H | 1.336397  | -2.975911 | -1.092672 |
| H | 2.217836  | -3.703010 | 0.283156  |
| H | 0.481556  | -3.298452 | 0.447171  |
| O | -0.082261 | 1.602909  | 1.535932  |
| O | -0.957097 | -1.419369 | 0.374000  |
| O | -2.530982 | -1.083999 | 0.013685  |
| N | -4.281969 | -0.467272 | -0.337873 |
| O | -4.374460 | 0.649565  | -0.560943 |
| H | 3.074150  | 0.209581  | -0.346900 |

## TS12-3

|   |           |           |           |
|---|-----------|-----------|-----------|
| C | 2.095105  | -0.021328 | 0.720305  |
| C | 0.026582  | -1.411292 | -0.287668 |
| C | -0.830843 | -0.267627 | -0.318922 |
| C | -0.593647 | 1.086003  | -0.282850 |
| C | 0.598337  | 1.867874  | 0.023986  |
| C | 1.780928  | 1.422705  | 0.469334  |
| H | 3.166067  | -0.267632 | 0.748952  |
| H | -0.441799 | -2.355861 | -0.016726 |
| H | 0.439255  | 2.933677  | -0.110894 |
| H | 2.573035  | 2.146966  | 0.646205  |
| O | -2.176263 | -0.634348 | -0.380447 |
| C | -2.760709 | -0.800506 | 0.917624  |
| H | -2.683243 | 0.126738  | 1.496346  |
| H | -3.806855 | -1.062124 | 0.756584  |
| H | -2.256804 | -1.603908 | 1.465051  |
| O | 1.141467  | -1.613537 | -0.897946 |
| O | 1.840502  | -0.457253 | -1.075823 |
| O | 1.292689  | -0.749332 | 1.362709  |
| H | -1.448928 | 1.680753  | -0.527118 |



## IM13-2

---

|   |           |           |           |
|---|-----------|-----------|-----------|
| C | -0.056576 | 2.208208  | 0.512974  |
| C | -1.081106 | 1.363546  | -0.127749 |
| C | -1.194379 | 0.017268  | -0.035188 |
| C | -0.258529 | -0.949032 | 0.601903  |
| C | 1.055640  | -1.046131 | 0.378891  |
| C | 1.821070  | -0.222671 | -0.572465 |
| H | -0.357606 | 3.271516  | 0.586994  |
| H | -1.883043 | 1.919397  | -0.600575 |
| H | 1.612191  | -1.827766 | 0.887041  |
| H | 1.280113  | 0.506323  | -1.173637 |
| O | -2.285316 | -0.669517 | -0.446698 |
| C | -3.377902 | 0.036147  | -1.017825 |
| H | -3.069337 | 0.542254  | -1.937775 |
| H | -4.128735 | -0.718102 | -1.246025 |
| H | -3.779646 | 0.763995  | -0.305465 |
| O | 1.016098  | 1.853284  | 0.951302  |
| O | 2.854981  | -0.879697 | -1.238411 |
| O | 3.106327  | 0.144607  | -0.209603 |
| H | -0.728591 | -1.639367 | 1.270767  |

---

## IM13-2-1

---

|   |           |           |           |
|---|-----------|-----------|-----------|
| C | -1.306807 | 2.213041  | -0.699130 |
| C | -1.800178 | 0.830762  | -0.837490 |
| C | -1.525530 | -0.213849 | -0.019784 |
| C | -0.581963 | -0.261977 | 1.131830  |
| C | 0.695051  | 0.126573  | 1.124610  |
| C | 1.433328  | 0.663058  | -0.055838 |
| H | -0.644780 | 2.349578  | 0.177749  |
| H | -2.554311 | 0.703522  | -1.605721 |
| H | 1.274377  | 0.015331  | 2.037416  |
| H | 0.820610  | 0.702702  | -0.962381 |
| O | -2.177010 | -1.396498 | -0.072788 |
| C | -3.182951 | -1.594642 | -1.056619 |
| H | -2.755642 | -1.515015 | -2.060817 |
| H | -3.559903 | -2.602609 | -0.894626 |
| H | -3.990347 | -0.865689 | -0.932547 |
| O | -1.545780 | 3.155506  | -1.424317 |
| O | 2.595231  | -0.121981 | -0.320200 |
| O | 2.060686  | 1.870442  | 0.205846  |
| N | 2.377008  | -1.448210 | -0.614514 |
| O | 3.429633  | -1.969375 | -0.725459 |
| H | -0.999153 | -0.677025 | 2.025467  |

---

## P14

---

|   |           |           |           |
|---|-----------|-----------|-----------|
| C | -0.289688 | 2.126533  | -0.013150 |
| C | -1.286427 | 1.081702  | -0.274122 |
| C | -1.278003 | -0.176221 | 0.241936  |
| C | -0.249430 | -0.792442 | 1.105479  |
| C | 1.057059  | -0.888664 | 0.854628  |
| H | -0.656656 | 3.147465  | -0.237644 |
| H | -2.156230 | 1.418180  | -0.826369 |
| H | 1.701041  | -1.381251 | 1.552872  |
| O | -2.302658 | -1.038632 | 0.107992  |
| C | -3.452541 | -0.640395 | -0.621857 |
| H | -3.192666 | -0.406052 | -1.659254 |
| H | -4.128604 | -1.492949 | -0.594341 |
| H | -3.926366 | 0.227752  | -0.151384 |
| O | 0.839672  | 1.976857  | 0.410630  |
| H | -0.656801 | -1.261001 | 1.998287  |
| O | 1.597099  | -0.333506 | -0.347477 |
| C | 3.025492  | -0.361927 | -0.285937 |
| H | 3.515964  | -0.760638 | 0.577409  |
| O | 3.798392  | 0.142510  | -1.378213 |

---

## P13

---

|   |           |           |           |
|---|-----------|-----------|-----------|
| C | 1.207067  | 1.437862  | -0.723167 |
| C | -0.121642 | 1.268305  | -0.107274 |
| C | -0.764493 | 0.092477  | -0.010733 |
| C | -0.250764 | -1.241725 | -0.430679 |
| C | 0.931531  | -1.816758 | -0.118530 |
| C | 1.947744  | -1.323826 | 0.819393  |
| H | 1.677342  | 0.542828  | -1.163455 |
| H | -0.588846 | 2.190907  | 0.219167  |
| H | 1.076192  | -2.825325 | -0.494779 |
| H | 2.651395  | -2.111519 | 1.151351  |
| O | -2.052291 | -0.062113 | 0.397031  |
| C | -2.768630 | 1.101097  | 0.787333  |
| H | -2.837072 | 1.807412  | -0.046786 |
| H | -3.761414 | 0.757464  | 1.072202  |
| H | -2.280630 | 1.580468  | 1.641410  |
| O | 1.736221  | 2.525061  | -0.799190 |
| O | 2.063964  | -0.194176 | 1.251385  |
| H | -0.945171 | -1.810023 | -1.013548 |

---

## TS13-2

---

|   |           |           |           |
|---|-----------|-----------|-----------|
| C | 0.188723  | 2.283525  | -0.457297 |
| C | 1.098628  | 1.340563  | 0.229728  |
| C | 1.184367  | 0.004473  | 0.045047  |
| C | 0.312709  | -0.869805 | -0.796096 |
| C | -1.035344 | -0.953036 | -0.735724 |
| C | -1.806190 | -0.205601 | 0.205268  |
| H | 0.500788  | 3.339767  | -0.349279 |
| H | 1.844400  | 1.820282  | 0.853706  |
| H | -1.543889 | -1.669323 | -1.371697 |
| H | -1.349291 | 0.482941  | 0.910622  |
| O | 2.178133  | -0.768301 | 0.534162  |
| C | 3.175920  | -0.175449 | 1.357222  |
| H | 2.721108  | 0.255713  | 2.253955  |
| H | 3.845815  | -0.986511 | 1.635195  |
| H | 3.722934  | 0.593919  | 0.802772  |
| O | -0.796566 | 2.005217  | -1.103050 |
| O | -3.074633 | -0.568010 | 1.672850  |
| O | -3.081151 | -0.320652 | 0.221938  |
| H | 0.803053  | -1.490626 | -1.516543 |

---

TS2213-2-1-NO<sub>2</sub>

---

|   |           |           |           |
|---|-----------|-----------|-----------|
| C | 0.000000  | 0.000000  | 0.000000  |
| C | 0.000000  | 0.000000  | 1.471416  |
| C | 1.076066  | 0.000000  | 2.302079  |
| C | 2.520986  | -0.098593 | 1.945347  |
| C | 3.130762  | -1.096706 | 1.278072  |
| C | 2.458208  | -2.304141 | 0.744755  |
| H | -0.996219 | 0.231764  | -0.429644 |
| H | -0.985288 | 0.107917  | 1.912084  |
| H | 4.202900  | -1.042973 | 1.125603  |
| H | 1.348182  | -2.324574 | 0.814406  |
| O | 0.998724  | 0.201474  | 3.641892  |
| C | -0.279904 | 0.344034  | 4.275906  |
| H | -0.881222 | -0.557857 | 4.126846  |
| H | -0.062509 | 0.472915  | 5.335386  |
| H | -0.808030 | 1.222393  | 3.890001  |
| O | 0.947580  | -0.209852 | -0.739657 |
| O | 2.615103  | -3.450883 | 2.166804  |
| O | 2.971907  | -2.858531 | -0.259093 |
| N | 1.392841  | -3.596892 | 2.555555  |
| O | 1.183591  | -4.284882 | 3.526318  |
| H | 3.130851  | 0.691691  | 2.330593  |

---

## TS13-1

---

|   |           |           |           |
|---|-----------|-----------|-----------|
| C | -1.608562 | 2.130340  | -0.725425 |
| C | -1.936476 | 0.697862  | -0.848857 |
| C | -1.545050 | -0.295354 | -0.016252 |
| C | -0.593639 | -0.223845 | 1.125346  |
| C | 0.645662  | 0.272959  | 1.091623  |
| C | 1.336814  | 0.821297  | -0.105530 |
| H | -2.290002 | 2.779986  | -1.309903 |
| H | -2.668888 | 0.475683  | -1.616695 |
| H | 1.243210  | 0.232548  | 1.998568  |
| H | 0.750885  | 0.806183  | -1.030151 |
| O | -2.068566 | -1.544807 | -0.049257 |
| C | -3.057847 | -1.856823 | -1.018517 |
| H | -2.653868 | -1.741603 | -2.029102 |
| H | -3.324616 | -2.897645 | -0.843910 |
| H | -3.937686 | -1.217074 | -0.892399 |
| O | -0.721743 | 2.626290  | -0.066018 |
| O | 2.636240  | 0.319146  | -0.266598 |
| O | 2.107383  | 1.936372  | 0.083163  |
| N | 2.637676  | -1.600777 | -0.637776 |
| O | 3.711614  | -1.958644 | -0.597687 |
| H | -0.935228 | -0.607458 | 2.063993  |

---

## TS7-2-2

---

|   |           |           |           |
|---|-----------|-----------|-----------|
| C | -0.693820 | 0.482939  | -0.050275 |
| C | -2.030539 | 0.795923  | -0.033271 |
| C | -3.195850 | -0.062055 | -0.026751 |
| C | 2.458070  | -0.132176 | -0.269813 |
| C | 1.285996  | -1.090264 | -0.194040 |
| C | -0.069434 | -0.870321 | -0.052953 |
| H | -2.285047 | 1.848235  | -0.033523 |
| H | 1.605265  | -2.120966 | -0.068989 |
| O | 3.664777  | -0.650772 | -0.504649 |
| O | 2.533401  | -0.085572 | 1.075332  |
| O | -3.231051 | -1.291367 | 0.009689  |
| H | 2.262125  | 0.807378  | -0.805580 |
| H | -4.153909 | 0.478823  | -0.053473 |
| O | 0.239639  | 1.427717  | -0.063884 |
| C | -0.104918 | 2.805856  | -0.021555 |
| H | -0.665576 | 3.028836  | 0.891153  |
| H | 0.844877  | 3.336886  | -0.011689 |
| H | -0.684506 | 3.087391  | -0.905953 |
| H | -0.708841 | -1.720646 | 0.061092  |

---

## TS13-3

---

|   |           |           |           |
|---|-----------|-----------|-----------|
| C | -1.224332 | -1.417351 | -0.564488 |
| C | 0.273220  | -1.408621 | -0.560256 |
| C | 1.011271  | -0.311913 | -0.364617 |
| C | 0.548007  | 1.084949  | -0.185997 |
| C | -0.703801 | 1.614115  | -0.050135 |
| C | -1.984777 | 1.037295  | 0.185110  |
| H | -1.674387 | -2.398791 | -0.358688 |
| H | 0.799954  | -2.351073 | -0.695314 |
| H | -0.744577 | 2.687796  | -0.210336 |
| H | -2.858784 | 1.624342  | -0.086891 |
| O | 2.395218  | -0.395958 | -0.391331 |
| C | 2.958497  | -0.770518 | 0.870454  |
| H | 2.618194  | -1.771638 | 1.150792  |
| H | 4.040592  | -0.766185 | 0.740121  |
| H | 2.668620  | -0.056987 | 1.650616  |
| O | -1.872726 | -0.586651 | -1.251167 |
| O | -1.305630 | -0.791970 | 1.192929  |
| O | -2.315771 | 0.108862  | 1.019561  |
| H | 1.335770  | 1.808536  | -0.158589 |

---

## TS13-1

---

|   |           |           |           |
|---|-----------|-----------|-----------|
| C | 0.670636  | -1.170472 | 1.865506  |
| C | 1.526751  | -1.289473 | 0.664635  |
| C | 1.983450  | -0.285051 | -0.117318 |
| C | 1.633679  | 1.163570  | -0.050766 |
| C | 0.390438  | 1.679729  | -0.026137 |
| C | -0.794407 | 0.858949  | -0.129520 |
| H | 0.712679  | -2.065770 | 2.514359  |
| H | 1.919606  | -2.286686 | 0.500232  |
| H | 0.268360  | 2.756555  | 0.018879  |
| H | -0.730605 | -0.218836 | -0.307744 |
| O | 2.946854  | -0.433303 | -1.054297 |
| C | 3.486696  | -1.727374 | -1.291992 |
| H | 2.702133  | -2.410434 | -1.631071 |
| H | 4.229551  | -1.596972 | -2.076242 |
| H | 3.960068  | -2.117863 | -0.385286 |
| O | -0.012859 | -0.223853 | 2.184658  |
| O | -1.917728 | 1.359358  | -0.085721 |
| O | -3.042588 | 0.181794  | -0.356140 |
| N | -4.457110 | -1.034474 | -0.641315 |
| O | -5.507089 | -0.596891 | -0.543582 |
| H | 2.473180  | 1.826932  | -0.060216 |

---

## IM14-2

---

|   |           |           |           |
|---|-----------|-----------|-----------|
| C | 1.584300  | -0.506586 | 0.514759  |
| C | 0.320208  | -1.028820 | -0.040715 |
| C | -0.845208 | -0.369592 | -0.028203 |
| C | -1.087833 | 1.002310  | 0.497644  |
| C | -0.403305 | 2.135741  | 0.224462  |
| C | 0.653779  | 2.314049  | -0.776700 |
| H | 1.574230  | 0.468083  | 0.998001  |
| H | 0.392300  | -2.041621 | -0.421377 |
| H | -0.783267 | 3.040460  | 0.689737  |
| H | 0.828040  | 3.373865  | -1.045256 |
| O | -2.046105 | -0.900620 | -0.395887 |
| C | -2.056003 | -2.235395 | -0.878053 |
| H | -1.684407 | -2.925255 | -0.112531 |
| H | -3.094894 | -2.460575 | -1.112653 |
| H | -1.443902 | -2.318593 | -1.781766 |
| O | 2.747550  | -0.833203 | -0.158969 |
| O | 2.395242  | -1.463114 | 1.125599  |
| O | 1.304073  | 1.441741  | -1.318996 |
| H | -1.942362 | 1.076160  | 1.137353  |

---

## IM14-2-1

---

|   |           |           |           |
|---|-----------|-----------|-----------|
| C | 1.171746  | -0.112154 | -0.763723 |
| C | -0.156003 | -0.820105 | -0.786797 |
| C | -1.191431 | -0.495179 | -0.006265 |
| C | -1.233009 | 0.591283  | 1.014933  |
| C | -1.033541 | 1.916136  | 0.840451  |
| C | -0.850957 | 2.614561  | -0.436605 |
| H | 1.089465  | 0.915347  | -0.379638 |
| H | -0.201322 | -1.682382 | -1.441295 |
| H | -1.157166 | 2.536559  | 1.723087  |
| H | -1.017777 | 3.706915  | -0.371815 |
| O | -2.339564 | -1.219250 | 0.102721  |
| C | -2.476466 | -2.366172 | -0.722036 |
| H | -1.692984 | -3.098632 | -0.497872 |
| H | -3.454963 | -2.784106 | -0.491742 |
| H | -2.432143 | -2.084125 | -1.778892 |
| O | 1.674664  | -0.033060 | -2.009983 |
| O | 2.018550  | -0.869207 | 0.126555  |
| O | -0.558178 | 2.109304  | -1.502942 |
| N | 3.040206  | -0.062945 | 0.610932  |
| O | 3.780984  | -0.681976 | 1.276470  |
| H | -1.499684 | 0.248622  | 1.992874  |

---

## P16

---

|   |           |           |           |
|---|-----------|-----------|-----------|
| C | 1.696818  | -1.555621 | -0.495793 |
| C | 2.549057  | -0.505339 | -0.463393 |
| C | 2.428244  | 0.706055  | 0.356985  |
| C | -0.841424 | 1.535265  | 0.005530  |
| C | -0.608859 | -0.793869 | 0.063703  |
| C | 0.373094  | -1.710475 | 0.076428  |
| H | 2.063947  | -2.448216 | -1.002921 |
| H | 3.494996  | -0.604748 | -0.989063 |
| O | -0.913211 | 2.558009  | -0.599686 |
| O | -0.521785 | 0.363721  | -0.645404 |
| O | 1.474424  | 1.019896  | 1.046206  |
| H | -1.027270 | 1.400620  | 1.078445  |
| H | 3.331567  | 1.345889  | 0.360467  |
| H | -1.494556 | -0.981755 | 0.633913  |
| O | 0.008460  | -2.995656 | 0.586576  |
| C | 1.190565  | -3.743577 | 0.883461  |
| H | 0.922240  | -4.652211 | 1.380740  |
| H | 1.705110  | -3.973322 | -0.026133 |
| H | 1.828857  | -3.164832 | 1.517919  |

---

## TS14-2

---

|   |           |           |           |
|---|-----------|-----------|-----------|
| C | 1.546996  | -0.475001 | 0.145316  |
| C | 0.291923  | -1.019968 | -0.285561 |
| C | -0.885033 | -0.399262 | -0.036972 |
| C | -1.063793 | 0.933057  | 0.608604  |
| C | -0.458060 | 2.094984  | 0.282753  |
| C | 0.429249  | 2.367243  | -0.860463 |
| H | 1.613439  | 0.442990  | 0.722512  |
| H | 0.329035  | -1.993771 | -0.758433 |
| H | -0.779796 | 2.962782  | 0.851343  |
| H | 0.511868  | 3.444430  | -1.098249 |
| O | -2.095283 | -0.942749 | -0.248448 |
| C | -2.164074 | -2.257476 | -0.797567 |
| H | -1.658414 | -2.969744 | -0.138480 |
| H | -3.224338 | -2.491416 | -0.866414 |
| H | -1.710967 | -2.274439 | -1.792687 |
| O | 2.628167  | -1.085605 | -0.155946 |
| O | 3.082139  | -1.065414 | 1.244402  |
| O | 1.027681  | 1.553920  | -1.534536 |
| H | -1.800611 | 0.948820  | 1.384330  |

---

TS14-2-1-NO<sub>2</sub>

---

|   |           |           |           |
|---|-----------|-----------|-----------|
| C | -0.851164 | 0.192467  | 1.039099  |
| C | 0.315948  | -0.688402 | 0.771439  |
| C | 1.117732  | -0.601847 | -0.309087 |
| C | 1.026572  | 0.383831  | -1.421818 |
| C | 1.012247  | 1.740517  | -1.345852 |
| C | 1.228162  | 2.584866  | -0.167876 |
| H | -1.038262 | 1.010002  | 0.307052  |
| H | 0.469297  | -1.454442 | 1.520545  |
| H | 0.955379  | 2.262094  | -2.297665 |
| H | 1.381192  | 3.653055  | -0.422942 |
| O | 2.080385  | -1.516685 | -0.620912 |
| C | 2.303924  | -2.622728 | 0.262588  |
| H | 1.398710  | -3.232393 | 0.356545  |
| H | 3.102173  | -3.204442 | -0.196933 |
| H | 2.623186  | -2.267126 | 1.247555  |
| O | -1.133973 | 0.423966  | 2.240405  |
| O | -2.190016 | -0.831835 | 0.336263  |
| O | 1.268551  | 2.227969  | 1.001555  |
| N | -2.651066 | -0.102214 | -0.628084 |
| O | -3.552342 | -0.547718 | -1.292503 |
| H | 0.964413  | -0.029041 | -2.406995 |

---



## TS14-2-1

---

|   |           |           |           |
|---|-----------|-----------|-----------|
| C | -1.002591 | -0.922765 | -0.362393 |
| C | -0.222698 | 0.262733  | -0.819200 |
| C | 0.884705  | 0.735329  | -0.235913 |
| C | 1.579118  | 0.168144  | 0.952749  |
| C | 1.976503  | -1.106729 | 1.161341  |
| C | 1.949928  | -2.210079 | 0.194531  |
| H | -0.608448 | -1.430360 | 0.522268  |
| H | -0.667976 | 0.770175  | -1.669066 |
| H | 2.503447  | -1.293007 | 2.092435  |
| H | 2.600304  | -3.059373 | 0.481473  |
| O | 1.507923  | 1.907063  | -0.566928 |
| C | 0.969441  | 2.655020  | -1.644025 |
| H | -0.061967 | 2.956290  | -1.428230 |
| H | 1.602673  | 3.535303  | -1.743451 |
| H | 0.996646  | 2.070066  | -2.568967 |
| O | -1.497188 | -1.732972 | -1.346190 |
| O | -2.380504 | -0.670093 | -0.294844 |
| O | 1.323789  | -2.257047 | -0.845910 |
| N | -2.836808 | 0.607555  | 1.116355  |
| O | -3.958598 | 0.760702  | 1.088697  |
| H | 1.813200  | 0.894234  | 1.703015  |

---

## TS14-2-2

---

|   |           |           |           |
|---|-----------|-----------|-----------|
| C | -0.275776 | -1.352399 | -0.516047 |
| C | 0.902332  | -1.995171 | -0.335841 |
| C | 1.922792  | -1.702246 | 0.675107  |
| C | 1.125002  | 1.395382  | -0.436639 |
| C | -0.018471 | 0.999884  | 0.444668  |
| C | -0.752358 | -0.139680 | 0.189815  |
| H | 1.045737  | -2.893988 | -0.927862 |
| H | -0.413821 | 1.809409  | 1.046647  |
| O | 1.726144  | 2.573644  | -0.282695 |
| O | 0.134273  | 1.888076  | -1.244717 |
| O | 1.978460  | -0.714420 | 1.381876  |
| H | 1.739343  | 0.580925  | -0.837109 |
| H | 2.687364  | -2.495276 | 0.777663  |
| O | -2.060910 | -0.266423 | 0.472737  |
| C | -2.758467 | 0.856536  | 1.008906  |
| H | -3.801684 | 0.552989  | 1.066268  |
| H | -2.385145 | 1.093737  | 2.008832  |
| H | -2.642481 | 1.719213  | 0.344996  |
| H | -0.982333 | -1.784747 | -1.193360 |

---

## TS14-3

---

|   |           |           |           |
|---|-----------|-----------|-----------|
| C | -1.090492 | -1.635323 | -0.156168 |
| C | 0.295085  | -1.273797 | -0.233264 |
| C | 0.970779  | -0.100356 | -0.069159 |
| C | 0.507407  | 1.305275  | 0.021023  |
| C | -0.748531 | 1.748856  | -0.144892 |
| C | -1.928121 | 0.904091  | -0.444446 |
| H | -1.404283 | -2.533341 | -0.682941 |
| H | 0.892117  | -2.126923 | -0.536211 |
| H | -0.909278 | 2.813898  | -0.001356 |
| H | -2.895207 | 1.342882  | -0.161772 |
| O | 2.326586  | -0.098235 | -0.060533 |
| C | 3.054844  | -1.315967 | -0.039121 |
| H | 2.962624  | -1.837569 | -0.996787 |
| H | 4.093942  | -1.034350 | 0.123079  |
| H | 2.704192  | -1.956077 | 0.776271  |
| O | -1.948468 | -1.313798 | 0.743109  |
| O | -1.709488 | -0.084789 | 1.269125  |
| O | -1.911063 | -0.008943 | -1.301189 |
| H | 1.267542  | 2.027561  | 0.234089  |

---

## TS14-1

---

|   |           |           |           |
|---|-----------|-----------|-----------|
| C | -0.587808 | -0.872535 | -0.011440 |
| C | 0.821701  | -1.164392 | 0.172315  |
| C | 1.787003  | -0.264075 | -0.101357 |
| C | 1.585935  | 1.147024  | -0.537983 |
| C | 0.785106  | 2.079538  | 0.021244  |
| C | 0.022145  | 1.976464  | 1.275391  |
| H | -0.926923 | 0.070262  | -0.449665 |
| H | 1.060538  | -2.171742 | 0.491960  |
| H | 0.831849  | 3.066558  | -0.429703 |
| H | -0.261049 | 2.959847  | 1.695138  |
| O | 3.109857  | -0.534212 | -0.114596 |
| C | 3.531480  | -1.856730 | 0.202115  |
| H | 3.096518  | -2.574212 | -0.500815 |
| H | 4.615834  | -1.850403 | 0.111902  |
| H | 3.243929  | -2.111057 | 1.226406  |
| O | -0.285503 | 0.959581  | 1.863544  |
| O | -1.431989 | -1.724818 | 0.256098  |
| O | -2.931772 | -1.194928 | -0.178413 |
| N | -4.588925 | -0.385015 | -0.565380 |
| O | -4.591634 | 0.757499  | -0.559178 |
| H | 2.194369  | 1.436889  | -1.369058 |

---

## IM15-2

---

|   |           |           |           |
|---|-----------|-----------|-----------|
| C | 1.418639  | -1.255591 | 0.295468  |
| C | 0.180578  | -0.718622 | 0.301922  |
| C | -0.233236 | 0.588411  | -0.184436 |
| C | -1.513717 | 0.951890  | -0.425301 |
| C | -2.743202 | 0.127321  | -0.246950 |
| C | 2.642314  | -0.688765 | -0.305308 |
| H | 1.563059  | -2.235881 | 0.742193  |
| H | -0.622720 | -1.310176 | 0.730046  |
| H | -3.655100 | 0.644705  | -0.546306 |
| H | 2.547189  | 0.240481  | -0.891737 |
| O | 0.701985  | 1.559926  | -0.490030 |
| C | 1.336744  | 2.131007  | 0.660015  |
| H | 1.859229  | 1.364055  | 1.240029  |
| H | 2.053433  | 2.861435  | 0.285069  |
| H | 0.593364  | 2.623742  | 1.296036  |
| O | 3.719927  | -1.237812 | -0.188089 |
| O | -2.857506 | -0.704012 | 0.858229  |
| O | -2.702988 | -1.233473 | -0.507600 |
| H | -1.758519 | 1.920707  | -0.807880 |

---

## IM15-2-1

---

|   |           |           |           |
|---|-----------|-----------|-----------|
| C | 2.002395  | -1.480540 | 0.502529  |
| C | 0.903505  | -0.709808 | 0.644336  |
| C | 0.613242  | 0.569623  | 0.019936  |
| C | -0.621847 | 1.116226  | -0.062586 |
| C | -1.901807 | 0.546576  | 0.489033  |
| C | 3.140163  | -1.256235 | -0.410203 |
| H | 2.074163  | -2.397859 | 1.080971  |
| H | 0.124090  | -1.064235 | 1.313100  |
| H | -2.695198 | 1.300348  | 0.392095  |
| H | 3.073787  | -0.413335 | -1.118606 |
| O | 1.603723  | 1.292024  | -0.618197 |
| C | 2.556072  | 1.881265  | 0.274310  |
| H | 3.072467  | 1.113395  | 0.858668  |
| H | 3.273928  | 2.413261  | -0.349825 |
| H | 2.055670  | 2.579583  | 0.953700  |
| O | 4.110667  | -1.987609 | -0.409217 |
| O | -1.806425 | 0.102071  | 1.805857  |
| O | -2.257238 | -0.617528 | -0.238905 |
| N | -3.682248 | -0.714014 | -0.327947 |
| O | -3.980253 | -1.695437 | -0.871908 |
| H | -0.794457 | 2.033219  | -0.586255 |

---

## P18

---

|   |           |           |           |
|---|-----------|-----------|-----------|
| C | 1.696818  | -1.555621 | -0.495793 |
| C | 2.549057  | -0.505339 | -0.463393 |
| C | 2.428244  | 0.706055  | 0.356985  |
| C | -0.841424 | 1.535265  | 0.005530  |
| C | -0.608859 | -0.793869 | 0.063703  |
| C | 0.373094  | -1.710475 | 0.076428  |
| H | 2.063947  | -2.448216 | -1.002921 |
| H | 3.494996  | -0.604748 | -0.989063 |
| O | -0.913211 | 2.558009  | -0.599686 |
| O | -0.521785 | 0.363721  | -0.645404 |
| O | 1.474424  | 1.019896  | 1.046206  |
| H | -1.027270 | 1.400620  | 1.078445  |
| H | 3.331567  | 1.345889  | 0.360467  |
| H | -1.494556 | -0.981755 | 0.633913  |
| O | 0.008460  | -2.995656 | 0.586576  |
| C | 1.190565  | -3.743577 | 0.883461  |
| H | 0.922240  | -4.652211 | 1.380740  |
| H | 1.705110  | -3.973322 | -0.026133 |
| H | 1.828857  | -3.164832 | 1.517919  |

---

## IM15-3

---

|   |           |           |           |
|---|-----------|-----------|-----------|
| C | -0.792059 | 1.958559  | -0.274734 |
| C | 0.482387  | 1.574626  | -0.443706 |
| C | 1.015468  | 0.217611  | -0.379114 |
| C | 0.345416  | -0.953523 | -0.336417 |
| C | -1.153525 | -1.135815 | -0.330611 |
| C | -1.867687 | 0.944843  | -0.017869 |
| H | -1.071509 | 3.001901  | -0.368229 |
| H | 1.233838  | 2.330818  | -0.661392 |
| H | -1.428038 | -2.095663 | -0.773366 |
| H | -2.878058 | 1.361494  | -0.017275 |
| O | 2.400226  | 0.098999  | -0.392357 |
| C | 3.014604  | 0.543946  | 0.815631  |
| H | 2.645389  | -0.033852 | 1.670889  |
| H | 4.087600  | 0.392739  | 0.694049  |
| H | 2.813612  | 1.606703  | 0.989428  |
| O | -1.580522 | 0.304133  | 1.245592  |
| O | -1.675340 | -1.101136 | 0.977929  |
| O | -1.837952 | -0.100934 | -0.971004 |
| H | 0.857032  | -1.892380 | -0.295234 |

---

## P17

---

|   |           |           |           |
|---|-----------|-----------|-----------|
| C | -0.855654 | -1.189529 | 0.782356  |
| C | 0.334989  | -0.613782 | 1.002616  |
| C | 1.035487  | 0.362684  | 0.161155  |
| C | 0.590495  | 1.551993  | -0.309830 |
| C | -0.737730 | 2.168241  | -0.078160 |
| C | -1.639414 | -1.032569 | -0.463575 |
| H | -1.279169 | -1.871324 | 1.515071  |
| H | 0.895915  | -0.888544 | 1.896915  |
| H | -0.731986 | 3.260880  | -0.248156 |
| H | -1.170496 | -0.440889 | -1.270571 |
| O | 2.388200  | 0.160544  | -0.003449 |
| C | 2.761635  | -1.131267 | -0.483267 |
| H | 2.301341  | -1.322330 | -1.458516 |
| H | 3.846786  | -1.117352 | -0.578004 |
| H | 2.463829  | -1.913734 | 0.220627  |
| O | -2.710715 | -1.572274 | -0.622153 |
| O | -1.742093 | 1.583047  | 0.258740  |
| H | 1.251793  | 2.228142  | -0.810238 |

---

## TS15-1

---

|   |           |           |           |
|---|-----------|-----------|-----------|
| C | 1.984786  | -1.750279 | 0.216765  |
| C | 1.027654  | -0.814123 | 0.373630  |
| C | 1.117615  | 0.596851  | 0.019297  |
| C | 0.054954  | 1.405578  | -0.245189 |
| C | -1.354965 | 1.024731  | -0.230688 |
| C | 3.289027  | -1.580753 | -0.462398 |
| H | 1.796078  | -2.760272 | 0.571505  |
| H | 0.080353  | -1.121177 | 0.805977  |
| H | -2.097577 | 1.824135  | -0.335451 |
| H | 3.482230  | -0.621546 | -0.972749 |
| O | 2.335173  | 1.216720  | -0.109552 |
| C | 3.134793  | 1.266777  | 1.080877  |
| H | 3.403687  | 0.262754  | 1.419026  |
| H | 4.033979  | 1.820029  | 0.813748  |
| H | 2.591347  | 1.788593  | 1.874574  |
| O | 4.110444  | -2.473133 | -0.482714 |
| O | -1.746193 | -0.132298 | -0.098161 |
| O | -3.386334 | -0.172803 | -0.029872 |
| N | -5.290386 | -0.373037 | 0.075019  |
| O | -5.650357 | -1.446645 | 0.203102  |
| H | 0.275070  | 2.424034  | -0.488491 |

---

## TS15-3

---

|   |           |           |           |
|---|-----------|-----------|-----------|
| C | 0.612802  | -1.982214 | -0.016383 |
| C | -0.579712 | -1.435820 | -0.300954 |
| C | -0.993734 | -0.046698 | -0.189021 |
| C | -0.286988 | 1.103988  | 0.019145  |
| C | 1.129913  | 1.373012  | 0.151182  |
| C | 1.773415  | -1.222309 | 0.523954  |
| H | 0.764857  | -3.037739 | -0.228404 |
| H | -1.348721 | -2.095174 | -0.691045 |
| H | 1.379436  | 2.267123  | 0.717360  |
| H | 2.753284  | -1.710060 | 0.422351  |
| O | -2.343215 | 0.211867  | -0.282169 |
| C | -3.272343 | -0.775154 | 0.153829  |
| H | -2.931309 | -1.252472 | 1.077226  |
| H | -4.207016 | -0.244579 | 0.335353  |
| H | -3.437387 | -1.529918 | -0.620057 |
| O | 1.629774  | -0.330123 | 1.390961  |
| O | 1.899942  | -0.223201 | -1.155741 |
| O | 2.104108  | 0.990981  | -0.585928 |
| H | -0.813293 | 2.021945  | 0.178072  |

---

## TS15-2-2

---

|   |           |           |           |
|---|-----------|-----------|-----------|
| C | -0.435423 | -1.179379 | 1.078586  |
| C | -1.746962 | -1.324676 | 0.836532  |
| C | -2.436616 | -1.008282 | -0.439321 |
| C | -0.227633 | 1.724257  | 0.125641  |
| C | 0.664419  | 0.616196  | -0.357944 |
| C | 0.616278  | -0.649094 | 0.183594  |
| H | -2.360482 | -1.790170 | 1.603539  |
| H | 1.512903  | 0.956770  | -0.938972 |
| O | -0.154973 | 2.936519  | -0.423579 |
| O | 0.681790  | 1.941484  | 1.112137  |
| O | -1.971061 | -0.321389 | -1.320162 |
| H | -1.233391 | 1.405521  | 0.435240  |
| H | -3.438418 | -1.464044 | -0.553136 |
| H | -0.038800 | -1.563822 | 2.016732  |
| O | 1.686560  | -1.536202 | -0.151719 |
| C | 2.937448  | -0.888011 | 0.093287  |
| H | 3.721375  | -1.616244 | 0.099256  |
| H | 3.123871  | -0.169594 | -0.677442 |
| H | 2.903077  | -0.393186 | 1.041373  |

---

## TS15-1

|   |           |           |           |
|---|-----------|-----------|-----------|
| C | -1.783198 | 1.149810  | 0.832688  |
| C | -0.652627 | 0.410333  | 0.838410  |
| C | -0.306874 | -0.714334 | -0.015761 |
| C | 0.949044  | -1.194366 | -0.165779 |
| C | 2.199752  | -0.670045 | 0.489092  |
| C | -2.905013 | 1.057528  | -0.119668 |
| H | -1.896443 | 1.935458  | 1.575228  |
| H | 0.112170  | 0.654614  | 1.570594  |
| H | 3.082167  | -1.194489 | 0.103433  |
| H | -2.811502 | 0.342464  | -0.954737 |
| O | -1.266426 | -1.343929 | -0.791202 |
| C | -2.187878 | -2.133888 | -0.032332 |
| H | -2.713052 | -1.520488 | 0.706664  |
| H | -2.903464 | -2.544062 | -0.744934 |
| H | -1.659220 | -2.944373 | 0.480948  |
| O | -3.891994 | 1.760034  | -0.016027 |
| O | 2.185662  | -0.438688 | 1.837775  |
| O | 2.326453  | 0.712761  | 0.563644  |
| N | 2.225215  | 1.582897  | -1.227512 |
| O | 2.048938  | 2.684038  | -1.050999 |
| H | 1.065988  | -2.034510 | -0.817992 |

## TS15-2

|   |           |           |           |
|---|-----------|-----------|-----------|
| C | 1.624849  | -1.277702 | 0.294018  |
| C | 0.387505  | -0.807975 | 0.546484  |
| C | -0.141432 | 0.473306  | 0.091707  |
| C | -1.430452 | 0.670419  | -0.326169 |
| C | -2.408792 | -0.344359 | -0.616980 |
| C | 2.614349  | -0.639748 | -0.601393 |
| H | 1.934381  | -2.231582 | 0.713376  |
| H | -0.329644 | -1.399797 | 1.115714  |
| H | -3.230221 | 0.001119  | -1.256457 |
| H | 2.286289  | 0.256697  | -1.160848 |
| O | 0.635829  | 1.589883  | 0.002693  |
| C | 1.524051  | 1.875292  | 1.093060  |
| H | 2.418794  | 1.250244  | 1.055738  |
| H | 1.804110  | 2.920927  | 0.973927  |
| H | 1.009567  | 1.727155  | 2.046088  |
| O | 3.733435  | -1.083827 | -0.744513 |
| O | -2.378541 | -1.397672 | 1.112426  |
| O | -2.364494 | -1.598008 | -0.353792 |
| H | -1.761845 | 1.636262  | -0.645897 |

## TS15-2-1-NO2

|   |           |           |           |
|---|-----------|-----------|-----------|
| C | -1.951489 | 1.008508  | 1.016369  |
| C | -0.905185 | 0.149022  | 1.121807  |
| C | -0.468482 | -0.763269 | 0.105765  |
| C | 0.907143  | -1.127642 | -0.023280 |
| C | 1.994657  | -0.650474 | 0.927631  |
| C | -2.679696 | 1.309960  | -0.234547 |
| H | -2.232472 | 1.614844  | 1.873038  |
| H | -0.270690 | 0.144626  | 2.007684  |
| H | 2.988791  | -0.963190 | 0.563927  |
| H | -2.206291 | 0.981418  | -1.180025 |
| O | -1.238912 | -1.321173 | -0.838007 |
| C | -2.610817 | -1.682647 | -0.576143 |
| H | -2.825968 | -1.605311 | 0.490280  |
| H | -3.270058 | -1.028541 | -1.147587 |
| H | -2.721631 | -2.710888 | -0.918794 |
| O | -3.720335 | 1.929369  | -0.243647 |
| O | 1.716413  | -0.555456 | 2.132529  |
| O | 1.900044  | 0.862957  | 0.057244  |
| N | 3.012806  | 1.064336  | -0.651913 |
| O | 2.973431  | 2.068507  | -1.294545 |
| H | 1.187281  | -1.770246 | -0.831663 |

## TS16-2

|   |           |           |           |
|---|-----------|-----------|-----------|
| C | 1.347362  | 0.495063  | 0.848609  |
| C | 0.041732  | 0.718951  | 1.089951  |
| C | -1.111418 | 0.329779  | 0.273116  |
| C | -1.470113 | -0.914714 | -0.130040 |
| C | -0.775405 | -2.185621 | 0.176672  |
| C | 1.807568  | -0.156976 | -0.359735 |
| H | 2.112176  | 0.823872  | 1.540621  |
| H | -0.226119 | 1.281871  | 1.983847  |
| H | -1.445136 | -3.062228 | 0.108994  |
| H | 1.074594  | -0.542495 | -1.072239 |
| O | -2.074162 | 1.285361  | 0.063958  |
| C | -1.609473 | 2.584773  | -0.308552 |
| H | -0.975124 | 2.523578  | -1.198249 |
| H | -2.502115 | 3.169866  | -0.525273 |
| H | -1.052475 | 3.053702  | 0.506862  |
| O | 3.038143  | -0.389960 | -0.619923 |
| O | 3.401154  | 1.020095  | -0.433371 |
| O | 0.395202  | -2.304081 | 0.468691  |
| H | -2.410278 | -1.087742 | -0.610717 |



## TS16-3

---

|   |           |           |           |
|---|-----------|-----------|-----------|
| C | 1.051147  | -1.721818 | -0.491549 |
| C | -0.283560 | -1.429697 | -0.516817 |
| C | -1.036935 | -0.232731 | -0.337294 |
| C | -0.557160 | 1.034217  | -0.197568 |
| C | 0.904039  | 1.383095  | -0.164501 |
| C | 2.202835  | -0.969657 | -0.099773 |
| H | 1.329653  | -2.685085 | -0.910816 |
| H | -0.918646 | -2.261890 | -0.822030 |
| H | 1.103952  | 2.365280  | 0.287191  |
| H | 3.170075  | -1.269545 | -0.498164 |
| O | -2.422135 | -0.336377 | -0.413098 |
| C | -3.003990 | -0.944606 | 0.739227  |
| H | -2.751250 | -0.379447 | 1.643788  |
| H | -4.083061 | -0.943333 | 0.582617  |
| H | -2.653630 | -1.976341 | 0.854460  |
| O | 2.367588  | -0.217654 | 0.935492  |
| O | 1.197791  | 0.375043  | 1.324712  |
| O | 1.665470  | 0.935221  | -1.060167 |
| H | -1.265164 | 1.831190  | -0.105564 |

---

## TS16-2-2

---

|   |           |           |           |
|---|-----------|-----------|-----------|
| C | -1.380464 | -0.204404 | -0.141357 |
| C | -1.081324 | 1.092420  | 0.139038  |
| C | 0.090316  | 1.834953  | -0.326482 |
| C | 0.745256  | -1.405414 | -0.590601 |
| C | -0.534605 | -1.163115 | -0.864570 |
| H | -1.799855 | 1.693576  | 0.683232  |
| O | 1.045610  | 1.412931  | -0.954446 |
| H | 0.048449  | 2.912413  | -0.073803 |
| H | -1.021384 | -1.750437 | -1.636217 |
| H | 1.296246  | -2.104920 | -1.183897 |
| O | -2.558198 | -0.780425 | 0.163360  |
| C | -3.556043 | -0.005884 | 0.809320  |
| H | -4.409927 | -0.669625 | 0.933903  |
| H | -3.207002 | 0.336891  | 1.788634  |
| H | -3.837024 | 0.854187  | 0.192322  |
| C | 1.432968  | -0.678973 | 0.580269  |
| H | 1.009474  | 0.297227  | 0.692457  |
| O | 2.735128  | -0.571453 | 0.331834  |
| O | 1.248407  | -1.382951 | 1.717306  |

---

## IM16-2-1

---

|   |           |           |           |
|---|-----------|-----------|-----------|
| C | 0.000000  | 0.000000  | 0.000000  |
| C | 0.000000  | 0.000000  | 1.335115  |
| C | 1.120024  | 0.000000  | 2.288153  |
| C | 2.100770  | 0.917242  | 2.455375  |
| C | 2.320836  | 2.128380  | 1.648826  |
| C | 1.214120  | -0.030660 | -0.899609 |
| H | -0.944616 | 0.019750  | -0.534774 |
| H | -0.971220 | -0.050076 | 1.829642  |
| H | 3.044228  | 2.828560  | 2.105198  |
| H | 1.564270  | 1.010414  | -1.072565 |
| O | 1.060061  | -0.951860 | 3.276910  |
| C | 0.911984  | -2.298393 | 2.814620  |
| H | 1.709335  | -2.543445 | 2.106792  |
| H | 0.981857  | -2.928360 | 3.700690  |
| H | -0.060909 | -2.441723 | 2.335954  |
| O | 0.924833  | -0.532324 | -2.112658 |
| O | 2.258678  | -0.749894 | -0.237136 |
| O | 1.793823  | 2.371244  | 0.581493  |
| N | 3.488661  | -0.136910 | -0.440384 |
| O | 4.335255  | -0.715509 | 0.127768  |
| H | 2.787608  | 0.743940  | 3.257322  |

---

## IM16-2

---

|   |           |           |           |
|---|-----------|-----------|-----------|
| C | -1.202805 | -0.902914 | 0.840328  |
| C | 0.107567  | -0.846404 | 1.098071  |
| C | 1.151828  | -0.191646 | 0.299177  |
| C | 1.219010  | 1.096544  | -0.112559 |
| C | 0.243919  | 2.172809  | 0.173625  |
| C | -1.848777 | -0.368450 | -0.379003 |
| H | -1.881485 | -1.402160 | 1.526878  |
| H | 0.487784  | -1.354057 | 1.984581  |
| H | 0.672422  | 3.182801  | 0.035046  |
| H | -1.212011 | 0.078279  | -1.141203 |
| O | 2.309502  | -0.908104 | 0.096864  |
| C | 2.145924  | -2.252871 | -0.351894 |
| H | 1.586179  | -2.276160 | -1.292762 |
| H | 3.151007  | -2.643437 | -0.506534 |
| H | 1.627791  | -2.858973 | 0.396353  |
| O | -3.099280 | 0.203516  | -0.227016 |
| O | -2.923508 | -1.114146 | -0.859038 |
| O | -0.904472 | 2.011820  | 0.522299  |
| H | 2.091139  | 1.474709  | -0.603764 |

---

TS16-2-1-NO<sub>2</sub>

|   |           |           |           |
|---|-----------|-----------|-----------|
| C | 0.507351  | 1.114418  | 1.371167  |
| C | 0.104846  | -0.156299 | 1.554196  |
| C | -0.067200 | -1.074803 | 0.451102  |
| C | 0.870914  | -1.311671 | -0.569734 |
| C | 2.338458  | -1.054599 | -0.510699 |
| C | 0.822753  | 1.684240  | 0.016728  |
| H | 0.598063  | 1.805146  | 2.204745  |
| H | -0.235773 | -0.487397 | 2.532082  |
| H | 2.865404  | -1.430622 | -1.405916 |
| H | 0.827468  | 0.891901  | -0.782940 |
| O | 0.516754  | -2.016041 | -1.640303 |
| H | -0.444935 | -2.157437 | -1.646719 |
| O | -1.158596 | -1.816656 | 0.328391  |
| C | -2.325147 | -1.505131 | 1.110515  |
| H | -2.529745 | -0.434544 | 1.054032  |
| H | -3.134403 | -2.069247 | 0.652736  |
| H | -2.174610 | -1.830842 | 2.142355  |
| O | 1.555130  | 2.656910  | -0.079422 |
| O | -0.925811 | 2.111588  | -0.467034 |
| O | 2.907151  | -0.520767 | 0.408881  |
| N | -1.542749 | 1.021326  | -0.740336 |
| O | -2.705138 | 1.133319  | -1.063972 |

## TS16-1

---

|   |           |           |           |
|---|-----------|-----------|-----------|
| C | 0.520645  | -0.708267 | -0.325897 |
| C | -0.720291 | -0.914425 | -0.798926 |
| C | -1.985450 | -0.349471 | -0.327607 |
| C | -2.307730 | 0.949464  | -0.102803 |
| C | -1.442106 | 2.138179  | -0.305457 |
| C | 0.768619  | 0.036141  | 0.904458  |
| H | 1.399340  | -1.137788 | -0.792748 |
| H | -0.845168 | -1.598341 | -1.639143 |
| H | -2.023555 | 3.060885  | -0.484908 |
| H | -0.084108 | 0.344896  | 1.521053  |
| O | -3.064165 | -1.204199 | -0.319999 |
| C | -2.880570 | -2.428012 | 0.394082  |
| H | -2.643705 | -2.223801 | 1.443394  |
| H | -3.825909 | -2.964270 | 0.322107  |
| H | -2.082909 | -3.028856 | -0.052117 |
| O | 1.888539  | 0.277549  | 1.349314  |
| O | -0.232548 | 2.143370  | -0.284705 |
| O | 3.127522  | -0.195120 | 0.367047  |
| N | 4.666072  | -0.571049 | -0.653825 |
| O | 5.600369  | 0.002782  | -0.340043 |
| H | -3.316877 | 1.235046  | 0.109247  |

---

## TS16-2-1

|   |           |           |           |
|---|-----------|-----------|-----------|
| C | 0.687721  | -0.459952 | 1.261508  |
| C | -0.418682 | 0.276201  | 1.401691  |
| C | -1.422832 | 0.585974  | 0.374250  |
| C | -2.154608 | -0.268567 | -0.376992 |
| C | -2.111341 | -1.747923 | -0.331671 |
| C | 1.187025  | -1.042226 | -0.019434 |
| H | 1.342051  | -0.636838 | 2.112490  |
| H | -0.626207 | 0.736197  | 2.368349  |
| H | -3.011289 | -2.213927 | -0.775412 |
| H | 0.548157  | -0.859511 | -0.889736 |
| O | -1.824381 | 1.901737  | 0.287168  |
| C | -0.773872 | 2.861369  | 0.194557  |
| H | -0.137311 | 2.646250  | -0.670702 |
| H | -1.257220 | 3.829895  | 0.070545  |
| H | -0.163224 | 2.867866  | 1.101950  |
| O | 1.754961  | -2.283443 | 0.055167  |
| O | 2.541575  | -0.765902 | -0.246435 |
| O | -1.211362 | -2.414786 | 0.127270  |
| N | 2.850783  | 1.140359  | -0.559015 |
| O | 3.964245  | 1.290600  | -0.700456 |
| H | -2.935764 | 0.085061  | -1.017025 |

## TS17-2

|   |           |           |           |
|---|-----------|-----------|-----------|
| C | 1.184483  | -0.838448 | 0.163592  |
| C | 0.391227  | 0.382285  | 0.168807  |
| C | -0.951726 | 0.454998  | 0.058289  |
| C | -1.867445 | -0.644749 | -0.346059 |
| C | 3.396633  | 0.288351  | -0.216361 |
| C | 2.526217  | -0.874968 | 0.019418  |
| C | 0.641127  | -1.762010 | 0.340428  |
| H | 0.911808  | 1.326056  | 0.281647  |
| H | 2.914243  | 1.281989  | -0.300786 |
| H | 3.044834  | -1.828716 | 0.063946  |
| H | -1.676071 | 1.611011  | 0.087946  |
| O | -1.010765 | 2.823753  | 0.411521  |
| C | -0.284227 | 3.084125  | -0.365293 |
| H | -1.787212 | 3.584691  | 0.462561  |
| H | -0.512028 | 2.732410  | 1.381301  |
| H | 4.600669  | 0.197455  | -0.328526 |
| O | -1.311157 | -1.966158 | 1.144365  |
| O | -1.486524 | -1.841550 | -0.267722 |
| O | -2.850214 | -0.418414 | -0.703604 |

## P20

---

|   |           |           |           |
|---|-----------|-----------|-----------|
| C | 1.461291  | -1.488778 | -0.617415 |
| C | 2.472896  | -0.597900 | -0.600584 |
| C | 2.590335  | 0.601765  | 0.244122  |
| C | -0.537884 | 1.920916  | 0.166579  |
| C | -0.700876 | -0.392872 | -0.002969 |
| C | 0.142898  | -1.439603 | -0.005082 |
| H | 1.625985  | -2.425184 | -1.150189 |
| H | 3.362048  | -0.837644 | -1.177318 |
| O | -0.487975 | 3.003180  | -0.326763 |
| O | -0.438230 | 0.792375  | -0.618440 |
| O | 1.741690  | 1.028253  | 1.002706  |
| H | -0.687751 | 1.696263  | 1.230520  |
| H | 3.574952  | 1.103731  | 0.189722  |
| H | -0.188965 | -2.325940 | 0.494091  |
| O | -1.946268 | -0.532892 | 0.685720  |
| C | -1.698813 | -0.813505 | 2.065909  |
| H | -2.610798 | -0.720803 | 2.617806  |
| H | -1.321516 | -1.809839 | 2.165233  |
| H | -0.978965 | -0.119840 | 2.447418  |

---

## IM17-2-1

---

|   |           |           |           |
|---|-----------|-----------|-----------|
| C | -1.184853 | -0.352414 | -1.492429 |
| C | -0.221489 | 0.738549  | -1.262685 |
| C | 0.626883  | 0.843156  | -0.220553 |
| C | 0.756051  | -0.212617 | 0.905061  |
| C | -2.839269 | 0.286643  | 0.271322  |
| C | -2.306938 | -0.589233 | -0.797171 |
| H | -0.963300 | -0.993806 | -2.346368 |
| H | -0.126203 | 1.466551  | -2.066033 |
| H | -2.296944 | 1.229943  | 0.461214  |
| H | -2.935656 | -1.437902 | -1.052894 |
| O | 1.462077  | 1.867882  | 0.024294  |
| C | 1.308909  | 3.053883  | -0.744206 |
| H | 0.271047  | 3.400504  | -0.701637 |
| H | 1.973552  | 3.789755  | -0.295450 |
| H | 1.605236  | 2.877858  | -1.783154 |
| O | -3.851923 | 0.017246  | 0.877968  |
| O | 0.650981  | -1.543947 | 0.429297  |
| O | -0.183089 | -0.006347 | 1.781902  |
| N | 1.673536  | -1.819146 | -0.490549 |
| O | 1.601392  | -2.930141 | -0.849961 |
| H | 1.705957  | -0.091910 | 1.382563  |

---

## IM17-2

---

|   |           |           |           |
|---|-----------|-----------|-----------|
| C | -1.107958 | -0.861304 | 1.356893  |
| C | 0.191058  | -1.170966 | 0.713765  |
| C | 1.022475  | -0.300516 | 0.129963  |
| C | 0.788123  | 1.193750  | 0.029514  |
| C | -2.405861 | -0.535976 | -0.736911 |
| C | -2.258921 | -0.583511 | 0.732060  |
| H | -1.112503 | -0.929673 | 2.444260  |
| H | 0.507180  | -2.208639 | 0.789859  |
| H | -1.498386 | -0.756241 | -1.329551 |
| H | -3.165487 | -0.396365 | 1.300961  |
| O | 2.222585  | -0.606824 | -0.434955 |
| C | 2.633199  | -1.963320 | -0.439599 |
| H | 1.903888  | -2.581077 | -0.974529 |
| H | 3.590772  | -1.986608 | -0.956737 |
| H | 2.753870  | -2.331038 | 0.585051  |
| O | -3.461315 | -0.298762 | -1.282166 |
| O | 0.027237  | 1.771805  | 1.017125  |
| O | -0.463812 | 1.620185  | -0.376306 |
| H | 1.622059  | 1.766162  | -0.319479 |

---

## TS17-1

---

|   |           |           |           |
|---|-----------|-----------|-----------|
| C | -3.040473 | 1.203877  | 1.060585  |
| C | -2.562771 | -0.177991 | 1.140052  |
| C | -1.772539 | -0.718909 | 0.190745  |
| C | -1.178380 | 0.023474  | -0.922142 |
| C | -4.205714 | 0.955457  | -1.137583 |
| C | -3.726695 | 1.724234  | 0.025284  |
| H | -2.829789 | 1.837213  | 1.920036  |
| H | -2.866938 | -0.772333 | 1.997044  |
| H | -4.124950 | -0.146964 | -1.074139 |
| H | -3.998012 | 2.776206  | 0.027483  |
| O | -1.411115 | -2.022442 | 0.081855  |
| C | -1.993140 | -2.931741 | 0.999564  |
| H | -3.087129 | -2.870093 | 0.959726  |
| H | -1.662961 | -3.922586 | 0.692655  |
| H | -1.647851 | -2.728277 | 2.019158  |
| O | -4.707019 | 1.476855  | -2.112023 |
| O | -0.384041 | 2.397522  | 0.176004  |
| O | -0.655829 | 1.171373  | -0.860894 |
| H | -1.040241 | -0.459710 | -1.885828 |
| N | -0.063811 | 3.842212  | 1.397712  |
| O | 0.587852  | 4.718608  | 0.587240  |

---

## TS17-3

---

|   |           |           |           |
|---|-----------|-----------|-----------|
| C | 0.918349  | 2.022624  | -0.154108 |
| C | -0.415996 | 1.439250  | -0.228502 |
| C | -0.908259 | 0.185229  | -0.148269 |
| C | -0.259429 | -1.153575 | -0.128707 |
| C | 2.179620  | 0.012053  | 0.606165  |
| C | 2.073815  | 1.442895  | 0.202999  |
| H | 0.938503  | 3.080986  | -0.400249 |
| H | -1.187412 | 2.199177  | -0.311847 |
| H | 3.172099  | -0.449316 | 0.495650  |
| H | 2.987950  | 2.031886  | 0.190458  |
| O | -2.259085 | -0.079747 | -0.039326 |
| C | -3.164618 | 0.996109  | 0.128304  |
| H | -3.200701 | 1.618121  | -0.771830 |
| H | -4.139443 | 0.538524  | 0.290513  |
| H | -2.883674 | 1.605288  | 0.994131  |
| O | 1.563256  | -0.522683 | -1.231408 |
| O | 0.729582  | -1.540267 | -0.833260 |
| O | 1.336573  | -0.515843 | 1.352317  |
| H | -0.668302 | -1.870788 | 0.551975  |

---

## P22

---

|   |           |           |           |
|---|-----------|-----------|-----------|
| C | -0.435423 | -1.179379 | 1.078586  |
| C | -1.746962 | -1.324676 | 0.836532  |
| C | -2.436616 | -1.008282 | -0.439321 |
| C | -0.227633 | 1.724257  | 0.125641  |
| C | 0.664419  | 0.616196  | -0.357944 |
| C | 0.616278  | -0.649094 | 0.183594  |
| H | 1.512903  | 0.956770  | -0.938972 |
| O | -0.154973 | 2.936519  | -0.423579 |
| O | 0.681790  | 1.941484  | 1.112137  |
| O | -1.971061 | -0.321389 | -1.320162 |
| H | -1.233391 | 1.405521  | 0.435240  |
| H | -3.438418 | -1.464044 | -0.553136 |
| H | -0.038800 | -1.563822 | 2.016732  |
| H | 1.417119  | -1.312874 | -0.067304 |
| O | -2.554137 | -1.937101 | 1.845642  |
| C | -1.710295 | -2.536075 | 2.832587  |
| H | -1.200605 | -1.769902 | 3.378567  |
| H | -2.305435 | -3.117627 | 3.505272  |
| H | -0.993438 | -3.168879 | 2.352404  |

---



## TS18-2-1

---

|   |           |           |           |
|---|-----------|-----------|-----------|
| C | 0.124405  | 0.387892  | 1.734675  |
| C | -0.971964 | 0.949937  | 0.924409  |
| C | -1.838073 | 0.325665  | 0.107907  |
| C | -1.890669 | -1.162942 | -0.143371 |
| C | 1.465434  | -0.712644 | -0.085902 |
| C | 1.172949  | -0.331056 | 1.325604  |
| H | 0.080645  | 0.668269  | 2.786473  |
| H | -1.135489 | 2.012849  | 1.087738  |
| H | 0.754239  | -0.325530 | -0.823386 |
| H | 1.923035  | -0.661721 | 2.040532  |
| O | -2.861155 | 0.944755  | -0.554983 |
| C | -3.027539 | 2.341669  | -0.395864 |
| H | -2.132896 | 2.876494  | -0.732860 |
| H | -3.878150 | 2.616402  | -1.017359 |
| H | -3.236638 | 2.589310  | 0.650653  |
| O | 1.897833  | -1.993780 | -0.295460 |
| O | 2.805834  | -0.521804 | -0.446150 |
| O | -0.932017 | -1.895629 | 0.214018  |
| N | 3.308897  | 1.367243  | -0.475547 |
| O | 4.417647  | 1.420451  | -0.700844 |
| H | -2.743053 | -1.594383 | -0.625243 |

---

TS18-2-1-NO<sub>2</sub>

|   |           |           |           |
|---|-----------|-----------|-----------|
| C | 0.262000  | -0.418771 | 1.870609  |
| C | -0.743729 | 0.441028  | 1.242464  |
| C | -1.619762 | 0.187106  | 0.242952  |
| C | -1.825803 | -1.146273 | -0.439376 |
| C | 1.687295  | -1.013428 | -0.116688 |
| C | 1.316723  | -1.052154 | 1.332656  |
| H | 0.196106  | -0.450129 | 2.959250  |
| H | -0.830176 | 1.412553  | 1.724387  |
| H | 1.008850  | -0.415126 | -0.768023 |
| H | 1.988793  | -1.635636 | 1.952773  |
| O | -2.518975 | 1.100293  | -0.235403 |
| C | -2.494036 | 2.449147  | 0.241552  |
| H | -1.507756 | 2.895766  | 0.077743  |
| H | -3.245104 | 2.980765  | -0.341807 |
| H | -2.755841 | 2.489256  | 1.304706  |
| O | 2.221045  | -2.028641 | -0.612603 |
| O | 2.930581  | 0.339185  | -0.074177 |
| O | -1.035387 | -2.098546 | -0.211365 |
| N | 2.356505  | 1.273383  | -0.753263 |
| O | 2.932585  | 2.327018  | -0.879879 |
| H | -2.643699 | -1.280209 | -1.116138 |

## TS18-2

|   |           |           |           |
|---|-----------|-----------|-----------|
| C | -0.700366 | -1.070721 | 1.261024  |
| C | 0.575305  | -1.159120 | 0.530163  |
| C | 1.367291  | -0.173103 | 0.073154  |
| C | 1.096598  | 1.306693  | 0.218024  |
| C | -2.030605 | 0.098125  | -0.421483 |
| C | -1.872978 | -0.545035 | 0.862509  |
| H | -0.688617 | -1.582590 | 2.222455  |
| H | 0.961800  | -2.172971 | 0.452468  |
| H | -1.154765 | 0.226180  | -1.062727 |
| H | -2.755814 | -0.602799 | 1.486189  |
| O | 2.582159  | -0.364754 | -0.513692 |
| C | 3.052121  | -1.690819 | -0.694442 |
| H | 2.358779  | -2.261573 | -1.320953 |
| H | 4.014604  | -1.601157 | -1.194940 |
| H | 3.180678  | -2.188649 | 0.272647  |
| O | -3.118887 | 0.633110  | -0.831790 |
| O | -3.865242 | -0.616191 | -0.628377 |
| O | -0.062687 | 1.710080  | 0.495347  |
| H | 1.890673  | 2.011387  | 0.084788  |

## P21

---

|   |           |           |           |
|---|-----------|-----------|-----------|
| C | 1.036823  | -1.352775 | -1.014435 |
| C | -0.302537 | -1.236139 | -0.412363 |
| C | -1.001666 | -0.136194 | -0.083001 |
| C | -0.548754 | 1.290129  | -0.294189 |
| C | 2.360144  | -0.131900 | 0.708271  |
| C | 2.202096  | -0.871793 | -0.561373 |
| H | 1.058581  | -1.974065 | -1.909280 |
| H | -0.815287 | -2.189859 | -0.309845 |
| H | 1.455435  | -0.021200 | 1.332917  |
| H | 3.122051  | -1.059558 | -1.108253 |
| O | -2.272931 | -0.148797 | 0.413219  |
| C | -2.907737 | -1.396345 | 0.634233  |
| H | -2.329744 | -2.001088 | 1.341171  |
| H | -3.884194 | -1.165911 | 1.056840  |
| H | -3.029419 | -1.939436 | -0.309407 |
| O | 3.430362  | 0.293211  | 1.082517  |
| O | 0.659494  | 1.535914  | -0.545777 |
| H | -1.255456 | 2.090956  | -0.229785 |

---

## IM18-2-2

---

|   |           |           |           |
|---|-----------|-----------|-----------|
| C | 1.696818  | -1.555621 | -0.495793 |
| C | 2.549057  | -0.505339 | -0.463393 |
| C | 2.428244  | 0.706055  | 0.356985  |
| C | -0.841424 | 1.535265  | 0.005530  |
| C | -0.608859 | -0.793869 | 0.063703  |
| C | 0.373094  | -1.710475 | 0.076428  |
| H | 2.063947  | -2.448216 | -1.002921 |
| O | -0.913211 | 2.558009  | -0.599686 |
| O | -0.521785 | 0.363721  | -0.645404 |
| O | 1.474424  | 1.019896  | 1.046206  |
| H | -1.027270 | 1.400620  | 1.078445  |
| H | 3.331567  | 1.345889  | 0.360467  |
| H | 0.096482  | -2.685415 | 0.463427  |
| H | -1.494556 | -0.981755 | 0.633913  |
| O | 3.793778  | -0.636147 | -1.155100 |
| C | 4.872391  | -0.461689 | -0.232572 |
| H | 5.748336  | -0.944659 | -0.612522 |
| H | 5.067645  | 0.582642  | -0.105490 |
| H | 4.608267  | -0.892510 | 0.710578  |

---

## IM18-2-1

|   |           |           |           |
|---|-----------|-----------|-----------|
| C | 0.588355  | 2.140974  | 0.132745  |
| C | -0.691824 | 1.553966  | -0.289074 |
| C | -1.356035 | 0.483085  | 0.174924  |
| C | -0.921484 | -0.388756 | 1.320833  |
| C | 2.228647  | 0.178440  | 0.064377  |
| C | 1.808990  | 1.615044  | 0.267467  |
| H | 0.529353  | 3.218930  | 0.282251  |
| H | -1.192417 | 2.136425  | -1.058732 |
| H | 2.143577  | -0.363808 | 1.030490  |
| H | 2.629907  | 2.260798  | 0.562631  |
| O | -2.561382 | 0.054236  | -0.302741 |
| C | -3.090734 | 0.671129  | -1.463788 |
| H | -2.369823 | 0.611340  | -2.286094 |
| H | -3.992091 | 0.114889  | -1.715304 |
| H | -3.347200 | 1.717077  | -1.263591 |
| O | 3.521781  | 0.085973  | -0.297237 |
| O | 1.343017  | -0.440159 | -0.873264 |
| O | 0.182464  | -0.179285 | 1.887395  |
| N | 1.181623  | -1.783985 | -0.578863 |
| O | 0.422361  | -2.279740 | -1.325575 |
| H | -1.551002 | -1.187121 | 1.654329  |

## IM18-2

|   |           |           |           |
|---|-----------|-----------|-----------|
| C | -0.622073 | -1.380398 | 1.166977  |
| C | 0.670970  | -1.245017 | 0.473236  |
| C | 1.317228  | -0.134173 | 0.078916  |
| C | 0.840150  | 1.282113  | 0.296819  |
| C | -2.094925 | -0.196222 | -0.465641 |
| C | -1.821650 | -0.932847 | 0.786663  |
| H | -0.576361 | -1.989985 | 2.068189  |
| H | 1.197130  | -2.188288 | 0.346409  |
| H | -1.272134 | -0.043190 | -1.162102 |
| H | -2.702638 | -1.136810 | 1.389110  |
| O | 2.552743  | -0.121238 | -0.503122 |
| C | 3.211072  | -1.355001 | -0.732104 |
| H | 2.611457  | -1.993655 | -1.389364 |
| H | 4.153453  | -1.106980 | -1.217460 |
| H | 3.403898  | -1.870924 | 0.214915  |
| O | -3.024565 | 0.828245  | -0.404003 |
| O | -3.330543 | -0.455628 | -1.055877 |
| O | -0.361373 | 1.501754  | 0.599592  |
| H | 1.523789  | 2.098762  | 0.193754  |

## TS18-1

---

|   |           |           |           |
|---|-----------|-----------|-----------|
| C | 0.006367  | -1.397571 | -0.605812 |
| C | -1.404030 | -1.275933 | -0.206483 |
| C | -2.187130 | -0.184876 | -0.120623 |
| C | -1.768356 | 1.230395  | -0.452754 |
| C | 1.019775  | 0.104064  | 1.043835  |
| C | 1.094622  | -0.794280 | -0.100598 |
| H | 0.171136  | -2.142751 | -1.383427 |
| H | -1.891320 | -2.237307 | -0.061433 |
| H | 0.058135  | 0.241171  | 1.551451  |
| H | 2.089147  | -0.988809 | -0.483829 |
| O | -3.513540 | -0.212327 | 0.184023  |
| C | -4.125496 | -1.457421 | 0.480387  |
| H | -3.634748 | -1.931033 | 1.336948  |
| H | -5.161073 | -1.230150 | 0.726471  |
| H | -4.086899 | -2.122146 | -0.389216 |
| O | -0.547032 | 1.528170  | -0.509918 |
| O | 1.983678  | 0.689606  | 1.533305  |
| O | 3.413959  | 0.444671  | 0.754347  |
| N | 4.914326  | 0.071008  | -0.305157 |
| O | 4.753713  | -0.710559 | -1.125476 |
| H | -2.510640 | 1.978195  | -0.639058 |

---

## TS18-3

---

|   |           |           |           |
|---|-----------|-----------|-----------|
| C | -1.119539 | 1.888854  | -0.495135 |
| C | 0.273239  | 1.485353  | -0.282890 |
| C | 0.847741  | 0.256659  | -0.257718 |
| C | 0.154604  | -1.045325 | -0.586518 |
| C | -2.109182 | -0.127577 | 0.311413  |
| C | -2.259894 | 1.199978  | -0.253701 |
| H | -1.227769 | 2.892835  | -0.901572 |
| H | 0.942317  | 2.328928  | -0.144498 |
| H | -2.736814 | -0.994777 | 0.127557  |
| H | -3.229058 | 1.576119  | -0.557399 |
| O | 2.159384  | 0.035635  | -0.009700 |
| C | 2.959780  | 1.106034  | 0.462682  |
| H | 2.511014  | 1.548184  | 1.358186  |
| H | 3.928895  | 0.671588  | 0.702780  |
| H | 3.082850  | 1.869399  | -0.312921 |
| O | -1.273139 | -0.142993 | 1.293188  |
| O | -0.543946 | -1.311829 | 1.370833  |
| O | -0.978923 | -1.034184 | -1.132927 |
| H | 0.627651  | -1.976666 | -0.354720 |

---

CHOCHO

|   |              |              |              |
|---|--------------|--------------|--------------|
| C | -0.000048565 | -0.000004232 | -0.000000645 |
| C | 0.000049313  | -0.000007209 | 0.000000777  |
| H | 0.000004459  | 0.000021632  | 0.000000187  |
| O | 0.000009157  | -0.000019836 | 0.000000159  |
| O | -0.000004713 | -0.000005597 | -0.000000225 |
| H | -0.000009651 | 0.000015242  | -0.000000254 |

IMP1-1

|   |           |           |           |
|---|-----------|-----------|-----------|
| C | -0.109277 | -1.184758 | -1.217631 |
| C | 1.197457  | -0.983596 | -1.409487 |
| C | 2.176063  | -0.526379 | -0.390419 |
| C | -0.511176 | 1.494844  | -0.246077 |
| C | -1.063516 | 0.405239  | 0.656735  |
| C | -0.873375 | -1.046345 | 0.067546  |
| H | -0.724455 | -1.473379 | -2.067143 |
| H | 1.627195  | -1.107499 | -2.397388 |
| H | -0.582805 | 0.485623  | 1.633327  |
| O | 1.661724  | -0.495396 | 0.852182  |
| C | 2.495960  | 0.123109  | 1.838780  |
| H | 2.671005  | 1.164614  | 1.561374  |
| H | 1.941911  | 0.060314  | 2.774385  |
| H | 3.446326  | -0.407534 | 1.915790  |
| O | 0.560201  | 2.080776  | 0.057905  |
| O | 3.309907  | -0.206931 | -0.653050 |
| H | -0.461178 | -1.678986 | 0.858415  |
| O | -2.216621 | -1.421988 | -0.209906 |
| O | -2.469122 | 0.535683  | 0.746474  |
| O | -2.916887 | -0.814410 | 0.842899  |
| H | -1.033081 | 1.764159  | -1.140496 |

## IMP1-2

---

|   |           |           |           |
|---|-----------|-----------|-----------|
| C | 0.583359  | -1.265433 | 0.280194  |
| C | 0.972729  | -0.243120 | -0.857332 |
| C | 0.385531  | 1.139428  | -0.623191 |
| C | -2.471577 | -0.625612 | 0.018188  |
| C | -1.647380 | -0.501196 | 1.244083  |
| C | -0.342421 | -0.768550 | 1.353369  |
| H | 0.634860  | -0.608420 | -1.828701 |
| H | -2.199913 | -0.128078 | 2.099304  |
| H | 0.145771  | -0.599193 | 2.310875  |
| O | 0.976510  | 1.770070  | 0.386915  |
| C | 0.400319  | 3.035112  | 0.733299  |
| H | -0.637703 | 2.896282  | 1.045392  |
| H | 1.006611  | 3.417258  | 1.551717  |
| H | 0.432027  | 3.709214  | -0.124374 |
| O | -3.668063 | -0.235773 | 0.022180  |
| O | -0.552287 | 1.566283  | -1.250891 |
| H | 0.216224  | -2.180576 | -0.191506 |
| O | 2.383170  | -0.187036 | -0.769920 |
| O | 1.840597  | -1.503004 | 0.900991  |
| O | 2.726013  | -1.440721 | -0.187561 |
| H | -2.049117 | -1.046889 | -0.870042 |

---

## IMP6

---

|   |           |           |           |
|---|-----------|-----------|-----------|
| C | -1.485172 | 0.894325  | -0.000051 |
| C | -0.224494 | 1.348395  | -0.000085 |
| C | 1.057852  | 0.588904  | 0.000001  |
| C | -1.972256 | -0.513539 | 0.000082  |
| H | -2.296336 | 1.619807  | -0.000107 |
| H | -0.047360 | 2.419696  | -0.000149 |
| O | 0.920779  | -0.744719 | -0.000099 |
| C | 2.148950  | -1.483234 | -0.000027 |
| H | 2.731908  | -1.240189 | 0.890088  |
| H | 1.859375  | -2.532090 | -0.000120 |
| H | 2.732070  | -1.240084 | -0.890007 |
| O | 2.130056  | 1.146241  | 0.000139  |
| H | -1.232522 | -1.325690 | 0.000238  |
| O | -3.162886 | -0.740341 | 0.000027  |

---

IMP1-1-2

|   |           |           |           |
|---|-----------|-----------|-----------|
| C | -1.043651 | -0.116591 | -0.000094 |
| C | 0.373738  | -0.559097 | 0.000278  |
| H | 0.642502  | -1.611839 | 0.000762  |
| O | -1.969037 | -0.969369 | -0.000153 |
| O | 1.275355  | 0.312961  | -0.000026 |
| O | 2.542330  | -0.070924 | -0.000151 |
| H | -1.278189 | 0.927388  | -0.000312 |

IMP1-1-1

|   |           |           |           |
|---|-----------|-----------|-----------|
| C | 0.795646  | -1.315013 | -0.000179 |
| C | -0.537090 | -1.500497 | -0.000119 |
| C | -1.618074 | -0.480158 | 0.000052  |
| C | 1.503906  | -0.056351 | 0.000055  |
| H | 1.439810  | -2.190918 | -0.000355 |
| H | -0.927799 | -2.512408 | -0.000199 |
| O | -1.179048 | 0.787535  | -0.000216 |
| C | -2.204234 | 1.790171  | -0.000132 |
| H | -2.826400 | 1.687956  | 0.890738  |
| H | -1.679884 | 2.743564  | -0.000466 |
| H | -2.826873 | 1.687594  | -0.890631 |
| O | -2.788006 | -0.781653 | 0.000386  |
| H | 1.058285  | 0.933087  | 0.000416  |
| O | 2.763702  | -0.133274 | -0.000098 |
| O | 3.468594  | 1.005170  | 0.000233  |

P5

|   |           |           |           |
|---|-----------|-----------|-----------|
| C | 0.527813  | -0.102045 | 0.000037  |
| C | -0.934234 | -0.559940 | 0.000108  |
| H | -1.039986 | -1.659010 | 0.000417  |
| O | 1.453968  | -0.953989 | -0.000104 |
| O | -1.859149 | 0.202311  | -0.000125 |
| H | 0.761410  | 0.942145  | 0.000108  |



## P8

---

|   |           |           |           |
|---|-----------|-----------|-----------|
| C | 1.751959  | -0.344402 | -0.000351 |
| C | -1.448612 | -0.005096 | 0.000014  |
| C | -0.393993 | 1.044051  | 0.000211  |
| C | 0.938685  | 0.905266  | 0.000165  |
| H | -0.825348 | 2.040318  | 0.000418  |
| H | 1.551675  | 1.804260  | 0.000391  |
| O | -2.663282 | 0.323762  | -0.000465 |
| H | 1.234015  | -1.312699 | -0.001068 |
| O | 2.961477  | -0.273162 | -0.000034 |
| H | -1.174365 | -1.039353 | 0.000280  |

---

## IMP1-2-2

---

|   |           |           |           |
|---|-----------|-----------|-----------|
| C | 0.947633  | 0.598195  | 0.000019  |
| C | -0.537905 | 0.513924  | -0.000122 |
| H | 1.459657  | 1.557289  | 0.000058  |
| O | -0.992589 | -0.731297 | -0.000208 |
| C | -2.422284 | -0.857264 | 0.000134  |
| H | -2.837696 | -0.380668 | -0.889606 |
| H | -2.616921 | -1.926965 | -0.003184 |
| H | -2.836463 | -0.386602 | 0.893632  |
| O | -1.209176 | 1.517826  | 0.000035  |
| O | 1.619414  | -0.459119 | -0.000109 |
| O | 2.945695  | -0.376433 | 0.000146  |

---

## IMP1-2-1

---

|   |           |           |           |
|---|-----------|-----------|-----------|
| C | 1.209034  | 0.004734  | -0.000191 |
| C | -1.935995 | -0.115126 | 0.000012  |
| C | -1.053445 | 1.076729  | 0.000144  |
| C | 0.291538  | 1.120480  | 0.000028  |
| H | -1.613364 | 2.005257  | 0.000318  |
| H | 0.776257  | 2.094073  | 0.000143  |
| O | -3.186258 | 0.027752  | -0.000301 |
| H | 0.950223  | -1.049123 | -0.000602 |
| O | 2.434560  | 0.309438  | 0.000071  |
| O | 3.336469  | -0.675834 | -0.000071 |
| H | -1.509665 | -1.096524 | 0.000183  |

---

## TS1(2)

---

|   |           |           |           |
|---|-----------|-----------|-----------|
| C | 2.276365  | -1.125745 | -0.034053 |
| C | 1.217251  | -1.830531 | 0.699300  |
| C | -0.054527 | -1.420549 | 0.676241  |
| C | -0.486103 | -0.203948 | -0.096529 |
| C | 0.624080  | 0.502032  | -0.924307 |
| C | 2.012441  | -0.039909 | -0.766553 |
| H | 3.292483  | -1.500104 | 0.044032  |
| H | 1.494416  | -2.695054 | 1.295169  |
| H | -0.815879 | -1.918608 | 1.267872  |
| H | 0.312986  | 0.511334  | -1.973313 |
| H | 2.796308  | 0.492822  | -1.296534 |
| O | -1.550794 | -0.435399 | -0.960705 |
| C | -2.747168 | -0.919775 | -0.362309 |
| H | -3.023019 | -0.316827 | 0.508473  |
| H | -3.520521 | -0.825698 | -1.124170 |
| H | -2.652822 | -1.973417 | -0.079072 |
| O | -1.030238 | 1.187730  | 1.171836  |
| O | 0.487837  | 2.361846  | -0.320876 |
| O | 0.225948  | 1.692836  | 0.885595  |

---

## IM1(2)

---

|   |           |           |           |
|---|-----------|-----------|-----------|
| C | -2.133539 | 0.930405  | -0.239064 |
| C | -1.095506 | 1.792212  | 0.093869  |
| C | 0.236643  | 1.375072  | 0.025828  |
| C | 0.524023  | 0.071260  | -0.383290 |
| C | -0.516029 | -0.802776 | -0.720249 |
| C | -1.833128 | -0.372222 | -0.647316 |
| H | -3.163965 | 1.264560  | -0.182809 |
| H | -1.313449 | 2.807082  | 0.412619  |
| H | 1.027000  | 2.067090  | 0.290814  |
| H | -0.344126 | -1.126647 | -1.725464 |
| H | -2.632314 | -1.058304 | -0.910963 |
| O | 1.781553  | -0.438554 | -0.485411 |
| C | 2.862549  | 0.407531  | -0.155760 |
| H | 2.806438  | 0.733935  | 0.889777  |
| H | 3.765095  | -0.185138 | -0.302275 |
| H | 2.892990  | 1.286231  | -0.811341 |
| O | 0.382306  | 0.054852  | 1.039576  |
| O | -0.397771 | -1.947904 | 0.128043  |
| O | -0.679556 | -0.943106 | 1.129733  |

---

## TS1(3)

---

|   |           |           |           |
|---|-----------|-----------|-----------|
| C | -0.990004 | -1.637947 | -1.059594 |
| C | -1.736795 | -1.602352 | 0.154063  |
| C | -1.285601 | -0.890355 | 1.229514  |
| C | -0.123853 | -0.069020 | 1.092263  |
| C | 0.645070  | -0.128182 | -0.120250 |
| C | 0.203682  | -0.972523 | -1.170225 |
| H | -1.355783 | -2.236728 | -1.887637 |
| H | -2.660968 | -2.166597 | 0.226599  |
| H | -1.823777 | -0.860650 | 2.171502  |
| H | 0.801847  | -1.048340 | -2.071729 |
| O | 0.109679  | 1.728985  | -0.927321 |
| O | -1.175332 | 1.651511  | 0.742135  |
| O | -1.113607 | 1.729303  | -0.536610 |
| H | 0.170993  | 0.584838  | 1.886263  |
| O | 1.987169  | 0.363357  | -0.074842 |
| C | 2.832952  | -0.613815 | 0.537273  |
| H | 3.852443  | -0.296247 | 0.468794  |
| H | 2.562437  | -0.725178 | 1.566505  |
| H | 2.716836  | -1.551189 | 0.034535  |

---

## IM1(3)

---

|   |           |           |           |
|---|-----------|-----------|-----------|
| C | 0.738554  | 1.755294  | 1.033024  |
| C | 0.817946  | 0.443507  | 1.276852  |
| C | 0.240509  | -0.581146 | 0.346206  |
| C | -0.506587 | -0.028547 | -0.912835 |
| C | -0.514337 | 1.468503  | -1.056780 |
| C | 0.049551  | 2.278135  | -0.155608 |
| H | 1.171677  | 2.467096  | 1.729153  |
| H | 1.308221  | 0.061372  | 2.167512  |
| H | -1.057062 | 1.847169  | -1.918630 |
| H | -0.013428 | 3.355230  | -0.279690 |
| O | -0.766644 | -1.373410 | 0.981716  |
| O | -1.862700 | -0.479302 | -0.861099 |
| O | -1.936954 | -0.635939 | 0.686963  |
| H | -0.046631 | -0.445700 | -1.784227 |
| O | 1.235488  | -1.517557 | -0.075755 |
| C | 2.180324  | -0.860204 | -0.924325 |
| H | 3.136360  | -0.838783 | -0.444288 |
| H | 2.257904  | -1.390972 | -1.850158 |
| H | 1.853681  | 0.141009  | -1.113474 |

---

## TS7(2)

---

|   |           |           |           |
|---|-----------|-----------|-----------|
| C | 0.712891  | 2.095420  | 0.336088  |
| C | 1.289848  | 0.924558  | 0.607659  |
| C | 0.599103  | -0.402296 | 0.524494  |
| C | -0.698693 | -0.219629 | -0.887203 |
| C | -1.312239 | 1.147002  | -0.661585 |
| C | -0.667480 | 2.199148  | -0.151574 |
| H | 1.283852  | 3.009760  | 0.468017  |
| H | 2.329154  | 0.847750  | 0.920590  |
| H | -2.339296 | 1.245638  | -1.007926 |
| H | -1.157200 | 3.167151  | -0.100790 |
| O | 0.059880  | -0.924901 | 1.648162  |
| O | 1.280468  | -1.362986 | -0.101574 |
| C | 2.282143  | -0.772097 | -0.933678 |
| H | 3.179073  | -0.631865 | -0.367329 |
| H | 2.481765  | -1.416700 | -1.764062 |
| H | 1.935095  | 0.174409  | -1.292266 |
| O | -1.523717 | -1.312315 | -0.474563 |
| H | -0.178490 | -0.342382 | -1.662400 |
| O | -2.412554 | -0.885598 | 0.403094  |

---

## IM7(2)

---

|   |           |           |           |
|---|-----------|-----------|-----------|
| C | -0.177331 | 2.288168  | 0.128186  |
| C | 1.001790  | 1.653938  | 0.255030  |
| C | 1.397354  | 0.273069  | -0.153584 |
| C | -1.497457 | -0.326383 | 0.761010  |
| C | -2.046962 | 0.630321  | -0.165130 |
| C | -1.459204 | 1.816095  | -0.406283 |
| H | -0.187232 | 3.332264  | 0.440500  |
| H | 1.831250  | 2.189140  | 0.706996  |
| H | -2.961568 | 0.326067  | -0.664349 |
| H | -1.985522 | 2.526183  | -1.040995 |
| O | 2.565826  | -0.133772 | 0.344107  |
| C | 3.043955  | -1.412131 | -0.104799 |
| H | 2.979944  | -1.470901 | -1.192981 |
| H | 4.082713  | -1.455352 | 0.217850  |
| H | 2.442681  | -2.207628 | 0.339837  |
| O | -1.723862 | -1.561560 | 0.672433  |
| O | -2.401649 | -1.998649 | -0.426433 |
| O | 0.698169  | -0.396930 | -0.878901 |
| H | -0.883013 | -0.050956 | 1.616918  |

---

## TS8(2)

---

|   |           |           |           |
|---|-----------|-----------|-----------|
| C | -2.494944 | 0.068349  | -0.423260 |
| C | -1.606690 | 0.932216  | -1.211289 |
| C | -0.275744 | 0.847449  | -1.125099 |
| C | 0.406456  | 0.159035  | 0.025613  |
| C | -0.506546 | -1.243196 | 0.175858  |
| C | -2.008406 | -0.850799 | 0.415621  |
| H | -3.567318 | 0.203356  | -0.525850 |
| H | -2.058771 | 1.675654  | -1.861053 |
| H | 0.366112  | 1.328981  | -1.855787 |
| H | -0.602763 | -2.327909 | 0.069046  |
| H | -2.568211 | -1.179207 | 1.286194  |
| O | 1.331524  | -0.803508 | -0.363742 |
| C | 2.397620  | -0.348008 | -1.188367 |
| H | 2.861806  | 0.550499  | -0.769895 |
| H | 3.128369  | -1.156164 | -1.203854 |
| H | 2.056508  | -0.156836 | -2.211296 |
| O | 1.102202  | 1.151718  | 0.814733  |
| O | 0.284329  | -1.870299 | 1.189478  |
| O | 0.396169  | 1.981008  | 1.741785  |

---

## IM8(2)

---

|   |           |           |           |
|---|-----------|-----------|-----------|
| C | 1.421569  | -0.647107 | 1.206071  |
| C | 0.118903  | -0.491745 | 1.472878  |
| C | -0.884044 | -0.382461 | 0.413063  |
| C | 1.140911  | 1.655431  | -0.717341 |
| C | 1.844634  | 0.395156  | -1.016204 |
| C | 1.983769  | -0.625993 | -0.152204 |
| H | 2.111766  | -0.782329 | 2.037026  |
| H | -0.260203 | -0.407263 | 2.486234  |
| H | 2.250156  | 0.316180  | -2.020715 |
| H | 2.556975  | -1.502160 | -0.444605 |
| O | -1.810952 | 0.532849  | 0.593139  |
| C | -2.808294 | 0.679364  | -0.435954 |
| H | -3.341471 | -0.262479 | -0.574641 |
| H | -3.472487 | 1.459656  | -0.073498 |
| H | -2.325247 | 0.978429  | -1.368177 |
| O | 0.913717  | 2.027878  | 0.416329  |
| O | -0.036738 | -2.144155 | -0.783931 |
| O | -0.969669 | -1.111375 | -0.611029 |
| H | 0.804962  | 2.262517  | -1.579548 |

---

## TS2(2)

|   |           |           |           |
|---|-----------|-----------|-----------|
| C | -2.184796 | -0.724544 | -0.801834 |
| C | -1.287452 | 0.122128  | -1.315593 |
| C | -0.057157 | 0.537889  | -0.556054 |
| C | 0.067461  | -0.020262 | 0.889372  |
| C | -0.988833 | -0.994574 | 1.315565  |
| C | -2.033972 | -1.299325 | 0.540971  |
| H | -3.043574 | -1.025206 | -1.394610 |
| H | -1.383715 | 0.494511  | -2.330390 |
| H | -0.865907 | -1.430640 | 2.302429  |
| H | -2.789510 | -1.996704 | 0.889636  |
| O | 0.114806  | 1.915502  | -0.474835 |
| C | 0.008863  | 2.482942  | 0.825525  |
| H | 0.894662  | 2.261900  | 1.430291  |
| H | -0.057999 | 3.560180  | 0.675801  |
| H | -0.894336 | 2.132422  | 1.334757  |
| O | 1.980766  | -0.885827 | 0.881438  |
| O | 2.047017  | -1.417213 | -0.424759 |
| O | 1.715275  | -0.293679 | -1.216022 |
| H | 0.132789  | 0.827760  | 1.577804  |

## IM2(2)

|   |           |           |           |
|---|-----------|-----------|-----------|
| C | 1.993688  | -0.964026 | -0.642964 |
| C | 0.771089  | -0.985776 | -1.182231 |
| C | -0.400861 | -0.305118 | -0.529071 |
| C | -0.116938 | 0.361115  | 0.846371  |
| C | 1.309705  | 0.347695  | 1.305928  |
| C | 2.273154  | -0.281217 | 0.626650  |
| H | 2.820415  | -1.440120 | -1.161746 |
| H | 0.591810  | -1.446183 | -2.148478 |
| H | 1.516397  | 0.867531  | 2.236634  |
| H | 3.293090  | -0.284716 | 0.998752  |
| O | -1.507270 | -1.130312 | -0.359077 |
| C | -1.863844 | -1.428432 | 0.985589  |
| H | -2.336819 | -0.569077 | 1.472461  |
| H | -2.584142 | -2.244078 | 0.928815  |
| H | -0.991679 | -1.756241 | 1.559887  |
| O | -0.606541 | 1.691230  | 0.654769  |
| O | -0.247872 | 1.935467  | -0.688592 |
| O | -0.803697 | 0.815980  | -1.349111 |
| H | -0.781991 | -0.091478 | 1.588133  |

## TS2(3)

---

|   |           |           |           |
|---|-----------|-----------|-----------|
| C | -0.583005 | 2.214016  | 0.016061  |
| C | 0.069945  | 1.646760  | -1.003470 |
| C | 0.358458  | 0.178766  | -1.032510 |
| C | -0.255417 | -0.669894 | 0.127674  |
| C | -0.932733 | 0.105641  | 1.218471  |
| C | -1.073291 | 1.432132  | 1.156389  |
| H | -0.771108 | 3.283350  | 0.010314  |
| H | 0.421212  | 2.232020  | -1.847319 |
| H | 0.049744  | -0.266408 | -1.986002 |
| H | -1.302988 | -0.483437 | 2.051191  |
| H | -1.570486 | 1.959882  | 1.964271  |
| O | -1.177279 | -1.613376 | -0.327325 |
| C | -2.497585 | -1.152794 | -0.589629 |
| H | -2.492968 | -0.379287 | -1.361842 |
| H | -3.047137 | -2.025472 | -0.941573 |
| H | -2.982688 | -0.756802 | 0.309737  |
| O | 2.407612  | -0.075657 | -0.782238 |
| O | 1.539916  | -1.347320 | 0.791106  |
| O | 2.377026  | -0.225100 | 0.623870  |

---

## IM2(3)

---

|   |           |           |           |
|---|-----------|-----------|-----------|
| C | 0.573303  | 2.150389  | -0.069032 |
| C | 0.980549  | 1.294994  | -1.012438 |
| C | 0.617613  | -0.155980 | -0.967248 |
| C | -0.365478 | -0.588035 | 0.168514  |
| C | -0.710172 | 0.470633  | 1.173729  |
| C | -0.268605 | 1.725229  | 1.054578  |
| H | 0.859159  | 3.196248  | -0.126972 |
| H | 1.595976  | 1.620513  | -1.845076 |
| H | 0.204693  | -0.490664 | -1.926474 |
| H | -1.343723 | 0.148949  | 1.993884  |
| H | -0.539741 | 2.465270  | 1.801050  |
| O | -1.573191 | -1.081705 | -0.326189 |
| C | -2.553960 | -0.125060 | -0.709683 |
| H | -2.175534 | 0.521708  | -1.505378 |
| H | -3.401341 | -0.705141 | -1.074226 |
| H | -2.875603 | 0.496748  | 0.133463  |
| O | 1.805711  | -0.897957 | -0.676304 |
| O | 0.389300  | -1.578212 | 0.865276  |
| O | 1.632756  | -0.927958 | 0.727119  |

---

## TS9(2)

---

|   |           |           |           |
|---|-----------|-----------|-----------|
| C | -0.529783 | 1.385636  | 0.705523  |
| C | -0.594027 | -0.126391 | 0.578743  |
| C | 0.433485  | -0.445667 | -0.968062 |
| C | 1.695814  | 0.338343  | -0.799369 |
| C | 1.721480  | 1.543499  | -0.230252 |
| C | 0.514647  | 2.140558  | 0.355470  |
| H | -1.410784 | 1.839178  | 1.153974  |
| H | 2.658727  | 2.088151  | -0.163996 |
| H | 0.502368  | 3.211301  | 0.536808  |
| O | 0.529303  | -1.740745 | -0.613341 |
| O | 1.116671  | -1.825876 | 0.559152  |
| O | -0.030990 | -0.844018 | 1.473103  |
| H | 2.593854  | -0.164135 | -1.151272 |
| H | -0.162385 | -0.347868 | -1.851393 |
| O | -1.835082 | -0.592194 | 0.042358  |
| C | -2.384406 | 0.403872  | -0.824242 |
| H | -2.015710 | 0.254993  | -1.817619 |
| H | -3.451640 | 0.326992  | -0.824650 |
| H | -2.096900 | 1.374940  | -0.478892 |

---

## IM9(2)

---

|   |           |           |           |
|---|-----------|-----------|-----------|
| C | -1.949883 | -0.737618 | -0.723694 |
| C | -1.391351 | 0.493242  | -1.212444 |
| C | 1.379236  | -0.752262 | -0.154518 |
| C | 0.702750  | -0.485545 | 1.156805  |
| C | -0.582030 | -0.778457 | 1.398511  |
| C | -1.585173 | -1.287975 | 0.450916  |
| H | -2.712274 | -1.186001 | -1.349604 |
| H | -0.949178 | 0.605164  | -2.198701 |
| H | -0.939390 | -0.658888 | 2.421141  |
| H | -2.122212 | -2.174965 | 0.782344  |
| O | 2.328982  | 0.122504  | -0.545722 |
| C | 2.575050  | 1.316160  | 0.191315  |
| H | 3.111664  | 1.102900  | 1.120836  |
| H | 3.202567  | 1.932078  | -0.450919 |
| H | 1.646942  | 1.852614  | 0.411761  |
| O | 1.131976  | -1.706919 | -0.841454 |
| O | -1.825583 | 1.543296  | 0.734544  |
| O | -1.315645 | 1.543644  | -0.515663 |
| H | 1.312445  | -0.098376 | 1.968157  |

---



## TS10(2)

---

|   |           |           |           |
|---|-----------|-----------|-----------|
| C | 0.176933  | 0.216437  | 1.382713  |
| C | -0.370567 | 0.692750  | 0.082503  |
| C | -0.425387 | -0.766279 | -1.046022 |
| C | 0.981061  | -1.345923 | -0.899535 |
| C | 1.678064  | -1.331603 | 0.237466  |
| C | 1.169273  | -0.671618 | 1.448863  |
| H | -0.261702 | 0.670292  | 2.268701  |
| H | 2.629684  | -1.851863 | 0.291113  |
| H | 1.597729  | -0.942704 | 2.408289  |
| O | -1.413091 | -1.383525 | -0.569557 |
| O | -2.323381 | -0.087604 | 0.544535  |
| O | -1.688685 | 0.925574  | 0.024465  |
| H | 1.338209  | -1.862958 | -1.786521 |
| H | -0.570279 | 0.164394  | -1.553717 |
| O | 0.335632  | 1.758187  | -0.558610 |
| C | 1.741589  | 1.505375  | -0.493262 |
| H | 2.005805  | 0.768707  | -1.222926 |
| H | 2.276355  | 2.410866  | -0.690774 |
| H | 1.994615  | 1.147385  | 0.482813  |

---

## IM10(2)

---

|   |           |           |           |
|---|-----------|-----------|-----------|
| C | -2.088987 | -0.769467 | 0.467354  |
| C | -2.115121 | 0.342436  | -0.267859 |
| C | -1.095758 | 1.437494  | -0.188275 |
| C | 0.861217  | -0.236671 | -0.253248 |
| C | 0.338056  | -0.881827 | 1.013677  |
| C | -0.924882 | -1.268918 | 1.208573  |
| H | -2.983841 | -1.381281 | 0.533221  |
| H | -2.900891 | 0.540389  | -0.994056 |
| H | 1.095996  | -1.074695 | 1.770550  |
| H | -1.155727 | -2.021252 | 1.956998  |
| O | 1.148015  | -1.003374 | -1.233960 |
| O | -0.594994 | 1.940784  | -1.278833 |
| O | 0.765105  | -2.235597 | -0.955741 |
| O | 1.715005  | 0.889143  | -0.033041 |
| C | 1.476323  | 1.420135  | 1.273090  |
| H | 2.340328  | 1.264430  | 1.884769  |
| H | 1.274889  | 2.468498  | 1.200571  |
| H | 0.635159  | 0.924793  | 1.711243  |
| H | -1.276043 | 2.292380  | 0.429438  |

---

## TS3(2)

---

|   |           |           |           |
|---|-----------|-----------|-----------|
| C | -1.387132 | 0.314228  | 0.901109  |
| C | 0.103756  | -0.144945 | 0.788714  |
| C | 1.010831  | 0.762260  | -0.005171 |
| C | 0.570165  | 1.880662  | -0.598309 |
| C | -0.819308 | 2.310513  | -0.457309 |
| C | -1.725679 | 1.612106  | 0.235059  |
| H | -1.106095 | 3.244235  | -0.932207 |
| H | -2.748396 | 1.957020  | 0.347050  |
| O | 2.332016  | 0.459943  | -0.047300 |
| C | 2.743742  | -0.879814 | 0.183556  |
| H | 2.322106  | -1.557505 | -0.568633 |
| H | 3.828588  | -0.872253 | 0.086534  |
| H | 2.474150  | -1.216612 | 1.189197  |
| H | 1.273414  | 2.489730  | -1.155486 |
| H | 0.501542  | -0.231071 | 1.778284  |
| H | -1.631303 | 0.399732  | 1.939362  |
| O | -2.124036 | -1.412350 | 0.005396  |
| O | -0.028464 | -2.072173 | -0.124244 |
| O | -1.166048 | -1.893338 | -0.955101 |

---

## IM3(2)

---

|   |           |           |           |
|---|-----------|-----------|-----------|
| C | -1.410665 | -0.274987 | 0.744957  |
| C | 0.144725  | -0.409051 | 0.650038  |
| C | 0.868393  | 0.768845  | 0.045949  |
| C | 0.224909  | 1.855395  | -0.403674 |
| C | -1.225974 | 1.976687  | -0.279120 |
| C | -1.988788 | 1.016583  | 0.254708  |
| H | -1.684310 | 2.896708  | -0.629976 |
| H | -3.062700 | 1.132241  | 0.358594  |
| O | 2.224070  | 0.742619  | 0.033653  |
| C | 2.893228  | -0.509020 | 0.091906  |
| H | 2.636889  | -1.134238 | -0.771935 |
| H | 3.956044  | -0.273312 | 0.056885  |
| H | 2.672496  | -1.041037 | 1.022316  |
| H | 0.803639  | 2.668433  | -0.827948 |
| H | 0.526794  | -0.564397 | 1.637354  |
| H | -1.693040 | -0.397915 | 1.769677  |
| O | -1.873598 | -1.377901 | -0.038736 |
| O | 0.314853  | -1.584606 | -0.146220 |
| O | -0.814171 | -1.509261 | -1.004141 |

---

## TS11(2)

---

|   |           |           |           |
|---|-----------|-----------|-----------|
| C | 0.203696  | -0.745655 | -0.112020 |
| C | -1.206814 | -0.035031 | 0.932033  |
| C | -1.565679 | 1.300684  | 0.339654  |
| C | -0.638487 | 2.133974  | -0.142259 |
| C | 0.760076  | 1.723075  | -0.246336 |
| C | 1.143129  | 0.443385  | -0.206026 |
| H | 0.546736  | -1.508758 | 0.608139  |
| H | -0.873916 | -0.061092 | 1.971120  |
| H | 1.507349  | 2.501064  | -0.374145 |
| O | -2.040856 | -1.039047 | 0.680492  |
| O | -2.346571 | -1.062573 | -0.587482 |
| O | -0.398956 | -1.171340 | -1.152142 |
| H | -0.949691 | 3.114354  | -0.486199 |
| H | -2.594512 | 1.592343  | 0.303081  |
| O | 2.527262  | 0.094425  | -0.291478 |
| C | 3.093118  | -0.929559 | 0.530814  |
| H | 4.073107  | -1.171264 | 0.175708  |
| H | 3.155405  | -0.582090 | 1.540906  |
| H | 2.474244  | -1.801522 | 0.491110  |

---

## IM11(2)

---

|   |           |           |           |
|---|-----------|-----------|-----------|
| C | -0.734755 | 1.139471  | -0.422857 |
| C | 1.932711  | -0.188878 | 0.633493  |
| C | 1.710060  | -1.313515 | -0.281217 |
| C | 0.460479  | -1.832257 | -0.412456 |
| C | -0.790346 | -1.330798 | 0.121405  |
| C | -1.287244 | -0.072707 | 0.208370  |
| H | 0.201993  | 0.969567  | -0.987999 |
| H | 1.237329  | -0.037679 | 1.455400  |
| H | -1.463164 | -2.122970 | 0.450436  |
| O | 2.849436  | 0.669806  | 0.599165  |
| O | 3.720826  | 0.694611  | -0.428229 |
| O | -1.192320 | 2.260530  | -0.335110 |
| H | 0.411001  | -2.783290 | -0.937188 |
| H | 2.525061  | -1.722565 | -0.840997 |
| O | -2.599763 | 0.080369  | 0.754961  |
| C | -3.572779 | -0.235257 | -0.244297 |
| H | -3.637001 | -1.297399 | -0.356685 |
| H | -4.525986 | 0.150367  | 0.051661  |
| H | -3.283413 | 0.205091  | -1.175565 |

---

## TS12(2)

|   |           |           |           |
|---|-----------|-----------|-----------|
| C | 0.173767  | -0.239448 | 0.806059  |
| C | -1.450655 | -0.980194 | 0.306458  |
| C | -2.356646 | 0.256358  | 0.303581  |
| C | -1.969824 | 1.505184  | 0.010191  |
| C | -0.584722 | 1.791072  | -0.351839 |
| C | 0.402973  | 0.939794  | -0.060852 |
| H | 0.118674  | -0.082623 | 1.885458  |
| H | -1.641785 | -1.604159 | 1.198193  |
| H | -0.376373 | 2.688279  | -0.926283 |
| O | -1.192490 | -1.584289 | -0.786805 |
| O | 0.842539  | -1.571854 | -0.757487 |
| O | 0.876615  | -1.338828 | 0.528608  |
| H | -2.718452 | 2.289516  | -0.017451 |
| H | -3.385677 | 0.109689  | 0.557518  |
| O | 1.731116  | 1.081806  | -0.571508 |
| C | 2.661742  | 0.520861  | 0.358103  |
| H | 2.919855  | -0.470775 | 0.049987  |
| H | 3.543803  | 1.125783  | 0.388751  |
| H | 2.217911  | 0.487848  | 1.331151  |

## TS4(2)

|   |           |           |           |
|---|-----------|-----------|-----------|
| C | -0.594042 | -0.535394 | 1.065309  |
| C | 0.830616  | -0.697646 | 0.632217  |
| C | 1.491269  | 0.284544  | -0.001405 |
| C | 0.870437  | 1.584756  | -0.293529 |
| C | -0.383567 | 1.851336  | 0.069478  |
| C | -1.247131 | 0.856369  | 0.789577  |
| H | 1.280437  | -1.661710 | 0.835459  |
| H | -0.846529 | 2.804491  | -0.167594 |
| H | -1.658560 | 1.289240  | 1.706070  |
| H | -0.716600 | -0.822008 | 2.113717  |
| O | -2.927203 | 0.358979  | -0.367990 |
| O | -2.006241 | -1.588760 | -0.008980 |
| O | -2.478106 | -0.784847 | -1.069523 |
| H | 1.482069  | 2.305934  | -0.826628 |
| O | 2.767620  | 0.232072  | -0.445727 |
| C | 3.470301  | -0.979419 | -0.247218 |
| H | 2.968750  | -1.806369 | -0.762646 |
| H | 4.462768  | -0.827456 | -0.668820 |
| H | 3.551812  | -1.208946 | 0.821633  |

## IM4(2)

---

|   |           |           |           |
|---|-----------|-----------|-----------|
| C | -0.713095 | -0.685345 | 0.822646  |
| C | 0.734565  | -0.659914 | 0.439066  |
| C | 1.324885  | 0.458078  | -0.012821 |
| C | 0.589668  | 1.720473  | -0.178104 |
| C | -0.708913 | 1.808706  | 0.106942  |
| C | -1.507441 | 0.643435  | 0.615596  |
| H | 1.277184  | -1.587161 | 0.576415  |
| H | -1.243764 | 2.748217  | 0.005503  |
| H | -1.942386 | 0.921222  | 1.552909  |
| H | -0.776987 | -0.951626 | 1.857011  |
| O | -2.518389 | 0.254286  | -0.317918 |
| O | -1.444682 | -1.614245 | 0.013708  |
| O | -2.021027 | -0.858034 | -1.027479 |
| H | 1.107978  | 2.586027  | -0.534571 |
| O | 2.715363  | 0.419685  | -0.344480 |
| C | 3.225359  | -0.895420 | -0.109315 |
| H | 2.748696  | -1.586689 | -0.772519 |
| H | 4.281147  | -0.904849 | -0.282872 |
| H | 3.027838  | -1.178752 | 0.903409  |

---

## TS13(2)

---

|   |           |           |           |
|---|-----------|-----------|-----------|
| C | -0.888246 | -0.551813 | 1.155344  |
| C | 0.515441  | -0.674514 | 0.587135  |
| C | 1.232716  | 0.361375  | 0.126111  |
| C | 0.689151  | 1.726623  | 0.082873  |
| C | -0.621740 | 1.939015  | 0.156000  |
| C | -1.615464 | 0.833083  | 0.130679  |
| H | 0.925166  | -1.677339 | 0.636589  |
| H | -1.047167 | 2.937335  | 0.233063  |
| O | 2.512499  | 0.318346  | -0.313946 |
| C | 3.170667  | -0.932691 | -0.260849 |
| H | 2.659782  | -1.667644 | -0.893903 |
| H | 4.178402  | -0.761019 | -0.636010 |
| H | 3.213622  | -1.303167 | 0.769767  |
| H | 1.401829  | 2.543202  | 0.032666  |
| O | -1.836140 | -1.341244 | 0.432022  |
| H | -1.023153 | -0.484685 | 2.084809  |
| O | -2.064066 | 0.355841  | -1.140500 |
| H | -2.360207 | 0.915985  | 0.752433  |
| O | -1.467721 | -1.421585 | -0.832973 |

---

## IM13(2)

---

|   |           |           |           |
|---|-----------|-----------|-----------|
| C | 0.240589  | 1.517546  | -1.017005 |
| C | 1.004790  | 0.328975  | -0.836240 |
| C | 0.708359  | -0.576906 | 0.129774  |
| C | -0.379690 | -0.489094 | 1.130322  |
| C | -1.704912 | -0.401446 | 0.938445  |
| C | -2.425727 | -0.445061 | -0.361573 |
| H | -0.402482 | 1.701917  | -1.872152 |
| H | 1.852888  | 0.227870  | -1.500656 |
| H | -2.344048 | -0.417043 | 1.818329  |
| H | -1.939799 | 0.134017  | -1.170170 |
| O | 1.451819  | -1.660562 | 0.393429  |
| C | 2.610296  | -1.892922 | -0.402991 |
| H | 3.316683  | -1.063811 | -0.296840 |
| H | 3.048344  | -2.813324 | -0.022142 |
| H | 2.332689  | -2.013496 | -1.454091 |
| O | 0.227861  | 2.449606  | -0.166241 |
| O | 1.011537  | 2.318298  | 0.948787  |
| O | -3.462073 | -1.033404 | -0.568419 |
| H | -0.019657 | -0.594187 | 2.152888  |

---

## TS14(2)

---

|   |           |           |           |
|---|-----------|-----------|-----------|
| C | -0.541390 | -0.960030 | 1.033039  |
| C | 0.840392  | -0.867115 | 0.408299  |
| C | 1.449252  | 0.287825  | 0.099274  |
| C | 0.794897  | 1.589543  | 0.295704  |
| C | -0.524265 | 1.671791  | 0.443833  |
| C | -1.424735 | 0.501169  | 0.270593  |
| H | 1.332253  | -1.825175 | 0.281131  |
| H | -1.025651 | 2.603899  | 0.695536  |
| O | 2.706995  | 0.427814  | -0.382214 |
| C | 3.466599  | -0.753116 | -0.553989 |
| H | 2.989072  | -1.419830 | -1.281571 |
| H | 4.438937  | -0.436193 | -0.927973 |
| H | 3.586309  | -1.277750 | 0.400838  |
| H | 1.435684  | 2.463012  | 0.356332  |
| O | -1.498531 | -1.544711 | 0.145948  |
| H | -0.639660 | -1.164058 | 1.947001  |
| O | -2.238804 | 0.441958  | -0.903581 |
| O | -3.288371 | -0.324878 | -0.673861 |
| H | -1.931747 | 0.234236  | 1.057853  |

---

## TS5(2)

---

|   |           |           |           |
|---|-----------|-----------|-----------|
| C | -0.397341 | -1.069219 | 0.723002  |
| C | -1.414490 | -0.361980 | 0.227862  |
| C | -1.288134 | 1.084541  | -0.018537 |
| C | -0.148647 | 1.745505  | 0.205839  |
| C | 1.074771  | 1.069280  | 0.744021  |
| C | 0.926587  | -0.451290 | 1.073600  |
| H | -0.470019 | -2.144584 | 0.856837  |
| H | 1.466853  | 1.617316  | 1.605591  |
| H | 1.194425  | -0.661060 | 2.113166  |
| O | 2.473510  | -1.322245 | -0.066824 |
| O | 2.534453  | -0.463699 | -1.189732 |
| O | 2.654777  | 0.798514  | -0.566625 |
| H | -0.081093 | 2.802674  | -0.028864 |
| H | -2.135330 | 1.623098  | -0.388829 |
| O | -2.639244 | -0.999210 | -0.144718 |
| C | -3.554904 | -0.019800 | -0.641933 |
| H | -3.162519 | 0.412606  | -1.538571 |
| H | -4.495297 | -0.484952 | -0.852158 |
| H | -3.692040 | 0.745792  | 0.092889  |

---

## IM5(2)

---

|   |           |           |           |
|---|-----------|-----------|-----------|
| C | 0.282963  | -1.203538 | -0.489014 |
| C | 1.283447  | -0.373420 | -0.189216 |
| C | 1.069598  | 1.081837  | -0.114388 |
| C | -0.132575 | 1.632970  | -0.305907 |
| C | -1.344123 | 0.814623  | -0.631684 |
| C | -1.110409 | -0.723441 | -0.781525 |
| H | 0.425262  | -2.280260 | -0.493830 |
| H | -1.852675 | 1.218068  | -1.512014 |
| H | -1.453676 | -1.085095 | -1.755081 |
| O | -2.039022 | -1.273983 | 0.160983  |
| O | -2.064320 | -0.280678 | 1.168179  |
| O | -2.336153 | 0.878093  | 0.407076  |
| H | -0.259341 | 2.705312  | -0.199744 |
| H | 1.902991  | 1.717738  | 0.100058  |
| O | 2.581783  | -0.876078 | 0.137214  |
| C | 3.460882  | 0.217033  | 0.415055  |
| H | 3.118692  | 0.737715  | 1.284938  |
| H | 4.449122  | -0.155046 | 0.587799  |
| H | 3.472620  | 0.886350  | -0.419676 |

---

## TS15(2)

---

|   |           |           |           |
|---|-----------|-----------|-----------|
| C | 0.218617  | 1.653805  | -0.367010 |
| C | -0.910799 | 1.103157  | -0.813314 |
| C | -1.386206 | -0.188770 | -0.289231 |
| C | -0.556976 | -1.026461 | 0.337292  |
| C | 0.897382  | -0.762235 | 0.443153  |
| C | 1.097710  | 1.073825  | 0.732189  |
| H | 0.572984  | 2.597553  | -0.774795 |
| H | -1.502899 | 1.589941  | -1.583422 |
| O | -2.691734 | -0.526435 | -0.481223 |
| C | -3.568926 | -0.124095 | 0.567863  |
| H | -3.578303 | 0.964359  | 0.690230  |
| H | -4.562972 | -0.464040 | 0.279636  |
| H | -3.271279 | -0.592770 | 1.511559  |
| H | -0.924209 | -1.933301 | 0.810149  |
| H | 0.840839  | 1.174887  | 1.632419  |
| O | 2.491972  | 1.203120  | 0.441988  |
| H | 1.318976  | -1.013987 | 1.283969  |
| O | 1.745803  | -1.106009 | -0.655438 |
| O | 2.999215  | -1.157927 | -0.244753 |

---

## IM15(2)

---

|   |           |           |           |
|---|-----------|-----------|-----------|
| C | -1.601494 | 1.459753  | 0.747082  |
| C | -1.260014 | 0.220651  | 1.139907  |
| C | -0.520574 | -0.727619 | 0.268007  |
| C | 0.819325  | -0.675382 | -0.005642 |
| C | 1.781399  | 0.093490  | 0.687561  |
| C | -1.224743 | 2.050827  | -0.548738 |
| H | -2.196467 | 2.092033  | 1.399681  |
| H | -1.615155 | -0.171488 | 2.088305  |
| H | 1.482726  | 0.787808  | 1.469572  |
| H | -1.789425 | 2.947563  | -0.871471 |
| O | -1.221125 | -1.639121 | -0.411295 |
| C | -2.645265 | -1.676834 | -0.297066 |
| H | -3.087344 | -0.737769 | -0.638417 |
| H | -2.960482 | -2.497793 | -0.938031 |
| H | -2.945196 | -1.875453 | 0.735153  |
| O | -0.335038 | 1.604075  | -1.241103 |
| O | 3.508267  | -0.590810 | -0.589085 |
| O | 3.028369  | 0.155534  | 0.449227  |
| H | 1.175760  | -1.251631 | -0.853396 |

---



## TS16(2)

---

|   |           |           |           |
|---|-----------|-----------|-----------|
| C | -0.614486 | -1.439151 | -0.128886 |
| C | 0.567080  | -1.128325 | -0.662994 |
| C | 1.281067  | 0.098332  | -0.268933 |
| C | 0.639463  | 1.112647  | 0.315352  |
| C | -0.831120 | 1.113048  | 0.498557  |
| C | -1.324198 | -0.632818 | 0.949796  |
| H | -1.144321 | -2.335916 | -0.441314 |
| H | 1.027262  | -1.768118 | -1.410995 |
| O | 2.613128  | 0.189157  | -0.538461 |
| C | 3.462927  | -0.276835 | 0.506823  |
| H | 3.294178  | -1.337770 | 0.720680  |
| H | 4.483810  | -0.137285 | 0.153144  |
| H | 3.298512  | 0.307601  | 1.417984  |
| H | 1.179099  | 1.975962  | 0.695211  |
| H | -1.192562 | -0.854122 | 1.855504  |
| H | -1.327381 | 1.432286  | 1.273092  |
| O | -1.128935 | 1.610784  | -0.808526 |
| O | -2.489281 | -0.298354 | 0.611736  |
| O | -2.582787 | -0.297090 | -0.704947 |

---

## IM16(2)

---

|   |           |           |           |
|---|-----------|-----------|-----------|
| C | -0.352145 | 1.199429  | 1.352730  |
| C | -0.583651 | -0.118777 | 1.230831  |
| C | -0.165698 | -0.991782 | 0.118816  |
| C | 1.089911  | -1.141169 | -0.376534 |
| C | 2.322081  | -0.523399 | 0.121431  |
| C | 0.276647  | 1.983342  | 0.316039  |
| H | -0.674611 | 1.754961  | 2.226206  |
| H | -1.154061 | -0.614756 | 2.013585  |
| H | 2.160486  | 0.141388  | 0.991428  |
| H | 1.256286  | 2.438657  | 0.420346  |
| O | -1.103822 | -1.817554 | -0.395263 |
| C | -2.476102 | -1.633561 | -0.058987 |
| H | -2.761406 | -0.579221 | -0.116171 |
| H | -3.036039 | -2.207201 | -0.795988 |
| H | -2.691471 | -2.024259 | 0.940079  |
| O | -0.245684 | 2.150260  | -0.817369 |
| O | -1.470878 | 1.635745  | -1.069035 |
| O | 3.448117  | -0.673187 | -0.315544 |
| H | 1.212697  | -1.916183 | -1.127744 |

---

## TS6(2)

---

|   |           |           |           |
|---|-----------|-----------|-----------|
| C | -1.354241 | 1.066339  | -0.348720 |
| C | -0.377996 | 2.155058  | -0.438740 |
| C | 0.841431  | 2.009851  | 0.104874  |
| C | 1.285236  | 0.754142  | 0.807394  |
| C | 0.200940  | -0.356729 | 0.965901  |
| C | -1.108522 | -0.082095 | 0.289474  |
| H | -2.317105 | 1.220782  | -0.827049 |
| H | -0.665285 | 3.066038  | -0.949303 |
| H | 0.057564  | -0.620915 | 2.018066  |
| O | 1.328775  | -1.792823 | 0.063246  |
| O | 2.085857  | -1.208024 | -0.973225 |
| O | 2.788306  | -0.196660 | -0.271104 |
| H | 1.744593  | 1.019496  | 1.763633  |
| H | 1.530549  | 2.825447  | 0.035456  |
| O | -2.082433 | -1.127430 | 0.350063  |
| C | -3.261469 | -0.721602 | -0.349991 |
| H | -3.057185 | -0.681835 | -1.399556 |
| H | -4.045816 | -1.425693 | -0.165720 |
| H | -3.563622 | 0.246384  | -0.008515 |

---

## IM6(2)

---

|   |           |           |           |
|---|-----------|-----------|-----------|
| C | -1.056331 | 1.217438  | -0.208801 |
| C | 0.086121  | 2.133337  | -0.257781 |
| C | 1.297308  | 1.717955  | 0.147296  |
| C | 1.564200  | 0.323171  | 0.647945  |
| C | 0.316702  | -0.605911 | 0.772075  |
| C | -0.969834 | -0.031337 | 0.259866  |
| H | -2.009267 | 1.590940  | -0.572348 |
| H | -0.073512 | 3.139647  | -0.625139 |
| H | 0.205450  | -0.982797 | 1.793341  |
| O | 0.724825  | -1.751681 | 0.011783  |
| O | 1.495885  | -1.164284 | -1.012847 |
| O | 2.412958  | -0.386163 | -0.262667 |
| H | 2.130465  | 0.377842  | 1.581844  |
| H | 2.111555  | 2.411279  | 0.112612  |
| O | -2.104530 | -0.901248 | 0.284791  |
| C | -3.241761 | -0.216673 | -0.247151 |
| H | -3.109735 | -0.069420 | -1.298714 |
| H | -4.121768 | -0.800949 | -0.076535 |
| H | -3.344715 | 0.732583  | 0.235770  |

---

## TS17(2)

---

|   |           |           |           |
|---|-----------|-----------|-----------|
| C | -0.059274 | 2.053901  | -0.634748 |
| C | -1.230193 | 1.201307  | -0.429653 |
| C | -1.077669 | -0.051359 | 0.022323  |
| C | 0.269902  | -0.679581 | 0.233084  |
| C | 1.411534  | 0.687623  | 0.905716  |
| C | 1.129390  | 1.809533  | -0.075832 |
| H | -0.179846 | 2.924598  | -1.273378 |
| H | -2.213326 | 1.598014  | -0.651465 |
| H | 1.981881  | 2.452033  | -0.281006 |
| O | -2.040188 | -0.954739 | 0.284082  |
| C | -3.376378 | -0.482374 | 0.290029  |
| H | -3.682474 | -0.170581 | -0.715258 |
| H | -3.989378 | -1.320385 | 0.617450  |
| H | -3.477944 | 0.355862  | 0.987704  |
| H | 1.133879  | 0.762369  | 1.802338  |
| O | 2.660353  | 0.032250  | 0.669418  |
| O | 0.916778  | -1.258263 | -0.903393 |
| O | 1.955442  | -1.968720 | -0.504862 |
| H | 0.084263  | -0.640433 | 1.286130  |

---

## IM17(2)

---

|   |           |           |           |
|---|-----------|-----------|-----------|
| C | -1.923571 | 0.763493  | -1.051243 |
| C | -0.603555 | 1.247805  | -0.642497 |
| C | 0.422821  | 0.408908  | -0.395425 |
| C | 0.400846  | -1.032746 | -0.648063 |
| C | -2.313436 | -0.671519 | 0.958779  |
| C | -2.663321 | -0.129555 | -0.366586 |
| H | -2.326979 | 1.181387  | -1.971452 |
| H | -0.465840 | 2.320285  | -0.537537 |
| H | -3.019304 | -1.400587 | 1.401597  |
| H | -3.611732 | -0.472511 | -0.770518 |
| O | 1.625939  | 0.734767  | 0.141236  |
| C | 1.797091  | 2.072568  | 0.575707  |
| H | 1.012100  | 2.347726  | 1.290043  |
| H | 2.772028  | 2.110348  | 1.058465  |
| H | 1.781079  | 2.761984  | -0.275553 |
| O | -1.288090 | -0.382483 | 1.540003  |
| O | 2.530022  | -1.417839 | 0.017198  |
| O | 1.342603  | -1.844768 | -0.428527 |
| H | -0.526393 | -1.519776 | -0.938356 |

---

## TS18(2)

---

|   |           |           |           |
|---|-----------|-----------|-----------|
| C | 0.171689  | 1.905134  | -0.421414 |
| C | -1.117512 | 1.221339  | -0.319362 |
| C | -1.163644 | -0.081325 | -0.006863 |
| C | 0.070172  | -0.924145 | 0.142754  |
| C | 1.386559  | 0.175242  | 0.969479  |
| C | 1.297421  | 1.425950  | 0.115366  |
| H | 0.196918  | 2.847722  | -0.961220 |
| H | -2.025238 | 1.783000  | -0.502928 |
| H | 2.240568  | 1.951195  | -0.012054 |
| O | -2.255699 | -0.852488 | 0.147351  |
| C | -3.506499 | -0.187888 | 0.196058  |
| H | -3.739306 | 0.272852  | -0.770912 |
| H | -4.244823 | -0.954467 | 0.425119  |
| H | -3.498421 | 0.576010  | 0.980979  |
| H | 1.102320  | 0.193898  | 1.866959  |
| O | 0.650020  | -1.467751 | -1.046014 |
| H | -0.132041 | -0.971165 | 1.192420  |
| O | 2.392010  | -0.534471 | 0.706904  |
| O | 2.622534  | -0.508401 | -0.592549 |

---

## IM18(2)

---

|   |           |           |           |
|---|-----------|-----------|-----------|
| C | 0.246547  | -1.430231 | -0.845959 |
| C | -1.055657 | -1.021990 | -0.319302 |
| C | -1.545444 | 0.224817  | -0.130884 |
| C | -0.909052 | 1.521184  | -0.532789 |
| C | 1.701969  | -0.134641 | 0.628548  |
| C | 1.478604  | -1.022945 | -0.477713 |
| H | 0.192661  | -2.218787 | -1.595270 |
| H | -1.740419 | -1.850514 | -0.154074 |
| H | 0.905972  | 0.219297  | 1.277815  |
| H | 2.370712  | -1.400677 | -0.963868 |
| O | -2.790316 | 0.503412  | 0.323569  |
| C | -3.630207 | -0.568959 | 0.706678  |
| H | -3.157040 | -1.172668 | 1.489581  |
| H | -4.542046 | -0.114131 | 1.089770  |
| H | -3.868144 | -1.202380 | -0.155656 |
| O | 2.847445  | 0.253471  | 0.982974  |
| O | 3.923241  | -0.105687 | 0.238246  |
| O | -1.373366 | 2.619132  | -0.349644 |
| H | 0.071367  | 1.375109  | -1.023093 |

---
